# Supplementary material for: Total synthesis of (−)-depyranoversicolamide B
Source: Royal Society of Chemistry journal article supplement (doi:10.1039/c5cc05877e), 2015-01-01
Supplement: c5cc05877e1.pdf [file c5cc05877e1.pdf]

## Supporting Information

### Total Synthesis of (–)-Depyranoversicolamide B

Wen-Fang Qin,<sup>[a]</sup> Tao Xiao,<sup>[a]</sup> Dan Zhang,<sup>\*[b]</sup> Lin-Feng Deng,<sup>[b]</sup> Yu Wang<sup>[b]</sup> and Yong Qin<sup>\*[b]</sup>

<sup>a</sup>The Innovative Drug Research Centre, and School of Chemistry and Chemical Engineering,  
Chongqing University, Chongqing 401331, P. R. China

<sup>b</sup>Key Laboratory of Drug Targeting and Drug Delivery Systems of the Ministry of Education,  
West China School of Pharmacy, and State Key Laboratory of Biotherapy, Sichuan  
University, Chengdu 610041, P. R. China

E-mail: yongqin@scu.edu.cn; danzhang@scu.edu.cn

## Contents of Supporting Information

Page S-1: Title of the paper, author's name and address along with the contents.

Page S-5: Preparation of compound **N2-Boc Pyrroloindoline**

Page S-6: Preparation of compound **21**

Page S-7: Preparation of compound **24**

Page S-7: Preparation of **C3-isoprenylated indoline**

Page S-8: Preparation of compound **26**

Page S-9: Preparation of compound **27**

Page S-10: Preparation of compound **28**

Page S-11: Preparation of compound **29**

Page S-11: Preparation of compound **30** and **31**

Page S-13: Preparation of compound **18**

Page S-14: Preparation of compound **19**

Page S-15: Preparation of compound **33**

Page S-16: Preparation of compound **34**

Page S-17: Preparation of compound (–)-depyranoversicolamide B (**12**)

Page S-18: 2D spectrum data of (–)-depyranoversicolamide B (**12**)

Page S-19: <sup>1</sup>H NMR spectrum of compound **N2-Boc pyrroloindoline**

Page S-20: <sup>13</sup>C NMR spectrum of compound **N2-Boc pyrroloindoline**

Page S-21: <sup>1</sup>H NMR spectrum of compound **21**

Page S-22: <sup>13</sup>C NMR spectrum of compound **21**

Page S-23: <sup>1</sup>H NMR spectrum of compound **24**

Page S-24: <sup>13</sup>C NMR spectrum of compound **24**

Page S-25: DEPT spectrum of compound **24**

Page S-26: COSY spectrum of compound **24**

Page S-27: HSBC spectrum of compound **24**

Page S-28: HMQC spectrum of compound **24**

Page S-29: <sup>1</sup>H NMR spectrum of **C3-isoprenylated indoline**

Page S-30: <sup>13</sup>C NMR spectrum of **C3-isoprenylated indoline**

Page S-31: <sup>1</sup>H NMR spectrum of compound **26**

Page S-32:  $^{13}\text{C}$  NMR spectrum of compound **26**  
Page S-33:  $^1\text{H}$  NMR spectrum of compound **27**  
Page S-34:  $^{13}\text{C}$  NMR spectrum of compound **27**  
Page S-35: DEPT spectrum of compound **27**  
Page S-36: gCOSY spectrum of compound **27**  
Page S-37: gHMBC spectrum of compound **27**  
Page S-38: gHMQC spectrum of compound **27**  
Page S-39:  $^1\text{H}$  NMR spectrum of compound **28**  
Page S-40:  $^{13}\text{C}$  NMR spectrum of compound **28**  
Page S-41:  $^1\text{H}$  NMR spectrum of compound **29**  
Page S-42:  $^{13}\text{C}$  NMR spectrum of compound **29**  
Page S-43: DEPT spectrum of compound **29**  
Page S-44: gCOSY spectrum of compound **29**  
Page S-45: gHMBC spectrum of compound **29**  
Page S-46: gHMQC spectrum of compound **29**  
Page S-47: NOEDS spectrum of compound **29**  
Page S-48: NOEDS spectrum of compound **29**  
Page S-49:  $^1\text{H}$  NMR spectrum of compound **30**  
Page S-50:  $^{13}\text{C}$  NMR spectrum of compound **30**  
Page S-51:  $^1\text{H}$  NMR spectrum of compound **31**  
Page S-52:  $^{13}\text{C}$  NMR spectrum of compound **31**  
Page S-53:  $^1\text{H}$  NMR spectrum of compound **18**  
Page S-54:  $^{13}\text{C}$  NMR spectrum of compound **18**  
Page S-55:  $^1\text{H}$  NMR spectrum of compound **19**  
Page S-56:  $^{13}\text{C}$  NMR spectrum of compound **19**  
Page S-57: DEPT spectrum of compound **19**  
Page S-58: gCOSY spectrum of compound **19**  
Page S-59: gHMBC spectrum of compound **19**  
Page S-60: gHMQC spectrum of compound **19**  
Page S-61: NOEDS spectrum of compound **19**

Page S-62: NOEDS spectrum of compound **19**

Page S-63:  $^1\text{H}$  NMR spectrum of compound **33**

Page S-64:  $^{13}\text{C}$  NMR spectrum of compound **33**

Page S-65: NOEDS spectrum of compound **33**

Page S-66: NOEDS spectrum of compound **33**

Page S-67:  $^1\text{H}$  NMR spectrum of compound **34**

Page S-68:  $^{13}\text{C}$  NMR spectrum of compound **34**

Page S-69:  $^1\text{H}$  NMR spectrum of (–)-depyranoversicolamide B (**12**)

Page S-70:  $^{13}\text{C}$  NMR spectrum of (–)-depyranoversicolamide B (**12**)

Page S-71: DEPT spectrum of (–)-depyranoversicolamide B (**12**)

Page S-72: HSQC spectrum of (–)-depyranoversicolamide B (**12**)

Page S-73: HSQC spectrum of (–)-depyranoversicolamide B (**12**)

Page S-74: HMQC spectrum of (–)-depyranoversicolamide B (**12**)

Page S-75: HMQC spectrum of (–)-depyranoversicolamide B (**12**)

Page S-76: COSY spectrum of (–)-depyranoversicolamide B (**12**)

Page S-77: COSY spectrum of (–)-depyranoversicolamide B (**12**)

## General methods:

All commercially available reagents were used without further purification. All solvents were dried and distilled before use; THF were distilled from sodium/benzophenone ketyl; DCM and DMF were distilled from calcium hydride. Chromatography was conducted by using 200-300 mesh silica gel. All new compounds gave satisfactory spectroscopic analyses ( $^1\text{H}$  NMR,  $^{13}\text{C}$  NMR, HRMS). NMR spectra were recorded on 400 MHz NMR or 600 MHz NMR spectrometer. HRMS spectra were obtained by the ESI method.

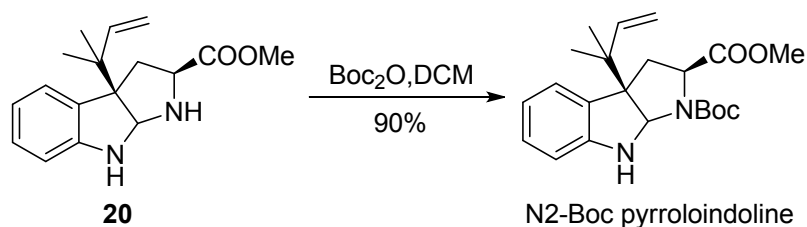

## Synthesis of N2-Boc pyrroloindoline

Pyrroloindoline **20** (15.0 g, 52.4 mmol) in dichloromethane (500 mL) was reacted with di-*tert*-butyl-dicarbonate (45.80 g, 209.6 mmol) at room temperature for 24 h. The reaction mixture was then quenched by addition of saturated  $\text{NaHCO}_3$  and extracted with DCM (500 mL  $\times$  3). The combined organic layers were washed with saturated  $\text{NaHCO}_3$  solution (100 mL) and brine (100 mL), dried over  $\text{Na}_2\text{SO}_4$ , filtered, and concentrated in vacuum. The residue was purified by silica gel flash chromatography (EtOAc/petroleum 1:10) to give N2-Boc pyrroloindoline as a pair of inseparable amide rotamers A and B (18.86 g, 90%) as white solids.  $[\alpha]_{\text{D}}^{20} = -301.9$  ( $c$  0.4,  $\text{CH}_2\text{Cl}_2$ ).  $^1\text{H}$  NMR (400 MHz,  $\text{CDCl}_3$ ; a mixture of rotamer A and B in 1:4 ratio)  $\delta$  7.17-7.08 (rotamer A and B; m, 2H), 6.75-6.71 (rotamer A and B; m, 1H), 6.60 (rotamer A and B; d,  $J = 8.0$  Hz, 1H), 5.41 (rotamer A; s, 1H), 5.35 (rotamer B; s, 1H), 5.07 (rotamer A and B; dd,  $J = 25.6, 11.2$  Hz, 2H), 3.94 (rotamer A and B; t,  $J = 8.0$  Hz, 1H), 3.72 (rotamer B; s, 3H), 3.71 (rotamer A; s, 3H), 2.43-2.34 (rotamer A and B; m, 2H), 1.36 (rotamer A and B; s, 9H), 1.06 (rotamer B; s, 3H), 1.05 (rotamer A; s, 3H), 1.00 (rotamer B; s, 3H), 0.98 (rotamer A; s, 3H) ppm.  $^{13}\text{C}$  NMR (100 MHz,

CDCl<sub>3</sub>; a mixture of rotamer A and B in a 1:4 ratio) rotamer B:  $\delta$  173.4, 153.7, 149.8, 143.9, 130.1, 128.6, 124.9, 118.7, 113.9, 109.1, 80.8, 78.4, 61.7, 59.3, 52.1, 41.0, 36.4, 28.5, 22.9, 22.3 ppm. rotamer A:  $\delta$  173.4, 153.7, 149.8, 143.9, 130.1, 128.6, 124.9, 118.2, 113.9, 109.3, 80.8, 79.1, 61.7, 59.3, 51.9, 41.0, 37.1, 28.1, 22.9, 22.3 ppm. HRESIMS  $m/z$  409.2103 [M+Na]<sup>+</sup> (calcd for C<sub>22</sub>H<sub>30</sub>N<sub>2</sub>O<sub>4</sub>Na 409.2115); IR (neat):  $\nu$  = 2977, 1753, 1693, 1607, 1394, 1365, 1172, 734 cm<sup>-1</sup>.

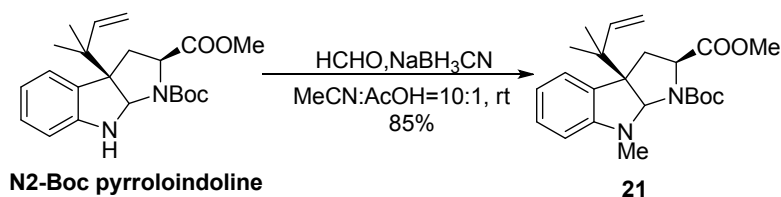

**(3a*R*)-1-*tert*-butyl 2-methyl 8-methyl-3a-(2-methylbut-3-en-2-yl)-3,3a,8,8a -tetrahydropyrrolo[2,3-*b*]indole-1,2(2*H*)-dicarboxylate **21****

To a solution of N2-Boc pyrroloindoline (2.1 g, 5.4 mmol) in 10% acetic acid (7.0 mL) in acetonitrile (63.0 mL), sodium cyanoborohydride (1.02 g, 16.3 mmol) and formaldehyde (37 % aqueous solution, 63 mL) was added. The reaction mixture was stirred at room temperature for 30 min and then quenched by addition of saturated NaHCO<sub>3</sub>. The mixture was extracted with EtOAc (50 mL × 3). The combined organic phases were dried over Na<sub>2</sub>SO<sub>4</sub>, filtered, and concentrated in vacuum. The residue was purified by silica gel flash chromatography (EtOAc/petroleum 1:10 ) to afford **21** (1.85 g, 85%) as a white solid.  $[\alpha]_D^{20}$  = -256.6 (*c* 0.5, CH<sub>2</sub>Cl<sub>2</sub>). <sup>1</sup>H NMR (400 MHz, CDCl<sub>3</sub>)  $\delta$  7.15-7.11 (m, 1H), 7.03 (d, *J* = 7.6 Hz, 1H), 6.67-6.64 (m, 1H), 6.38 (d, *J* = 7.2 Hz, 1H), 5.88 (dd, *J* = 17.2, 11.2 Hz, 1H ), 5.35 (s, 1H), 5.16-4.99 (m, 2H), 3.99-3.95 (m, 1H), 3.70 (s, 3H), 3.07-3.01 (m, 3H), 2.35 (d, *J* = 8.4 Hz, 2H), 1.37 (s, 9H), 1.00 (s, 3H), 0.93 (s, 3H) ppm. <sup>13</sup>C NMR (100 MHz, CDCl<sub>3</sub>)  $\delta$  173.3, 153.7, 151.4, 143.9, 130.2, 128.8, 124.4, 116.8, 113.7, 106.3, 85.0, 80.3, 61.3, 59.5, 51.8, 40.9, 37.6, 34.9, 28.0, 27.3, 23.1, 22.0 ppm. HRESIMS  $m/z$  400.2362 [M]<sup>+</sup> (calcd for C<sub>23</sub>H<sub>32</sub>N<sub>2</sub>O<sub>4</sub> 400.2372). IR (neat):  $\nu$  = 2977, 1753, 1704, 1605, 1495, 1394, 1169, 738 cm<sup>-1</sup>.

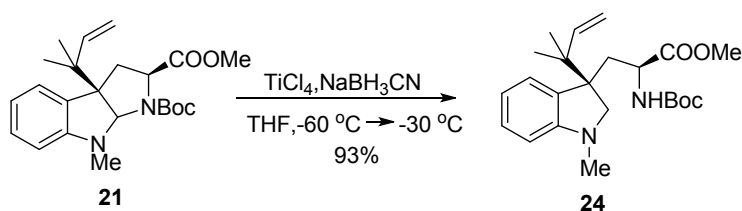

**Methyl 2-((*tert*-butoxycarbonyl)amino)-3-((*R*)-1-methyl-3-(2-methylbut-3-en-2-yl)indolin-3-yl)propanoate **24****

To a solution of **21** (3.2 g, 8.0 mmol) in THF (125 mL) was added NaBH<sub>3</sub>CN (5.0 g, 80.0 mmol) at -60 °C. After stirred for 10 min, a solution of TiCl<sub>4</sub> (3.2 mL) in DCM (200 mL) was added dropwise. The reaction mixture was warmed up to -30 °C, stirred for additional 24 h, and then quenched by addition of saturated NaHCO<sub>3</sub>. The residue was extracted with EtOAc (100 mL × 3), and then combined organic layers were washed with saturated NaHCO<sub>3</sub> solution (100 mL) and brine (100 mL), dried over Na<sub>2</sub>SO<sub>4</sub>, filtered, and concentrated in vacuum. The residue was purified by silica gel flash chromatography (EtOAc/petroleum 1:10) to afford **24** (2.57 g, 80%) as a white solid.  $[\alpha]^{20}_D = +0.6$  (*c* 0.6, CH<sub>2</sub>Cl<sub>2</sub>). <sup>1</sup>H NMR (400 MHz, CDCl<sub>3</sub>) 7.06 (t, *J* = 8.0 Hz, 1H), 6.98 (d, *J* = 7.6 Hz, 1H), 6.59 (t, *J* = 6.8 Hz, 1H), 6.39 (d, *J* = 8.0 Hz, 1H), 5.96 (dd, *J* = 17.2, 10.8 Hz, 1H), 5.04 (dd, *J* = 17.2, 10.8 Hz, 2H), 4.99 (s, 1H), 4.06 (s, 1H), 3.45 (d, *J* = 9.6 Hz, 1H), 3.38 (s, 3H), 3.29 (d, *J* = 10.4 Hz, 1H), 2.73 (s, 3H), 2.39 (dd, *J* = 14.4, 6.0 Hz, 1H), 1.87 (dd, *J* = 14.0, 6.8 Hz, 1H), 1.41 (s, 9H), 1.01 (s, 3H), 0.98 (s, 3H) ppm. <sup>13</sup>C NMR (150 MHz, CDCl<sub>3</sub>) δ 173.7, 154.7, 153.9, 144.8, 130.2, 128.1, 125.5, 116.4, 113.2, 106.6, 60.9, 52.3, 52.0, 51.6, 43.4, 37.3, 35.3, 30.9, 28.2, 22.6, 22.4 ppm. HRESIMS *m/z* 425.2416 [M+Na]<sup>+</sup> (calcd for C<sub>23</sub>H<sub>34</sub>N<sub>2</sub> Na O<sub>4</sub> 425.2418). IR (neat): ν = 2928, 2857, 1718, 1604, 1499, 1366, 1168, 799 cm<sup>-1</sup>.

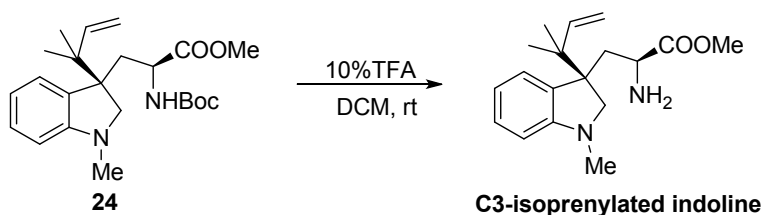

**Methyl 2-amino-3-((*R*)-1-methyl-3-(2-methylbut-3-en-2-yl)indolin-3-yl)propanoate**

To a solution of **24** (3.0 g, 7.4 mmol) in DCM (100 mL), 10% TFA (20 mL) in DCM (80 mL) was added dropwise at 0 °C. The reaction mixture was warmed up to room temperature and stirred for additional 2 h. After completion of the reaction, it was quenched by addition of saturated NaHCO<sub>3</sub> at 0 °C and extracted with DCM (100 mL × 3). The combined organic layers were washed with saturated NaHCO<sub>3</sub> solution (100 mL) and brine (100 mL), dried over Na<sub>2</sub>SO<sub>4</sub>, filtered, and concentrated in vacuum. The residue was purified by silica gel flash chromatography (EtOAc/petroleum 1:10 to 1:1 ) to afford C3-isoprenylated indoline (2.1 g, 93%) as a white solid.  $[\alpha]^{20}_{\text{D}} = +11.6$  (*c* 0.4, CH<sub>2</sub>Cl<sub>2</sub>). <sup>1</sup>H NMR (400 MHz, CDCl<sub>3</sub>) 7.07 (t, *J* = 7.6 Hz, 1H ), 7.01 (d, *J* = 7.2 Hz, 1H), 6.59 (t, *J* = 7.6 Hz, 1H ), 6.41 (d, *J* = 8.0 Hz, 1H), 5.96 (dd, *J* = 17.2, 10.8 Hz, 1H), 5.04 (dd, *J* = 11.2, 10.0 Hz, 2H), 3.54 (d, *J* = 10.0 Hz, 1H), 3.47 (s, 3H), 3.42 (d, *J* = 10.4 Hz, 1H), 2.74 (s, 3H), 2.44 (dd, *J* = 14.0, 4.8 Hz, 1H), 1.71 (dd, *J* = 14.0, 6.8 Hz, 1H), 1.87 (dd, *J* = 14.0, 6.8 Hz, 1H), 1.03 (s, 3H), 1.00 (s, 3H) ppm. <sup>13</sup>C NMR (150 MHz, CDCl<sub>3</sub>) δ 176.8, 154.1, 145.1, 130.8, 128.0, 125.7, 116.3, 112.9, 106.6, 61.5, 52.8, 52.5, 51.8, 43.7, 39.7, 35.4, 22.7, 22.5 ppm. HRESIMS *m/z* 303.2073 [M+H]<sup>+</sup> (calcd for C<sub>18</sub>H<sub>27</sub>N<sub>2</sub>O<sub>2</sub> 303.2067); IR (neat): ν = 3611, 3289, 2966, 1681, 1262, 1208, 1144, 1019, 801 cm<sup>-1</sup>.

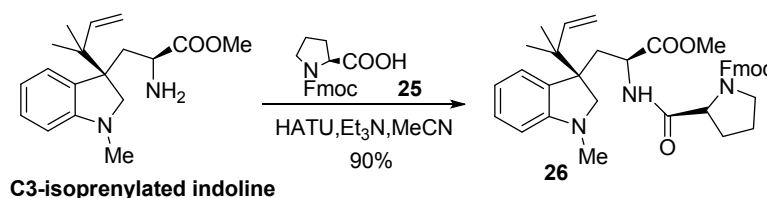

**(9H-fluoren-9-yl)methyl 2-((1-methoxy-3-((*R*)-1-methyl-3-(2-methylbut-3-en -2-yl)indolin-3-yl)-1-oxopropan-2-yl)carbamoyl)pyrrolidine-1-carboxylate **26****

Under N<sub>2</sub>, C3-isoprenylated indoline (2.0 g, 6.6 mmol) and HATU (3.0 g, 7.9 mmol) was stirred in dry acetonitrile (100 mL) at 0 °C. After stirring for five minutes, triethylamine (1.8 mL, 13.2 mmol) was added slowly to the mixture and reacted at 0 °C for another five minutes when Fmoc-*L*-proline **25** (4.5 g, 13.2 mmol) was introduced to the mixture by syringe. The mixture was warmed up to room temperature and stirred for additional 2 h. After completion of the reaction, it was quenched by addition of H<sub>2</sub>O at 0 °C and extracted with EtOAc (100 mL × 3). The



combined organic phases were dried over Na<sub>2</sub>SO<sub>4</sub>, filtered, and concentrated in vacuum. The residue was purified by silica gel flash chromatography (EtOAc/petroleum 1:3 ) to afford **26** (3.7 g, 90%) as a white solid.  $[\alpha]_D^{20} = -60.7$  (*c* 0.8, CH<sub>2</sub>Cl<sub>2</sub>). <sup>1</sup>H NMR (400 MHz, CDCl<sub>3</sub>) 7.76 (s, 2H), 7.59-7.52 (m, 2H), 7.40-7.26 (m, 4H), 7.07-6.97 (m, 3H), 6.58 (t, *J* = 8.0 Hz, 1H), 6.37-6.35 (m, 1H), 5.89-5.85 (m, 1H), 4.95 (t, *J* = 10.4 Hz, 2H), 4.42-4.26 (m, 5H), 3.52 (s, 2H), 3.38 (s, 3H), 3.33 (d, *J* = 10.0 Hz, 1H), 3.19 (d, *J* = 10.4 Hz, 1H), 2.70-2.63 (m, 3H), 2.43-2.26 (m, 2H), 1.98-1.88 (m, 4H), 0.96 (s, 3H), 0.91 (s, 3H) ppm. <sup>13</sup>C NMR (150 MHz, CDCl<sub>3</sub>)  $\delta$  172.8, 170.6, 155.9, 153.9, 144.6, 143.7, 141.2, 130.3, 128.2, 127.6, 127.0, 125.3, 124.9, 119.9, 116.4, 113.0, 106.6, 67.6, 60.5, 60.2, 52.3, 52.0, 50.4, 47.1, 46.8, 43.2, 38.4, 36.9, 35.2, 28.0, 24.5, 22.5, 22.3 ppm. HRESIMS *m/z* 622.3281 [M+H]<sup>+</sup> (calcd for C<sub>38</sub>H<sub>44</sub>N<sub>3</sub>O<sub>5</sub> 622.3278); IR (neat):  $\nu$  = 2951, 1744, 1695, 1451, 1419, 1355, 1201, 1121, 742 cm<sup>-1</sup>.

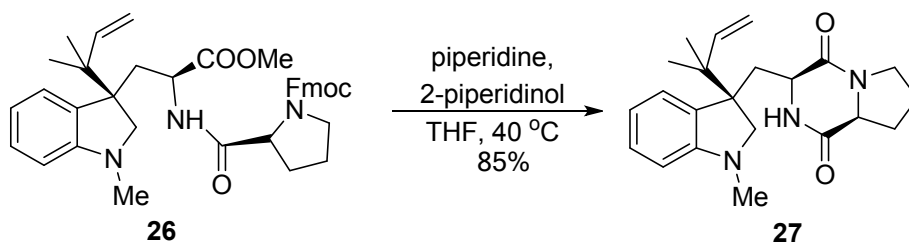

### 3-(((*R*)-1-methyl-3-(2-methylbut-3-en-2-yl)indolin-3-yl)methyl)hexahydropyrrolo[1,2-*a*]pyrazine-1,4-dione **27**

To a solution of **26** (3.7 g, 6.0mmol) in dry THF (100 mL) was added 2-piperidinol (1.2 g, 12.0 mmol) in one portion. After stirring at 0 °C for five minutes, a solution of piperidine (15 mL) in THF (85 mL) was added slowly to the mixture. The mixture was warmed up to room temperature and stirred for additional 24 h. After completion of the reaction, it was quenched by addition of saturated NH<sub>4</sub>Cl at 0 °C and extracted with EtOAc (100 mL  $\times$  3). The combined organic phases were dried over Na<sub>2</sub>SO<sub>4</sub>, filtered, and concentrated in vacuum. The residue was purified by silica gel flash chromatography (EtOAc/petroleum 1:10 to 1:2 ) to afford **27** (1.8 g, 85%) as a yellow oil.  $[\alpha]_D^{20} = -60.9$  (*c* 0.7, CH<sub>2</sub>Cl<sub>2</sub>). <sup>1</sup>H NMR (600 MHz, CDCl<sub>3</sub>) 7.20 (d, *J* = 7.8 Hz, 1H), 7.14 (t, *J* = 7.8 Hz, 1H), 6.71 (t, *J* = 7.2 Hz, 1H), 6.55 (d, *J* = 8.4 Hz, 1H), 6.00-

5.97 (m, 1H), 5.08 (t,  $J = 9.6$  Hz, 2H), 3.87 (t,  $J = 7.2$  Hz, 1H), 3.58-3.56 (m, 1H), 3.45-3.41 (m, 3H), 3.21 (d,  $J = 15.6$  Hz, 1H), 3.12(d,  $J = 10.2$  Hz, 1H), 2.80 (s, 3H), 2.28-2.26 (m, 1H), 1.97-1.94 (m, 2H), 1.97-1.94 (m, 2H), 1.81-1.77 (m, 2H), 1.12 (s, 3H), 1.11 (s, 3H) ppm.  $^{13}\text{C}$  NMR (150 MHz,  $\text{CDCl}_3$ )  $\delta$  169.6, 165.6, 152.8, 145.0, 131.3, 128.4, 125.2, 118.8, 113.4, 108.7, 64.1, 58.7, 54.5, 52.2, 45.4, 43.3, 37.6, 35.7, 28.5, 23.5, 23.1, 22.2 ppm. HRESIMS  $m/z$  390.2157  $[\text{M}+\text{Na}]^+$  (calcd for  $\text{C}_{22}\text{H}_{29}\text{N}_3\text{NaO}_2$  390.2153); IR (KBr)  $\nu_{\text{max}}$  3609, 2971, 1680, 1419, 749  $\text{cm}^{-1}$ .

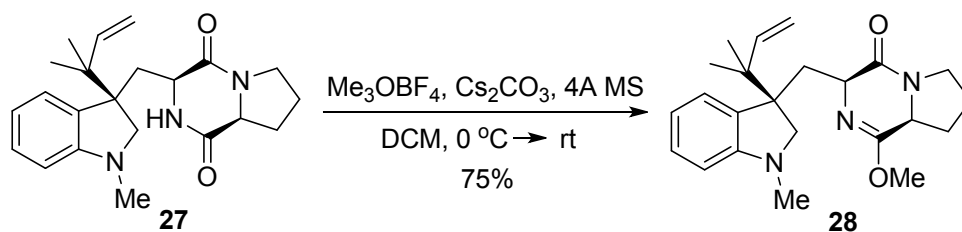

**1-methoxy-3-(((*R*)-1-methyl-3-(2-methylbut-3-en-2-yl)indolin-3-yl)methyl)-6,7,8,8a-tetrahydropyrrolo[1,2-*a*]pyrazin-4(3*H*)-one 28**

**27** (500 mg, 1.4 mmol),  $\text{CsCO}_3$  (2.9 g, 8.9 mmol), and 4Å molecular sieves (150 mg) were mixed and stirred in dry DCM (50 mL), when trimethyloxonium tetrafluoroborate (2.0 g, 14.0 mmol) was introduced by syringe and stirred at 0 °C under nitrogen. The mixture was warmed up to room temperature and stirred for additional 3h. After completion of the reaction, it was quenched by addition of saturated NaCl and extracted with DCM (50 mL  $\times$  3). The combined organic phases were dried over  $\text{Na}_2\text{SO}_4$ , filtered, and concentrated in vacuum. The residue was purified by silica gel flash chromatography (EtOAc/petroleum 1:5 ) to afford **28** (389.3 mg, 75%) as a yellow oil.  $[\alpha]_{\text{D}}^{20} = -126.4$  ( $c$  0.3,  $\text{CH}_2\text{Cl}_2$ ).  $^1\text{H}$  NMR (600 MHz,  $\text{CDCl}_3$ ) 7.07-7.03 (m, 2H), 6.56 (t,  $J = 7.2$  Hz, 1H ), 6.33 (d,  $J = 7.8$  Hz, 1H ), 6.01 (dd,  $J = 17.4, 10.8$  Hz, 1H), 5.02 (t,  $J = 10.8$  Hz, 2H), 4.00 (d,  $J = 9.6$  Hz, 1H), 3.83 (s, 1H), 3.63 (s, 3H), 3.59-3.58 (m, 1H), 3.51 (dd,  $J = 20.4, 9.6$  Hz, 1H), 3.42 (d,  $J = 9.6$  Hz, 1H), 3.37 (t,  $J = 9.6$  Hz, 1H), 3.13 (d,  $J = 15.0$  Hz, 1H), 2.69 (s, 3H), 2.18-2.16 (m, 1H), 1.95 (s, 1H), 1.79-1.75 (m, 2H), 1.07 (s, 3H), 1.03 (s, 3H) ppm.  $^{13}\text{C}$  NMR (150 MHz,  $\text{CDCl}_3$ )  $\delta$  169.0, 160.8, 154.5, 145.5, 131.6, 127.6, 126.0, 116.0, 112.3, 105.6, 60.5, 58.1, 56.4, 53.4, 44.5, 43.7, 35.2, 34.4, 31.8, 29.6, 28.7, 22.6, 22.4 ppm.

HRESIMS  $m/z$  382.2495  $[M+H]^+$  (calcd for  $C_{23}H_{32}N_3O_2$  382.2494). IR (neat):  $\nu$  = 3626, 2943, 1673, 1603, 1499, 1433, 1258, 750  $cm^{-1}$ .

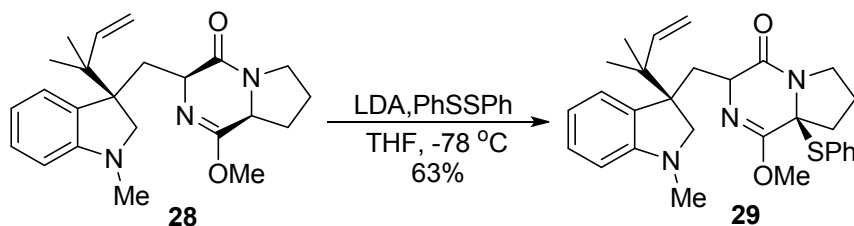

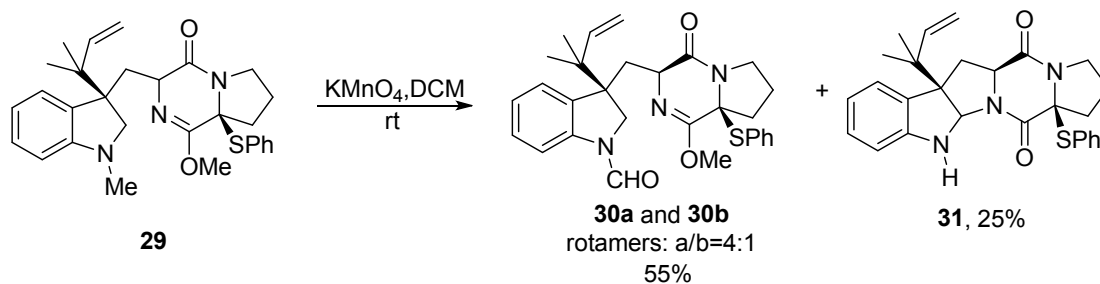

**(3*R*)-3-(((8*aS*)-1-methoxy-4-oxo-8*a*-(phenylthio)-3,4,6,7,8,8*a*-hexahydropyrrolo[1,2-*a*]pyrazin-3-yl)methyl)-3-(2-methylbut-3-en-2-yl)indoline-1-carbaldehyde **30****

To a stirred solution of **29** (200 mg, 0.4 mmol) in DCM (20 mL) was added potassium permanganate (194 mg, 1.2 mmol) and stirred at 0 °C. The mixture was warmed up to room temperature and stirred for additional 20 h. After completion of the reaction, it was quenched by saturated NaHSO<sub>3</sub> and extracted with DCM (20 mL × 3). The combined organic phases were dried over Na<sub>2</sub>SO<sub>4</sub>, filtered, and concentrated in vacuum. The residue was purified by silica gel flash chromatography (EtOAc/petroleum 1:2 ) to give a mixture of two amide rotamer **30a** and **30b** (113.1 mg, 55%, 1:4) as a yellow oil.  $[\alpha]_D^{20} = -265.2$  (*c* 0.2, CH<sub>2</sub>Cl<sub>2</sub>). <sup>1</sup>H NMR (600 MHz, CDCl<sub>3</sub>; a mixture of rotamers **30a** and **30b**)  $\delta$  8.90 (rotamer **a**; s, 1H), 8.92 (rotamer **b**; s, 1H), 8.15 (rotamer **b**; d, *J* = 12.0 Hz, 1H), 7.33-7.26 (rotamers **a** and **b**; m, 1H), 7.27 (rotamers **a** and **b**; d, *J* = 7.8 Hz, 1H), 7.19 (rotamers **a** and **b**; d, *J* = 7.8 Hz, 1H), 7.08-7.05 (rotamers **a** and **b**; m, 3H), 6.68 (rotamers **a** and **b**; t, *J* = 7.2 Hz, 1H), 6.88 (rotamers **a** and **b**; t, *J* = 7.2 Hz, 1H), 5.71 (rotamers **a** and **b**; dd, *J* = 16.2, 10.8 Hz, 1H), 5.01-4.91 (rotamers **a** and **b**; m, 2H), 4.48 (rotamer **b**; d, *J* = 11.4 Hz, 1H), 4.13 (rotamer **a**; d, *J* = 12.6 Hz, 1H), 4.02 (rotamer **a**; d, *J* = 13.2 Hz, 1H), 3.95 (rotamer **b**; d, *J* = 6.8 Hz, 1H), 3.82-3.79 (rotamers **a** and **b**; m, 1H), 2.28-2.20 (rotamers **a** and **b**; m, 3H), 2.07-1.99 (rotamers **a** and **b**; m, 1H), 1.55 (rotamers **a** and **b**; dd, *J* = 13.8, 9.6 Hz, 1H), 0.92 (rotamers **a** and **b**; s, 3H), 0.89 (rotamers **a** and **b**; s, 3H) ppm. <sup>13</sup>C NMR (150 MHz, CDCl<sub>3</sub>; all signals for the amide rotamers are listed)  $\delta$  169.7, 159.0, 157.2, 156.8, 143.9, 143.6, 142.5, 137.1, 137.0, 134.2, 129.9, 129.3, 128.4, 128.2, 127.3, 126.1, 123.8, 123.5, 116.1, 113.8, 74.0, 56.8, 53.4, 53.1, 52.7, 52.6, 50.8, 43.8, 36.0, 35.1, 22.2, 21.8, 20.2 ppm. HRESIMS *m/z* 526.2140 [M+Na]<sup>+</sup> (calcd for

C<sub>29</sub>H<sub>33</sub>N<sub>3</sub>O<sub>3</sub>NaS 526.2157); IR (neat):  $\nu$  = 2938, 1794, 1671, 1484, 1385, 1238, 1118, 1039, 898, 753 cm<sup>-1</sup>.

**31** (51.4 mg, 25%) as a yellow oil.  $[\alpha]^{20}_D$  = -198.8 (*c* 0.4, CH<sub>2</sub>Cl<sub>2</sub>). <sup>1</sup>H NMR (400 MHz, CDCl<sub>3</sub>) 7.28 (d, *J* = 8.4 Hz, 2H), 7.20 (t, *J* = 7.6 Hz, 1H), 7.08 (t, *J* = 7.6 Hz, 1H), 7.20 (d, *J* = 7.2 Hz, 1H), 6.86 (t, *J* = 7.6 Hz, 2H), 6.77 (t, *J* = 7.2 Hz, 1H), 6.71 (d, *J* = 8.0 Hz, 1H), 5.86 (dd, *J* = 17.6, 10.8 Hz, 1H), 5.37 (s, 1H), 5.06-4.97 (m, 3H), 3.73-3.68 (m, 1H), 3.73-3.68 (m, 1H), 3.48 (s, 0.5H), 3.10 (s, 0.5H), 2.43-2.36 (m, 3H), 2.20-2.00 (m, 4H), 1.00 (s, 3H), 0.91 (s, 3H) ppm. <sup>13</sup>C NMR (150 MHz, CDCl<sub>3</sub>)  $\delta$  171.0, 166.8, 164.9, 149.9, 143.4, 137.3, 130.0, 129.2, 128.8, 128.6, 124.9, 118.5, 114.2, 108.9, 74.4, 76.2, 61.2, 60.2, 59.2, 44.9, 40.4, 43.5, 36.1, 35.5, 22.5, 22.6, 22.2, 20.9 ppm. HRESIMS *m/z* 482.1878 [M+Na-CH<sub>2</sub>]<sup>+</sup> (calcd for C<sub>27</sub>H<sub>29</sub>N<sub>3</sub>O<sub>2</sub>S 482.1878); IR (neat):  $\nu$  = 3508, 2661, 1415, 753, 693 cm<sup>-1</sup>.

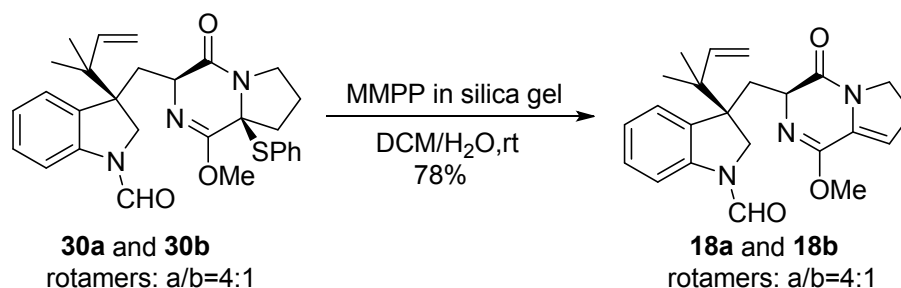

### (3*R*)-3-((1-methoxy-4-oxo-3,4,6,7-tetrahydropyrrolo[1,2-*a*]pyrazin-3-yl)methyl)-3-(2-methylbut-3-en-2-yl)indoline-1-carbaldehyde **18**

Monoperoxyphthalic acid magnesium salt hexahydrate (MMPP) (704 mg, 1.4 mmol) and silica gel (54-75 $\mu$ m) (3.0 g) in 2.25 mL H<sub>2</sub>O was vigorously stirred for 5 minutes. The freshly prepared mixture was then added to a solution of **30a** and **30b** (180 mg, 0.36 mmol) in DCM (18 mL) in one portion and stirred for another 30 minutes. After completion of the reaction, it was quenched by addition of saturated NaHSO<sub>3</sub> and extracted with DCM (20 mL  $\times$  3). The combined organic phases were dried over Na<sub>2</sub>SO<sub>4</sub>, filtered, and concentrated in vacuum. The residue was purified by silica gel flash chromatography (EtOAc/petroleum 1:2) to give a mixture of diene **18a** and **18b** (109.7 mg, 78%) as a white solid.  $[\alpha]^{20}_D$  = -265.2 (*c* 0.2, CH<sub>2</sub>Cl<sub>2</sub>). <sup>1</sup>H NMR (600 MHz, CDCl<sub>3</sub>; a mixture of rotamer **a** and **b** in a 1:4 ratio)  $\delta$  8.88 (rotamer **a**; s, 1H),

8.44 (rotamer **b**; s, 1H), 8.08 (rotamer **a**; d,  $J = 7.8$  Hz, 1H), 7.43-7.40 (rotamers **a** and **b**; m, 1H), 7.21 (rotamers **a** and **b**; d,  $J = 7.2$  Hz, 1H), 7.16 (rotamer **a**; d,  $J = 8.0$  Hz, 1H), 7.09 (rotamers **a** and **b**; t,  $J = 7.2$  Hz, 1H), 5.82 (rotamers **a** and **b**; dd,  $J = 17.2, 10.8$  Hz, 1H), 5.51 (rotamers **a** and **b**; s, 1H), 5.05 (rotamers **a** and **b**; dd,  $J = 17.2, 10.8$  Hz, 2H), 4.73 (rotamer **b**; d,  $J = 7.2$  Hz, 1H), 4.53 (rotamer **a**; d,  $J = 8.4$  Hz, 1H), 4.13 (rotamer **a**; d,  $J = 8.4$  Hz, 1H), 4.08 (rotamer **b**; d,  $J = 6.8$  Hz, 1H), 3.94-3.81 (rotamers **a** and **b**; m, 3H), 3.64-3.62 (rotamers **a** and **b**; m, 3H), 2.95-2.92 (rotamers **a** and **b**; m, 1H), 2.71-2.69 (rotamers **a** and **b**; m, 2H), 1.82 (rotamers **a** and **b**; dd,  $J = 13.6, 10.8$  Hz, 1H), 1.02 (rotamers **a** and **b**; s, 3H), 1.00 (rotamers **a** and **b**; s, 3H) ppm.  $^{13}\text{C}$  NMR (150 MHz,  $\text{CDCl}_3$ ; all signals for the amide rotamers are listed)  $\delta$  166.7, 159.1, 157.0, 150.8, 143.7, 142.8, 134.1, 129.6, 128.1, 127.6, 126.4, 123.9, 123.5, 116.2, 114.1, 111.0, 108.7, 60.5, 53.1, 53.0, 52.9, 52.1, 44.4, 44.0, 38.4, 27.8, 22.4, 22.0 ppm. HRESIMS  $m/z$  416.1950  $[\text{M}+\text{Na}]^+$  (calcd for  $\text{C}_{23}\text{H}_{27}\text{N}_3\text{O}_3\text{Na}$  416.1949). IR (neat):  $\nu = 3613, 2924, 2855, 1681, 1626, 1261, 1019, 801\text{ cm}^{-1}$ .

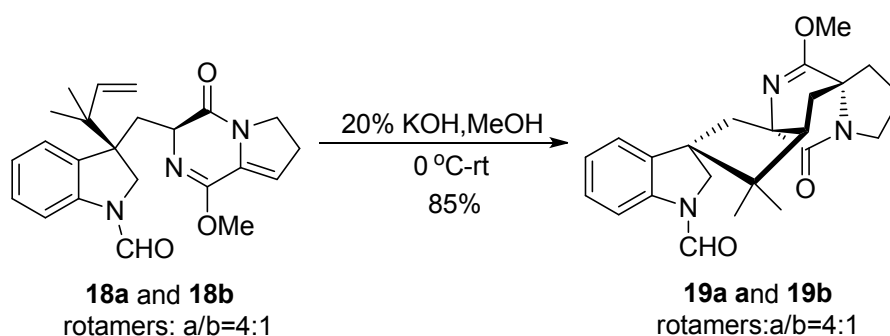

**(3'*R*,5a*S*,8a*R*,9a*R*)-10-methoxy-8,8-dimethyl-5-oxo-1,2,3,5,6,8,8a,9-octahydrospiro[5a,9a-(azenometheno)cyclopenta[*f*]indolizine-7,3'-indoline]-1'-carbaldehyde **19****

To a solution of diene **18a** and **18b** (175 mg, 0.405 mmol) in MeOH (28 mL) at 0 °C was added 20% aqueous KOH (7 mL). The reaction mixture was slowly warmed to room temperature over 1 hour and stirred for another 5 hours. After completion of the reaction, it was quenched by addition of  $\text{H}_2\text{O}$  at 0 °C and extracted with EtOAc (30 mL  $\times$  3). The combined organic phases were dried over  $\text{Na}_2\text{SO}_4$ , filtered, and concentrated in vacuum. The residue was purified by silica gel flash chromatography (EtOAc/petroleum 1:2) to give a mixture of two amide rotamer **19a** and **19b** (148.7

mg, 85%) in 1:4 ratio as a white solid.  $[\alpha]_D^{20} = -92.4$  ( $c$  0.2,  $\text{CH}_2\text{Cl}_2$ );  $^1\text{H}$  NMR (600 MHz,  $\text{CDCl}_3$ ; a mixture of rotamers **a** and **b** in a 1:4 ratio)  $\delta$  8.80 (rotamer **a**; s, 1H), 8.43 (rotamer **a**; s, 1H), 7.19 (rotamer **b**; d,  $J = 7.8$  Hz, 1H), 8.06 (rotamer **b**; d,  $J = 7.8$  Hz, 1H), 7.43 (rotamer **b**; d,  $J = 7.2$  Hz, 1H), 7.28-7.23 (rotamers **a** and **b**; m, 1H), 7.19 (rotamer **a**; d,  $J = 7.8$  Hz, 1H), 7.13-7.11 (rotamers **a** and **b**; m, 1H), 4.64 (rotamer **a**; d,  $J = 12.6$  Hz, 1H), 4.38 (rotamer **b**; d,  $J = 11.4$  Hz, 1H), 3.84 (rotamer **b**; d,  $J = 11.4$  Hz, 1H), 3.79 (rotamers **a** and **b**; s, 3H), 3.54 (rotamer **a**; d,  $J = 12.0$  Hz, 2H), 3.41-3.36 (rotamers **a** and **b**; m, 2H), 2.99 (rotamers **a** and **b**; t,  $J = 15.6$  Hz, 1H), 2.87 (rotamers **a** and **b**; t,  $J = 15.6$  Hz, 1H), 2.59-2.56 (rotamers **a** and **b**; m, 1H), 2.49-2.46 (rotamers **a** and **b**; m, 1H), 2.04-2.00 (v; m, 1H), 1.98-1.88 (rotamers **a** and **b**; m, 2H), 1.85-1.81 (rotamers **a** and **b**; m, 1H), 1.50-1.45 (rotamers **a** and **b**; m, 1H), 0.73 (rotamer **b**; s, 3H), 0.72 (rotamer **a**; s, 3H), 0.69 (rotamer **b**; s, 3H), 0.68 (rotamer **a**; s, 3H) ppm.  $^{13}\text{C}$  NMR (150 MHz,  $\text{CDCl}_3$ ; all signals for the amide rotamers are listed)  $\delta$  172.3, 170.8, 158.3, 156.8, 141.2, 134.6, 128.2, 127.2, 125.9, 124.0, 123.7, 116.6, 109.7, 72.4, 67.3, 59.8, 59.0, 57.3, 54.3, 54.1, 53.6, 46.8, 46.7, 43.1, 41.8, 41.6, 30.5, 30.4, 29.6, 28.8, 25.1, 21.5, 21.0, 19.8, 19.6 ppm. HRESIMS  $m/z$  416.1950  $[\text{M}+\text{Na}]^+$  (calcd for  $\text{C}_{23}\text{H}_{27}\text{N}_3\text{O}_3\text{Na}$  416.1949); IR (neat):  $\nu = 3600, 2947, 1679, 1590, 1489, 1362\text{ cm}^{-1}$ .

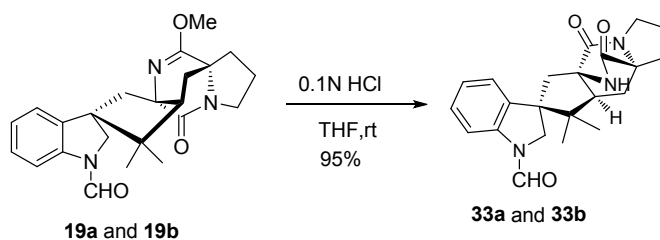

**(3'*R*,5*aS*,8*aR*,9*aR*)-8,8-dimethyl-5,10-dioxo-1,2,3,5,6,8,8*a*,9-octahydrospiro[5*a*,9*a*-(epiminomethano)cyclopenta[*f*]indolizine-7,3'-indoline]-1'-carbaldehyde **33****

To a solution of rotamers **19a** and **19b** (100 mg, 0.254 mmol) in THF (5 mL) at 0 °C was added 0.1N HCl (5 mL). The reaction mixture was slowly warmed to room temperature and stirred for another 20 minutes. After completion of the reaction, it was then quenched by addition of  $\text{NaHCO}_3$  at 0 °C and extracted with EtOAc (10 mL  $\times$  3). The combined organic phases were dried over  $\text{Na}_2\text{SO}_4$ , filtered, and

concentrated in vacuum. The residue was purified by silica gel flash chromatography (EtOAc/petroleum 1:2 ) to give a mixture of two amide rotamers **33a** and **33b** (91.6 mg, 95%) in 1:4 ratio as a white solid.  $[\alpha]_D^{20} = -91.2$  ( $c$  0.1,  $\text{CH}_2\text{Cl}_2$ ).  $^1\text{H}$  NMR (600 MHz,  $\text{CDCl}_3$ ; a mixture of rotamer **a** and **b** in a 1:4 ratio)  $\delta$  8.82 (rotamer **a**; s, 1H), 8.45 (rotamer **b**; s, 1H), 0.08 (rotamer **b**; d,  $J = 7.8$  Hz, 1H), 7.96 (rotamer **b**; s, 1H), 7.80 (rotamer **a**; s, 1H), 7.42 (rotamers **a** and **b**; d,  $J = 7.8$  Hz, 1H), 7.32-7.28 (rotamers **a** and **b**; m, 1H), 7.20 (rotamers **a** and **b**; d,  $J = 7.8$  Hz, 1H), 7.15-7.12 (rotamers **a** and **b**; m, 1H), 4.64 (rotamer **a**; d,  $J = 12.6$  Hz, 1H), 4.37 (rotamer **b**; d,  $J = 11.4$  Hz, 1H), 3.83 (rotamer **a**; d,  $J = 10.8$  Hz, 1H), 3.52 (rotamer **a**; d,  $J = 12.6$  Hz, 1H), 3.50-3.43 (rotamers **a** and **b**; m, 2H), 2.92 (rotamers **a** and **b**; t,  $J = 15.0$  Hz, 1H), 2.80-2.74 (rotamers **a** and **b**; m, 1H), 2.51-2.41 (rotamers **a** and **b**; m, 2H), 2.09-2.00 (rotamers **a** and **b**; m, 2H), 1.99-1.96 (rotamers **a** and **b**; m, 1H), 1.96-1.86 (rotamers **a** and **b**; m, 1H), 1.80-1.75 (rotamers **a** and **b**; m, 1H), 0.83 (rotamer **a**; s, 3H), 0.80 (rotamer **b**; s, 3H); 0.79 (rotamer **b**; s, 3H), 0.74 (rotamer **a**; s, 3H) ppm.  $^{13}\text{C}$  NMR (150 MHz,  $\text{CDCl}_3$ ; all signals for the amide rotamers are listed)  $\delta$  173.8, 169.7, 158.2, 156.8, 141.1, 133.4, 128.6, 126.8, 125.6, 124.2, 123.9, 116.8, 110.0, 68.9, 66.7, 59.6, 58.9, 58.7, 53.3, 52.8, 46.8, 43.8, 38.6, 38.4, 29.0, 28.9, 24.9, 21.7, 21.3, 19.3; 19.1 ppm. HRESIMS  $m/z$  402.1794  $[\text{M}+\text{Na}]^+$  (calcd for  $\text{C}_{22}\text{H}_{25}\text{N}_3\text{O}_3\text{Na}$  402.1798); IR (neat):  $\nu = 3646, 2955, 1675, 1589, 1493, 1370, 760\text{ cm}^{-1}$ .

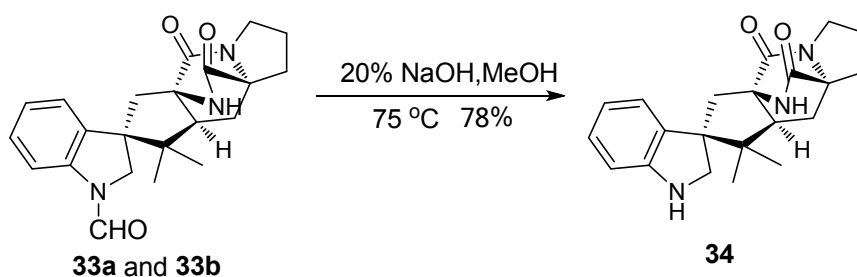

**(3'R,5aS,8aR,9aR)-8,8-dimethyl-2,3,6,8,8a,9-hexahydrospiro[5a,9a-(epiminomethano)cyclopenta[f]indolizine-7,3'-indoline]-5,10(1H)-dione **34****

To a solution of **33a** and **33b** (100 mg, 0.405 mmol) in MeOH (10 mL) at 0 °C was added 20% aqueous NaOH (2.5 mL). The reaction mixture was heated to 75°C and stirred for 4 hours. After completion of the reaction, it was cooled to room temperature and quenched by cold water at 0 °C and extracted with EtOAc (15 mL  $\times$



3). The combined organic phases were dried over Na<sub>2</sub>SO<sub>4</sub>, filtered, and concentrated in vacuum. The residue was purified by silica gel flash chromatography (EtOAc/petroleum 1:2 ) to afford **34** (72.2 mg, 78%) as a white solid.  $[\alpha]^{20}_D = -12.0$  (*c* 0.2, CH<sub>2</sub>Cl<sub>2</sub>); <sup>1</sup>H NMR (400 MHz, CDCl<sub>3</sub>) 7.11-7.07 (m, 2H), 6.76 (t, *J* = 7.2 Hz, 1H), 6.68 (d, *J* = 8.0 Hz, 1H ), 5.84 (s, 1H), 3.79 (d, *J* = 10.0 Hz, 1H), 3.47-3.40 (m, 3H), 2.89 (d, *J* = 15.6 Hz, 1H), 2.78-2.72 (m, 1H), 2.44 (t, *J* = 8.4 Hz, 1H), 2.20 (d, *J* = 15.6 Hz, 1H), 2.06-1.99 (m, 2H), 1.97-1.94 (m, 1H), 1.91-1.67 (m, 2H), 0.93 (s, 3H), 0.87 (s, 3H) ppm. <sup>13</sup>C NMR (150 MHz, CDCl<sub>3</sub>) δ 173.2, 170.2, 152.1, 129.9, 128.2, 125.6, 118.0, 110.0, 69.0, 66.8, 59.9, 53.1, 46.4, 43.8, 40.6, 31.9, 25.0, 22.6, 22.2, 19.6, 14.1 ppm. HRESIMS *m/z* 352.2025 [M+H]<sup>+</sup> (calcd for C<sub>21</sub>H<sub>26</sub>N<sub>3</sub>O<sub>2</sub> 325.2029). IR (neat): ν = 3521, 2917, 2849, 1651, 1261, 1018, 799 cm<sup>-1</sup>.

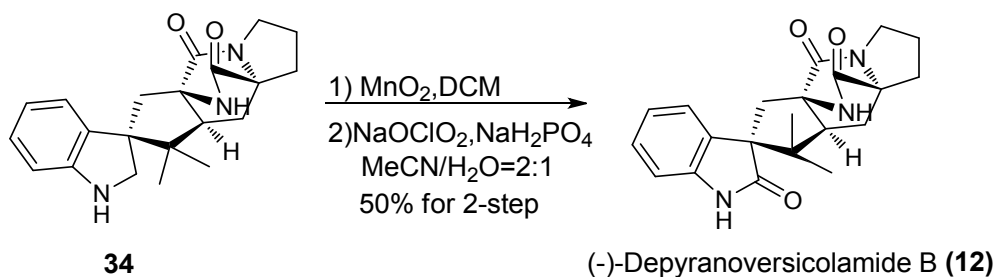

### Synthesis of (–)-Depyranoversicolamide B (**12**)

To a solution of **34** (20 mg, 0.057 mmol) in DCM (2 mL) was added MnO<sub>2</sub> (99 mg, 1.14 mmol ). The reaction mixture was stirred for 2 hours and then filtered and concentrated in vacuum. The residue was dissolved in a mixture of MeCN (1 mL) and H<sub>2</sub>O (0.5 mL) and added with NaOClO<sub>2</sub> (10.4 mg, 0.114 mmol) and NaH<sub>2</sub>PO<sub>4</sub> (18.0 mg, 0.114 mmol). The reaction mixture was stirred at room temperature for 3 hours. After completion of the reaction, it was quenched by addition of Na<sub>2</sub>S<sub>2</sub>O<sub>3</sub> at 0 °C and extracted with EtOAc (5 mL × 3). The combined organic phases were dried over Na<sub>2</sub>SO<sub>4</sub>, filtered, and concentrated in vacuum. The residue was purified by silica gel flash chromatography (EtOAc/petroleum 1:1 ) to afford (–)-depyranoversicolamide B (**12**) (10.4 mg, 50%) as a white solid.  $[\alpha]^{20}_D = -12.60$  (*c* 0.1, CH<sub>2</sub>Cl<sub>2</sub>). <sup>1</sup>H NMR (600 MHz, CD<sub>3</sub>OD: (CD<sub>3</sub>)<sub>2</sub>SO = 6:1 ) 7.43-7.40 (m, 1H ), 7.25 (t, *J* = 7.8 Hz, 1H ), 7.04 (t, *J* = 7.2 Hz, 1H ), 6.89 (d, *J* = 7.2 Hz, 1H ), 3.46-3.43 (m, 1H), 3.41-3.39 (m, 1H), 3.03

(dd,  $J = 15.6, 3.6$  Hz, 1H), 2.67-2.62 (m, 1H), 2.20 (dt,  $J = 15.0, 3.0$  Hz, 1H), 2.12-2.07 (m, 1H), 2.05-1.89 (m, 3H), 1.78 (dd,  $J = 13.2, 7.2$  Hz, 1H), 1.10 (s, 3H), 0.81 (s, 3H) ppm.  $^{13}\text{C}$  NMR (150 MHz,  $\text{CD}_3\text{OD}$ :  $(\text{CD}_3)_2\text{SO} = 6:1$ )  $\delta$  184.3, 178.3, 171.9, 143.6, 130.9, 129.6, 127.4, 122.6, 110.5, 70.7, 69.1, 64.3, 52.1, 49.3, 44.9, 35.2, 29.8, 29.3, 25.8, 23.5, 21.1 ppm. HRESIMS  $m/z$  388.1637  $[\text{M}+\text{Na}]^+$  (calcd for  $\text{C}_{21}\text{H}_{23}\text{N}_3\text{NaO}_3$  388.1641). IR (neat):  $\nu = 3613, 3290, 1699, 1572, 694\text{ cm}^{-1}$

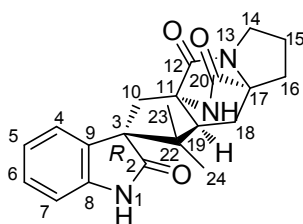

(-)-depyranoversicolamide B (**12**)

### 2D NMR spectrum data of (-)-depyranoversicolamide B (**12**)

| Position  | C     | H                                 | HMBC (H→C)            | H-H COSY        |
|-----------|-------|-----------------------------------|-----------------------|-----------------|
| <b>2</b>  | 184.2 | -                                 | -                     | -               |
| <b>3</b>  | 64.2  | -                                 | -                     | -               |
| <b>4</b>  | 127.4 | 7.43-7.40m                        | C6, C9                | H5              |
| <b>5</b>  | 122.6 | 7.04 (t, $J = 7.2$ Hz)            | C7, C8                | H4, H6          |
| <b>6</b>  | 129.6 | 7.25 (t, $J = 7.8$ Hz)            | C4, C9                | H5, H7          |
| <b>7</b>  | 110.5 | 6.89 (d, $J = 7.2$ Hz)            | C5, C8                | H6              |
| <b>8</b>  | 130.9 | -                                 | -                     | -               |
| <b>9</b>  | 143.6 | -                                 | -                     | -               |
| <b>10</b> | 35.2  | 3.03 (dd, $J = 15.6, 3.6$ Hz) (a) | C2, C3, C11, C12, C22 | H10b            |
|           |       | 2.20 (dt, $J = 15.0, 3.0$ Hz) (b) | C2, C3, C11, C19      | H10a            |
| <b>11</b> | 69.1  | -                                 | -                     | -               |
| <b>12</b> | 171.9 | -                                 | -                     | -               |
| <b>14</b> | 44.9  | 3.46-4.43m                        | C16                   | H15a, H16b      |
| <b>15</b> | 25.8  | 2.12-2.07 m (a)                   | C14, C16, C17         | H14, H15b, H16b |
|           |       | 2.00-1.95 m (b)                   | C14, C16, C17         | H14, H15a, H16b |

|           |       |                                   |                            |                     |
|-----------|-------|-----------------------------------|----------------------------|---------------------|
| <b>16</b> | 29.8  | 2.67-2.62 m (a)                   | C14, C15, C17, C18,<br>C20 | H16b                |
|           |       | 1.94-1.89 m (b)                   | C14, C15, C17, C18,<br>C20 | H16a, H15a,<br>H15b |
| <b>17</b> | 70.7  | -                                 | -                          | -                   |
| <b>18</b> | 29.3  | 2.05-2.00 m (a)                   | C11, C16, C17, C20         | H18b, H19           |
|           |       | 1.78 (dd, $J = 13.2, 7.2$ Hz) (b) | C11, C17, C19, C20         | H18a, H19           |
| <b>19</b> | 52.1  | 3.41-3.39 m                       | C12, C18, C22, C23,<br>C24 | H18a, H18b          |
| <b>20</b> | 178.3 | -                                 | -                          | -                   |
| <b>22</b> | 49.3  | -                                 | -                          | -                   |
| <b>23</b> | 21.1  | 1.10 s                            | C3, C10, C19, C22,<br>C24  | -                   |
| <b>24</b> | 23.5  | 0.81 s                            | C3, C10, C19, C22,<br>C23  | -                   |

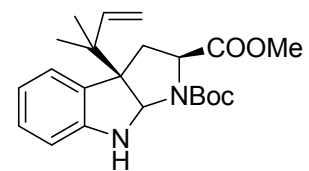

**N2-Boc pyrroloindoline**

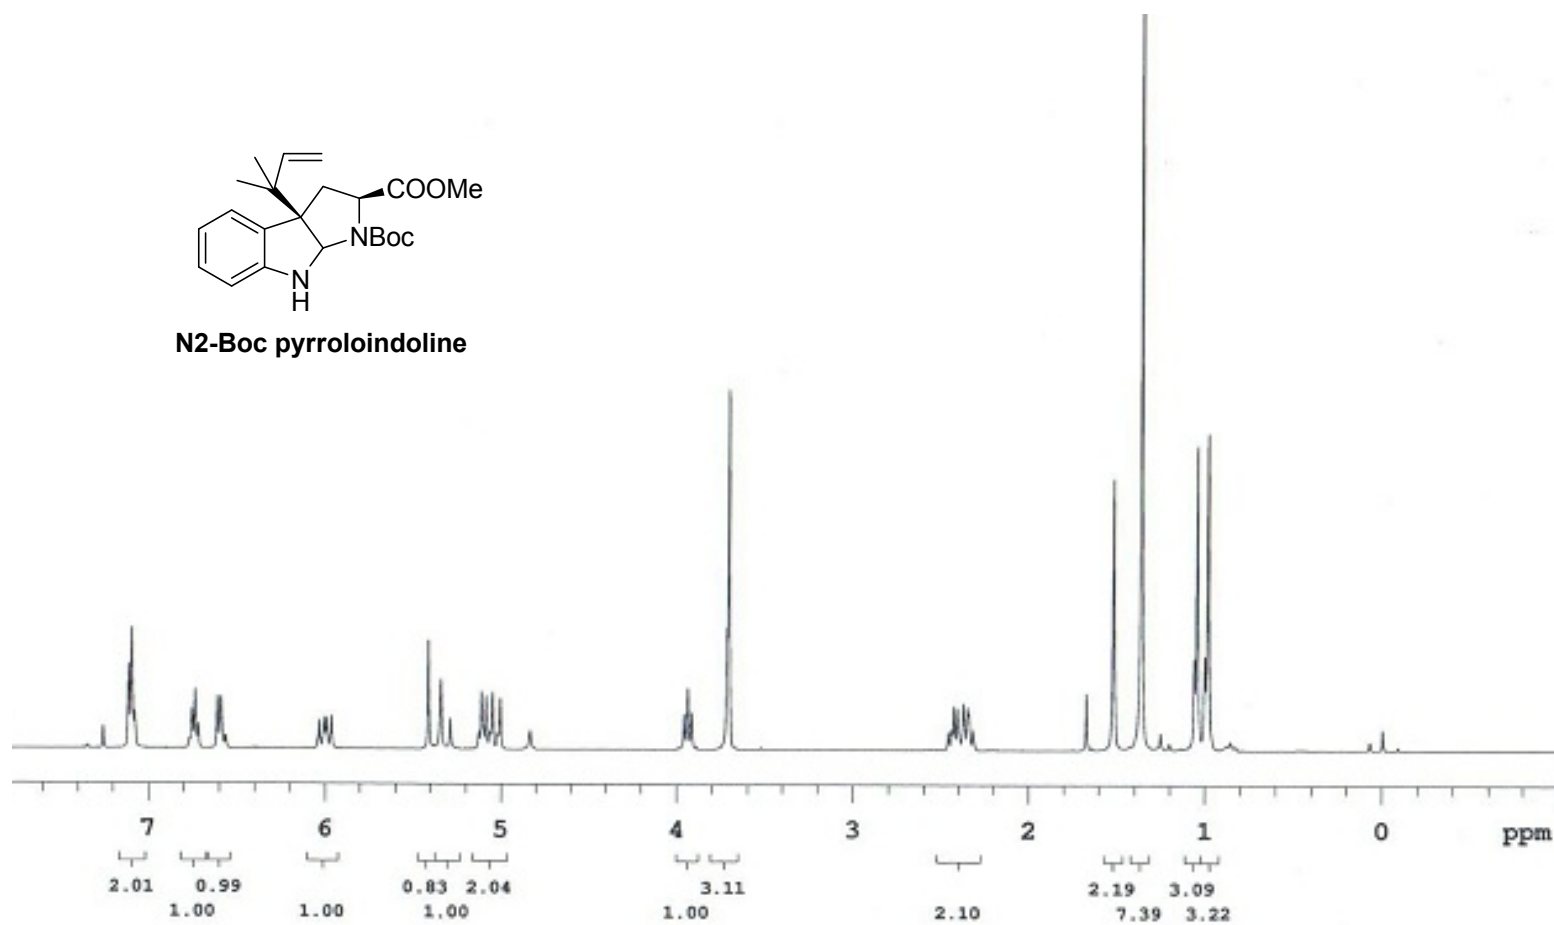

<sup>1</sup>H NMR spectrum of compound **N2-Boc pyrroloindoline**

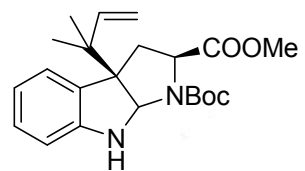

**N2 -Boc pyrroloindoline**

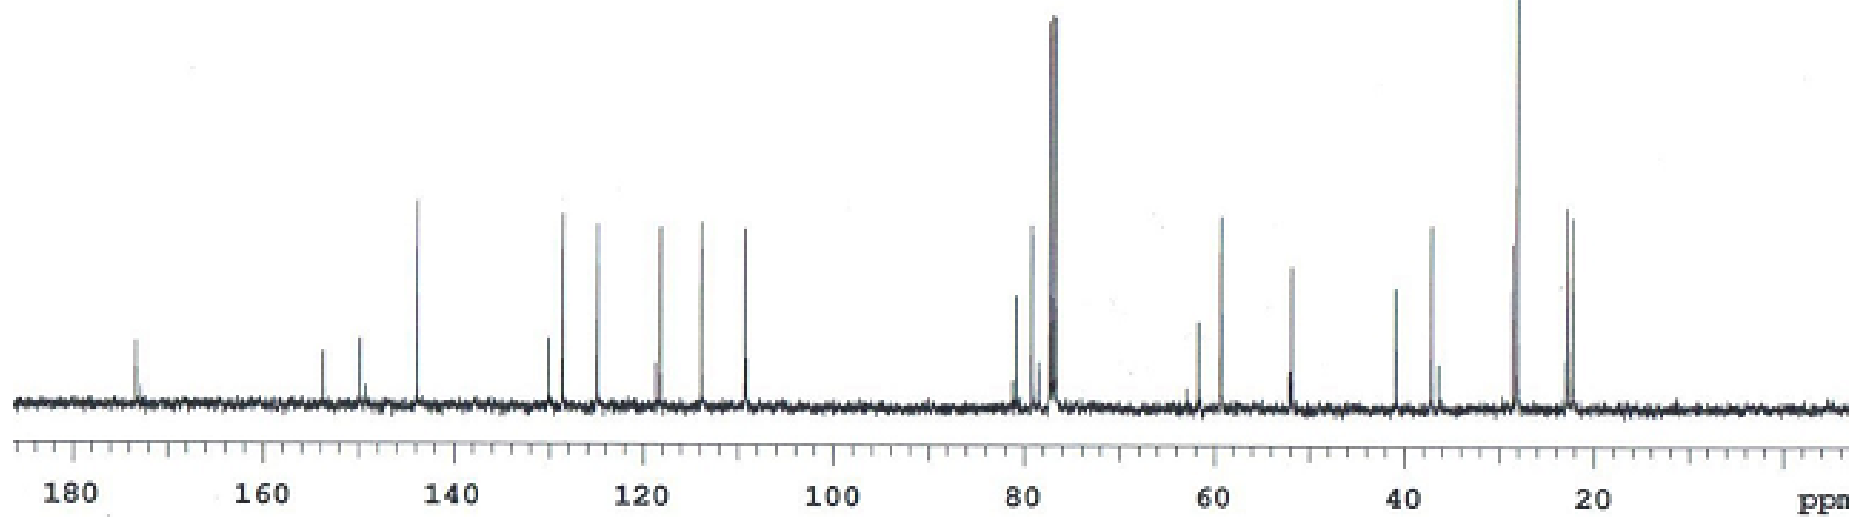

$^{13}\text{C}$  NMR spectrum of compound **N2-Boc pyrroloindoline**

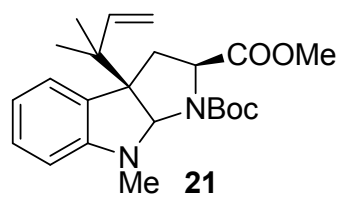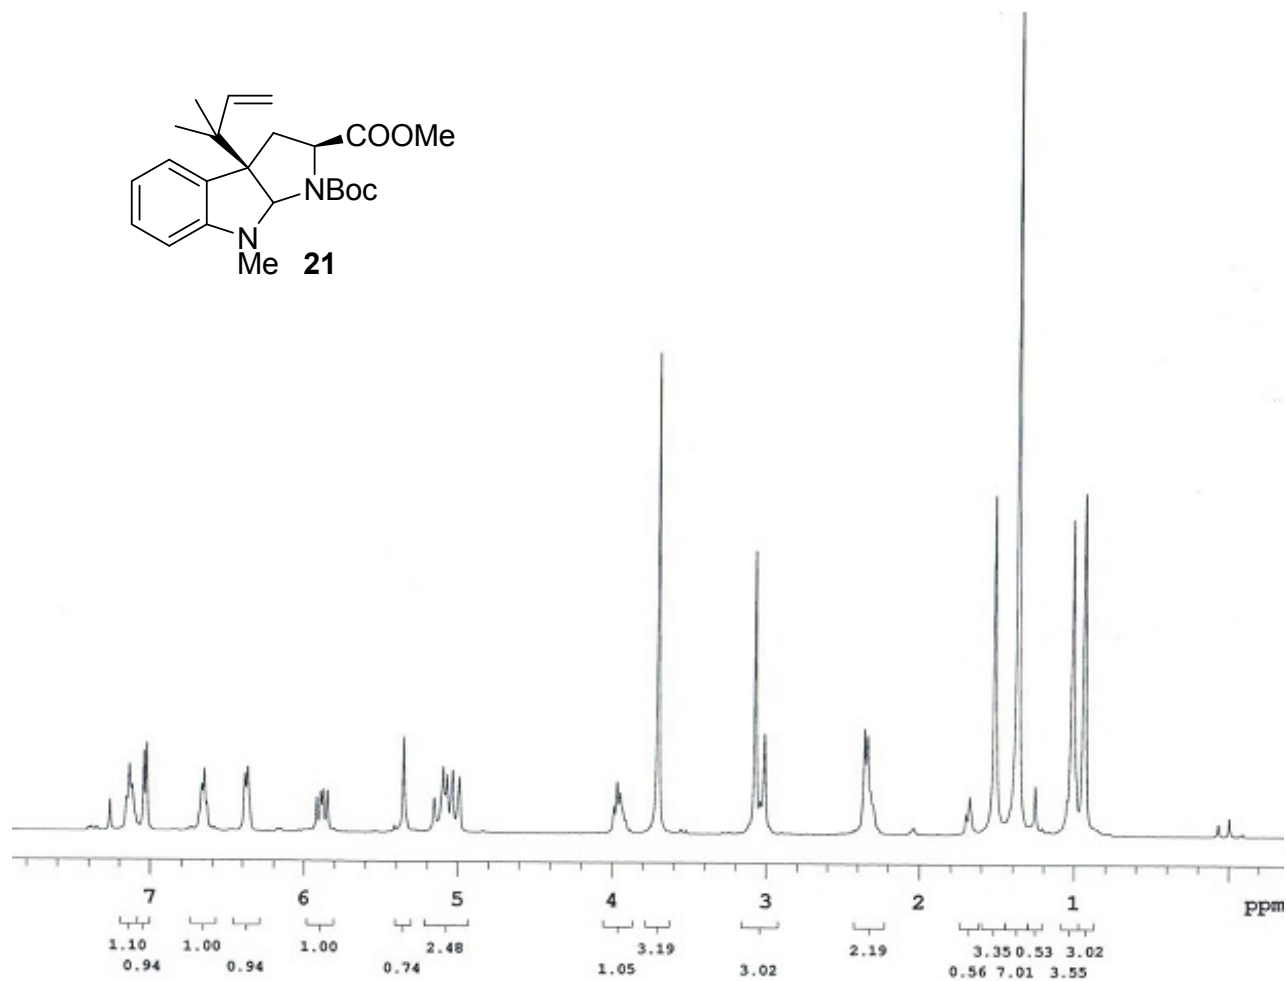

<sup>1</sup>H NMR spectrum of compound **21**

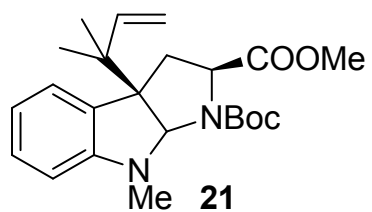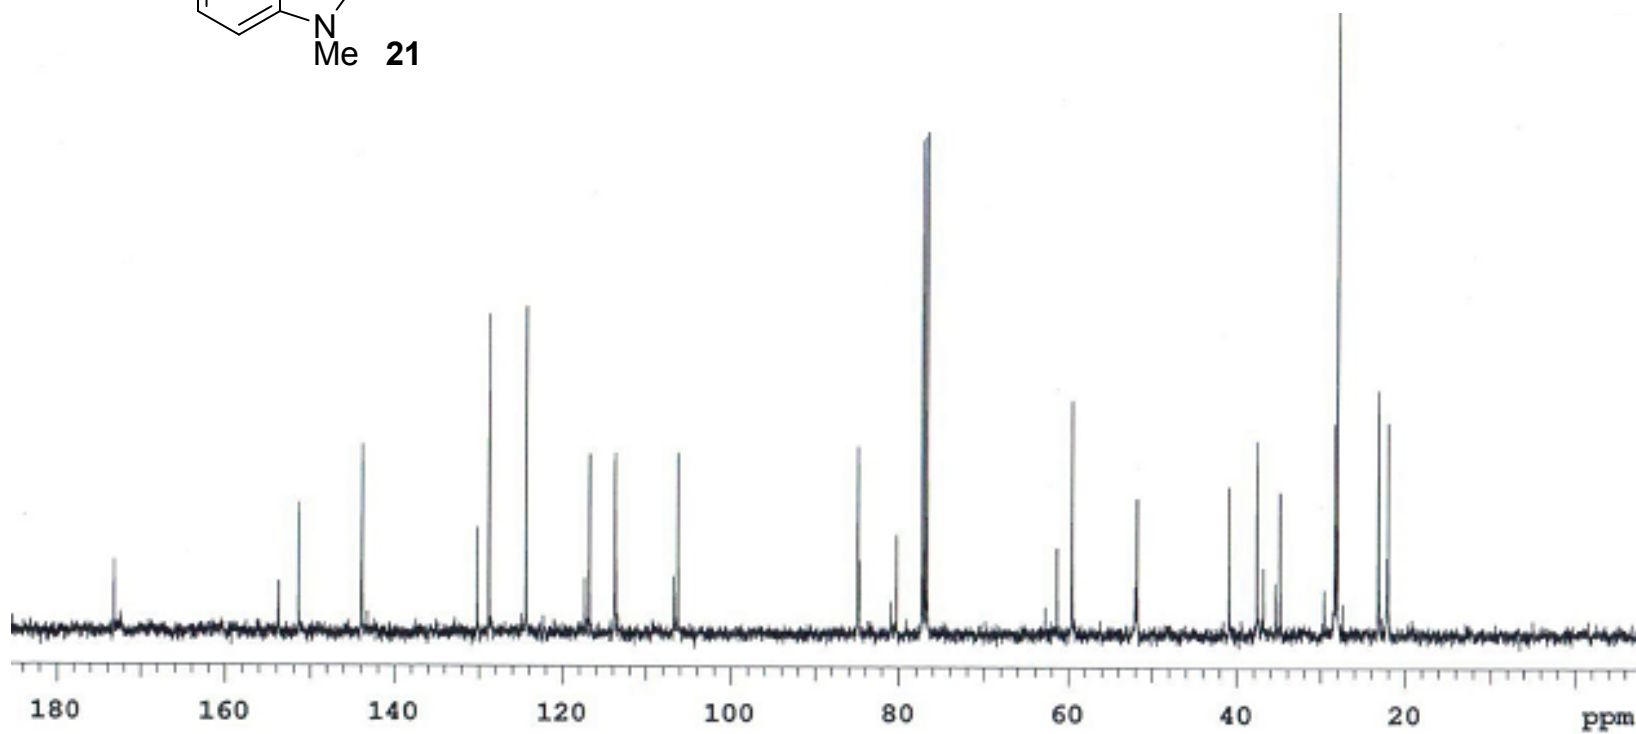

$^{13}\text{C}$  NMR spectrum of compound **21**

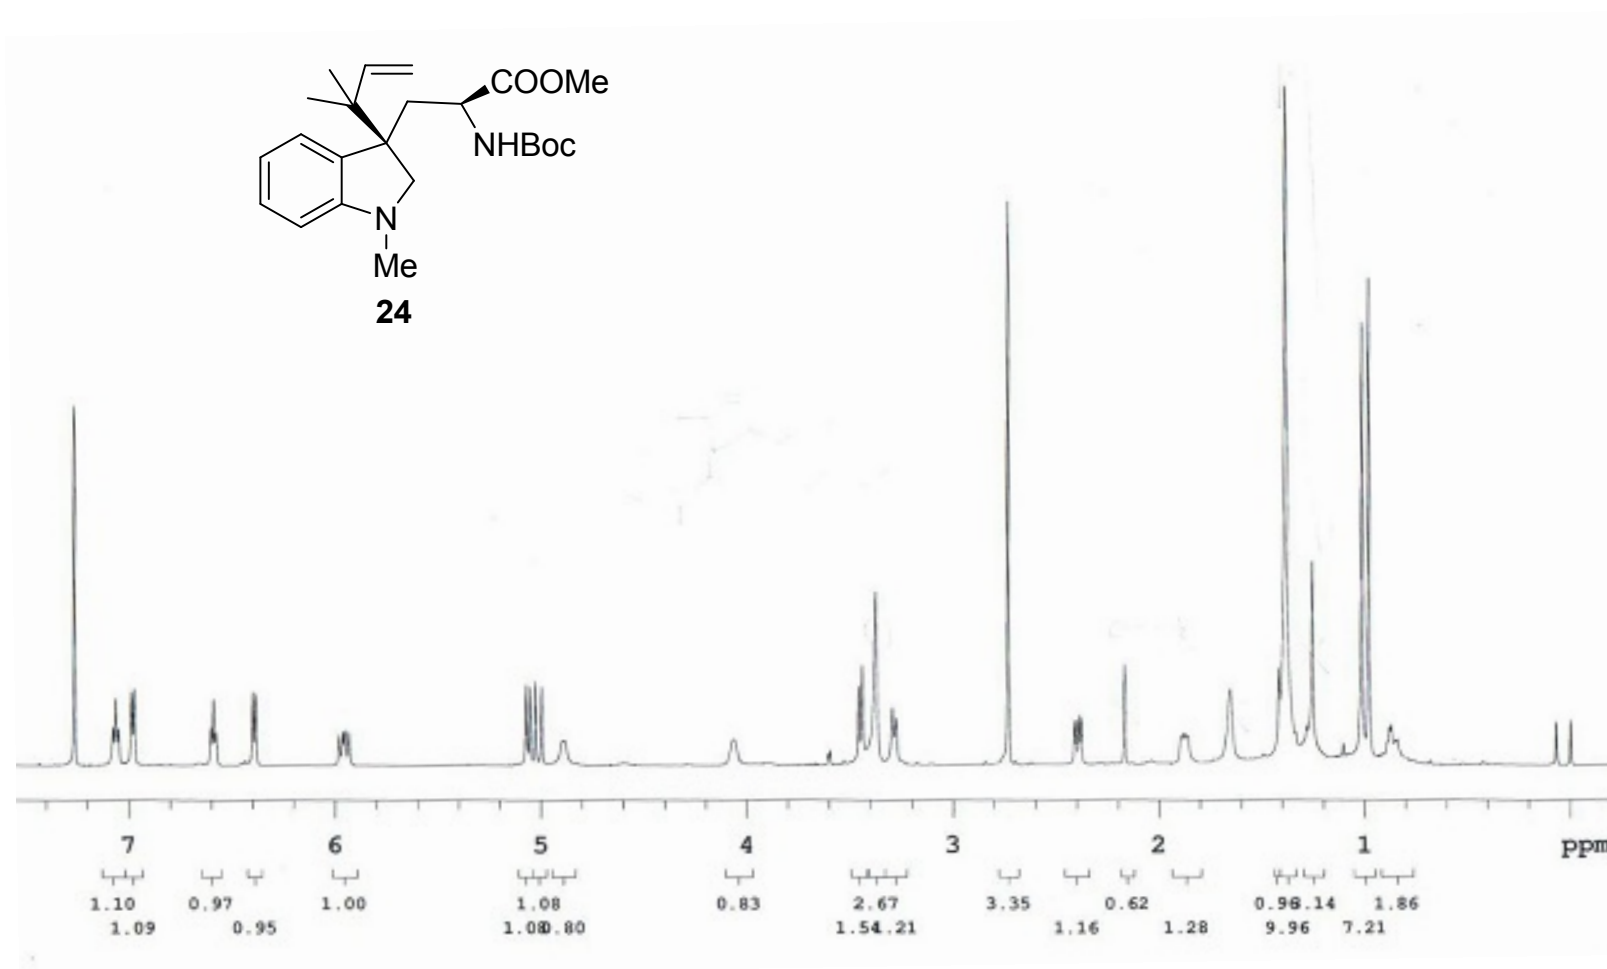

$^1\text{H}$  NMR spectrum of compound **24**



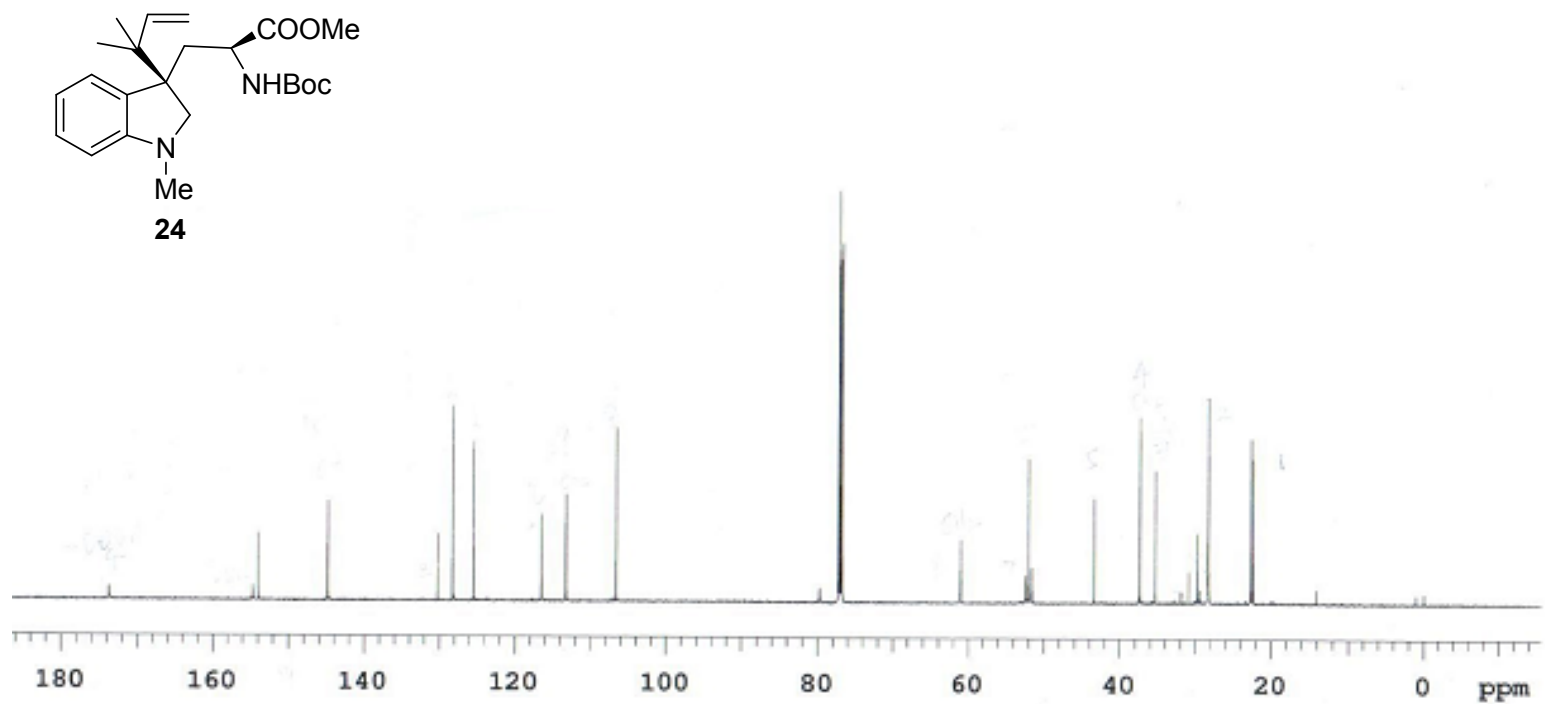

$^{13}\text{C}$  NMR spectrum of compound **24**

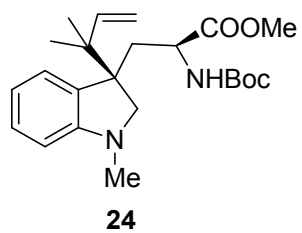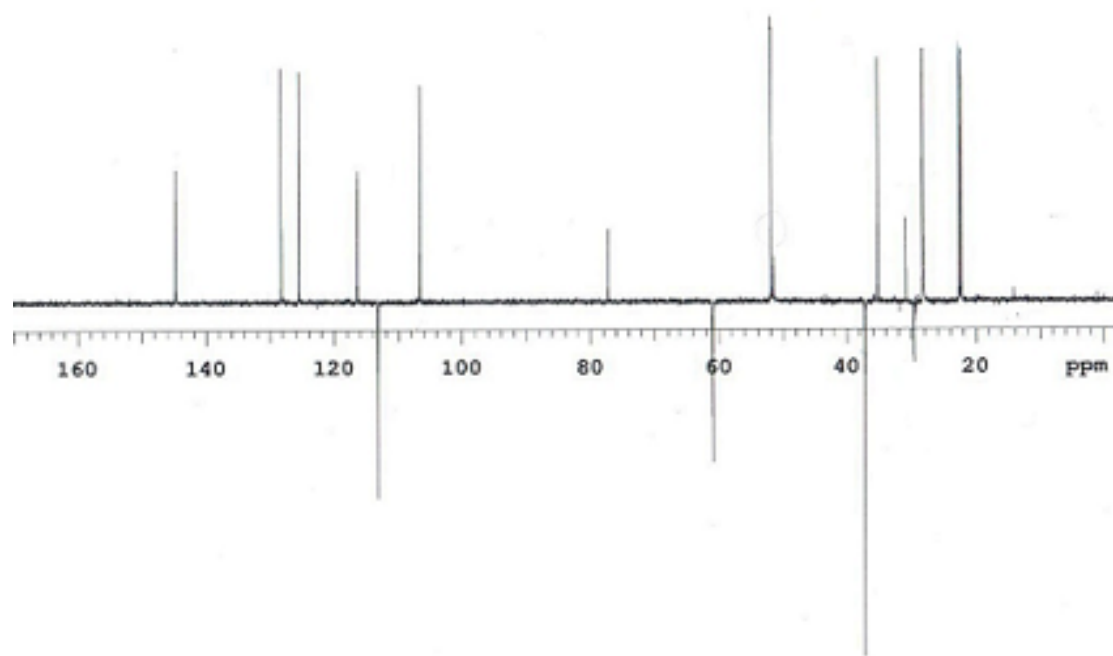

DEPT spectrum of compound 24

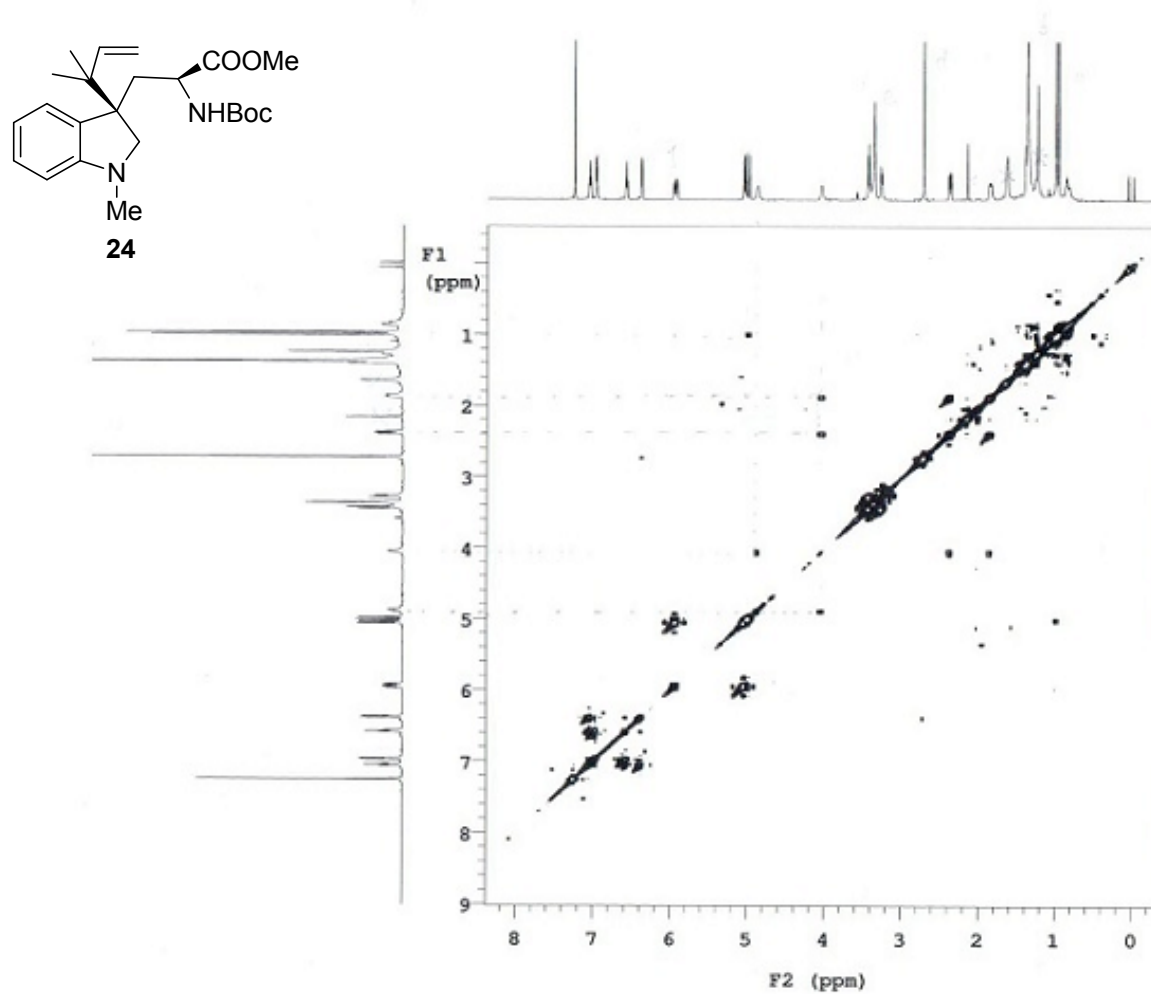

gCOSY spectrum of compound **24**

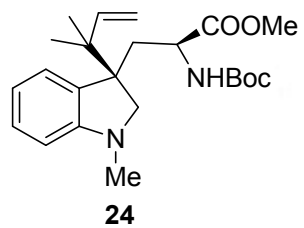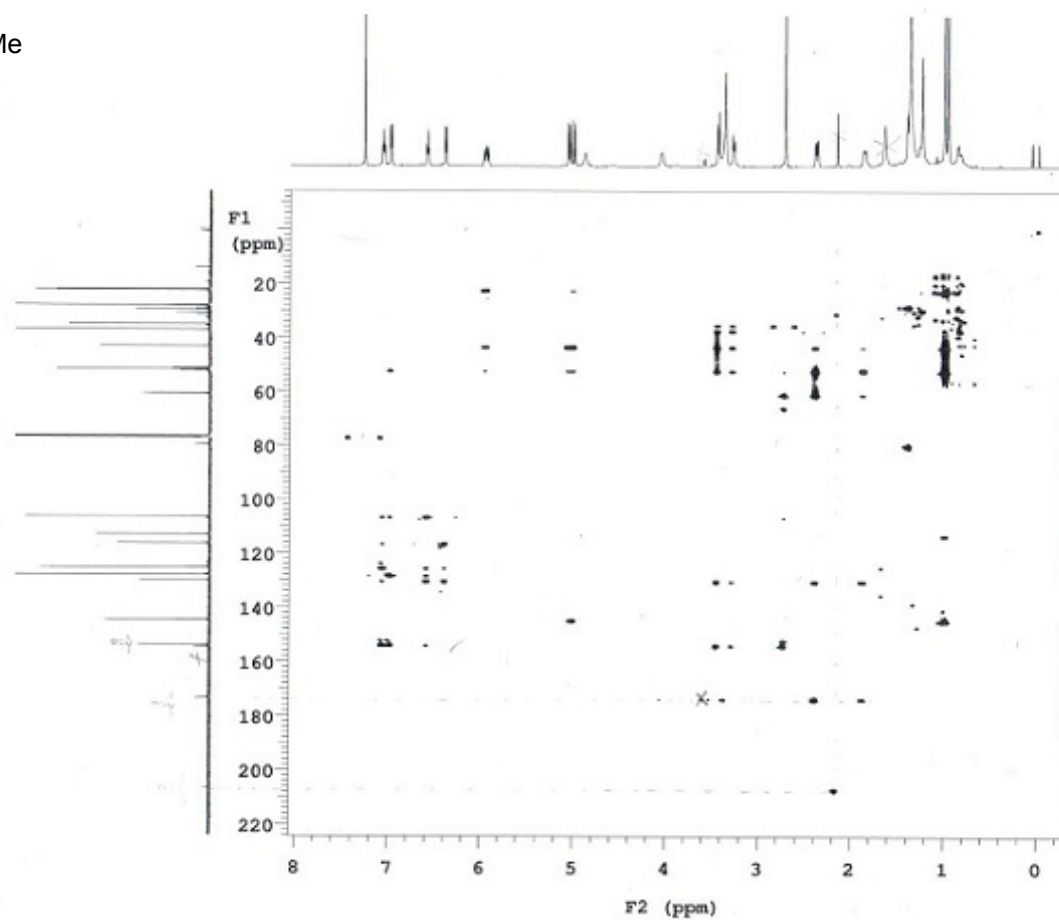

gHMBC spectrum of compound **24**

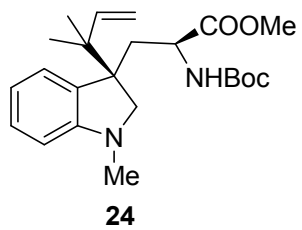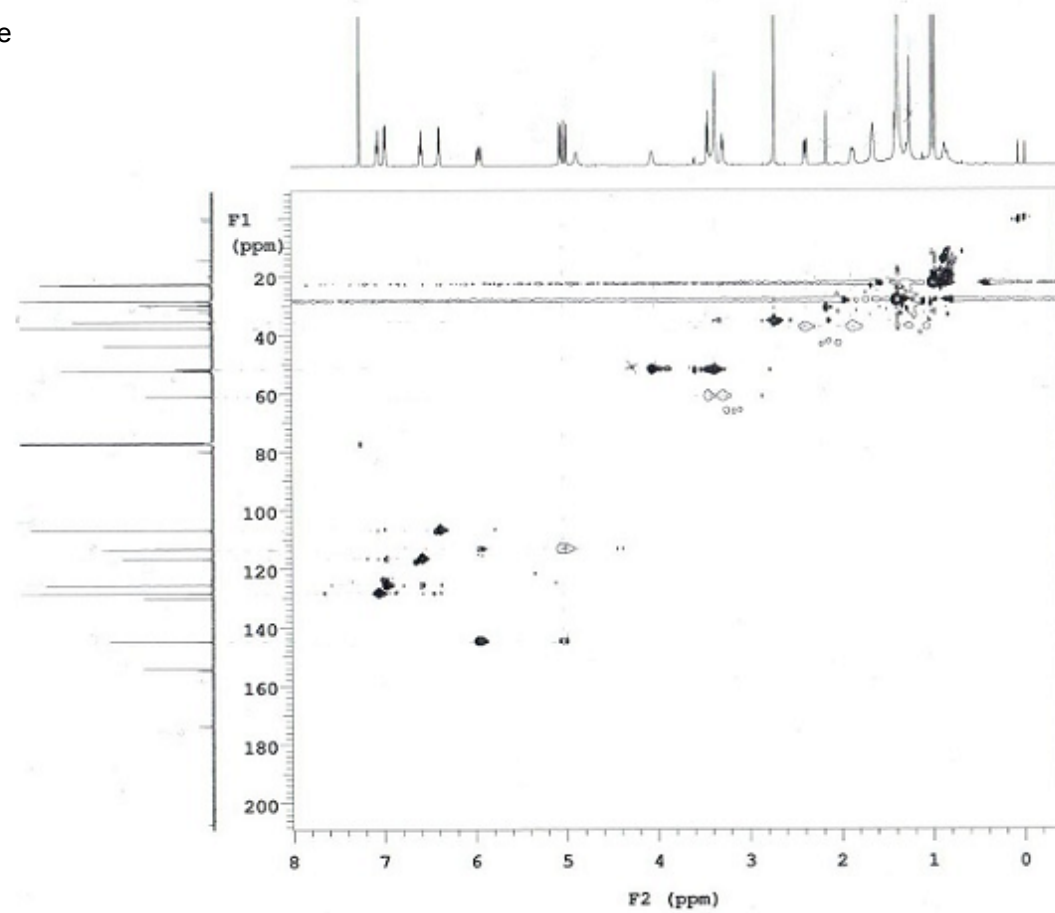

gHMQC spectrum of compound **24**

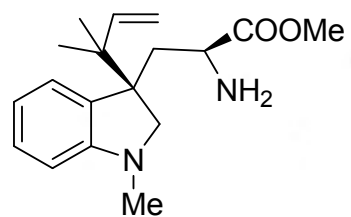

**C3-isoprenylated indoline**

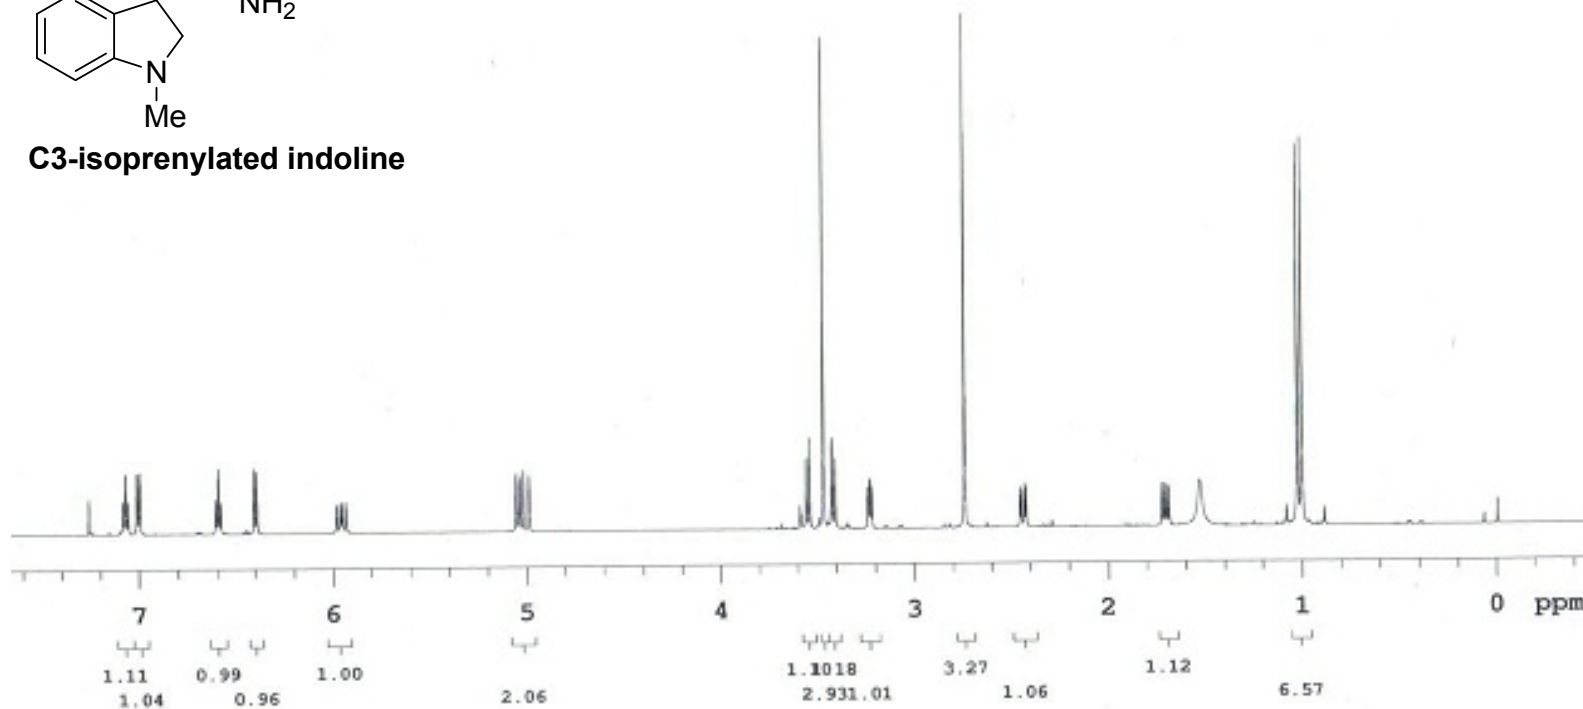

**$^1\text{H}$  NMR spectrum of C3-isoprenylated indoline**

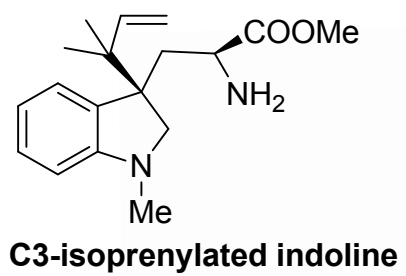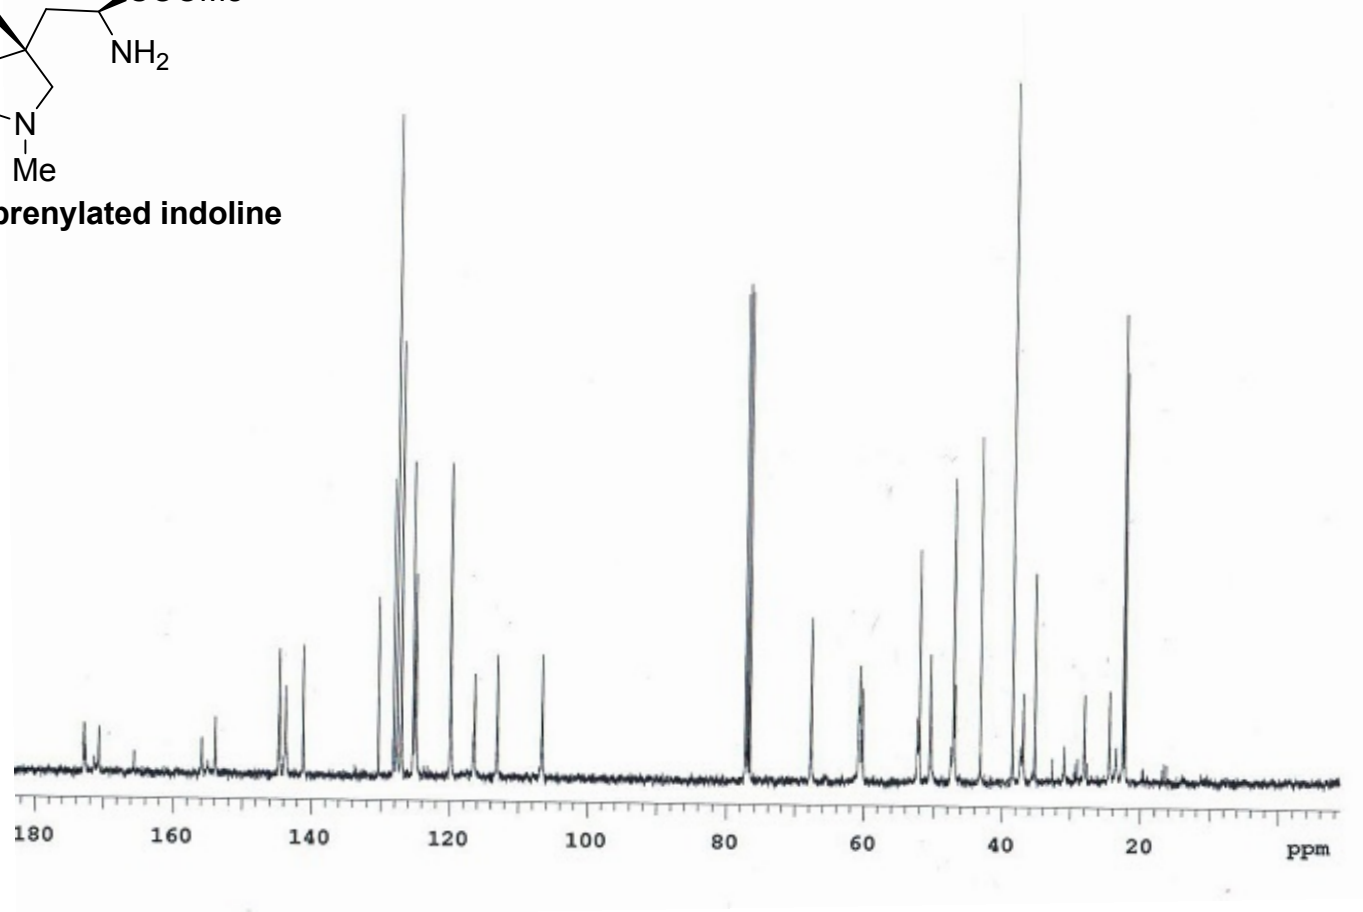

$^{13}\text{C}$  NMR spectrum of C3-isoprenylated indoline

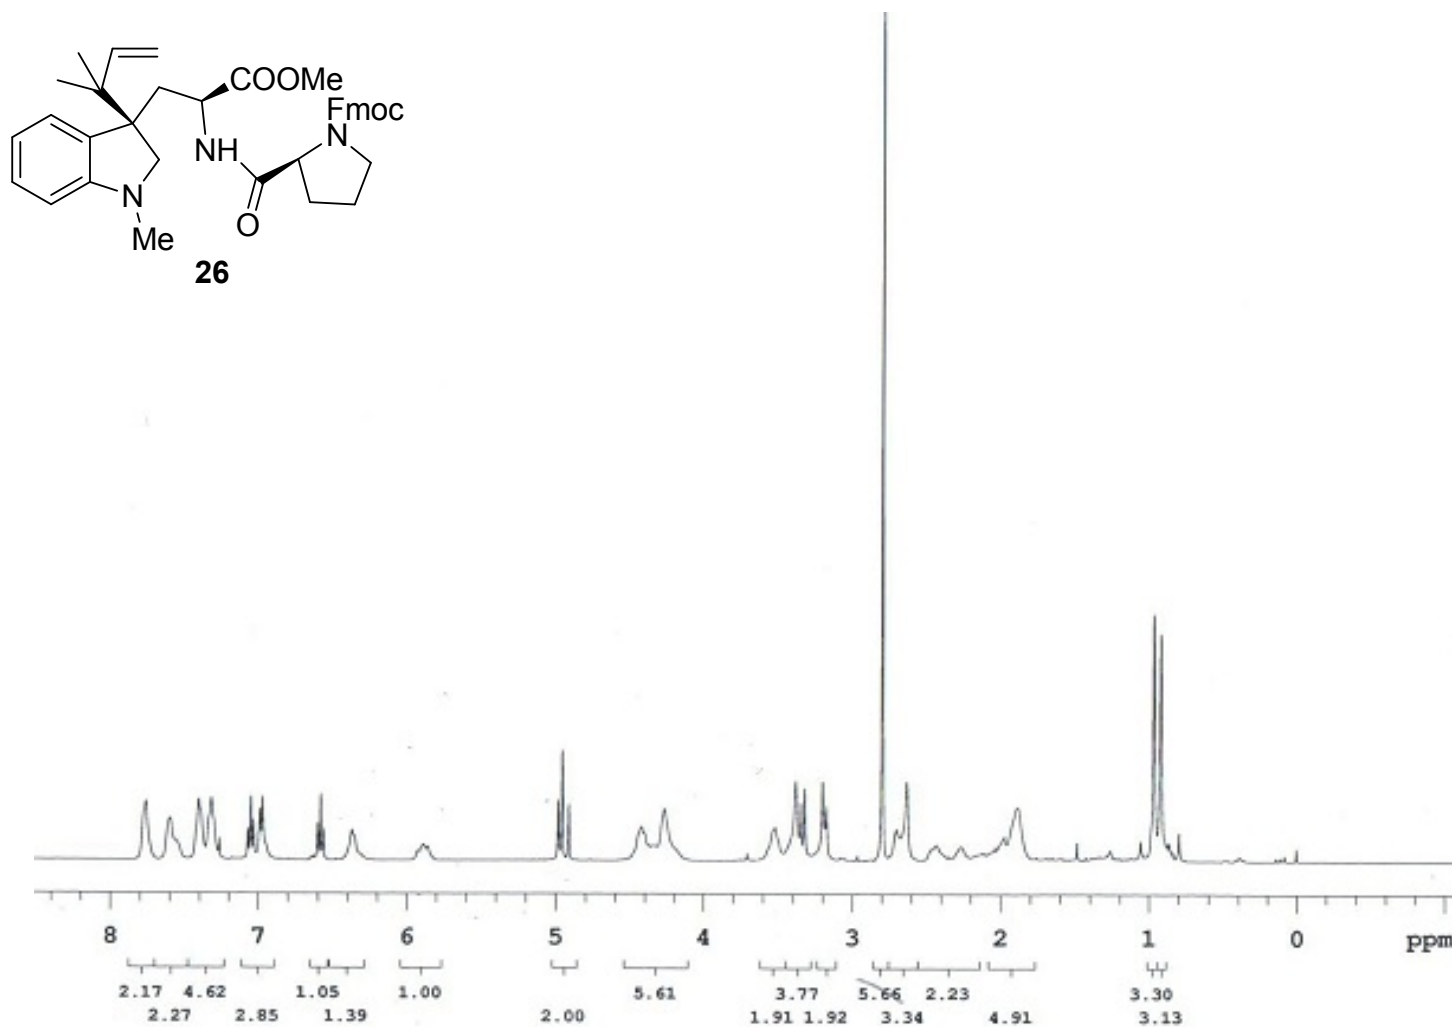

$^1\text{H}$  NMR spectrum of compound **26**



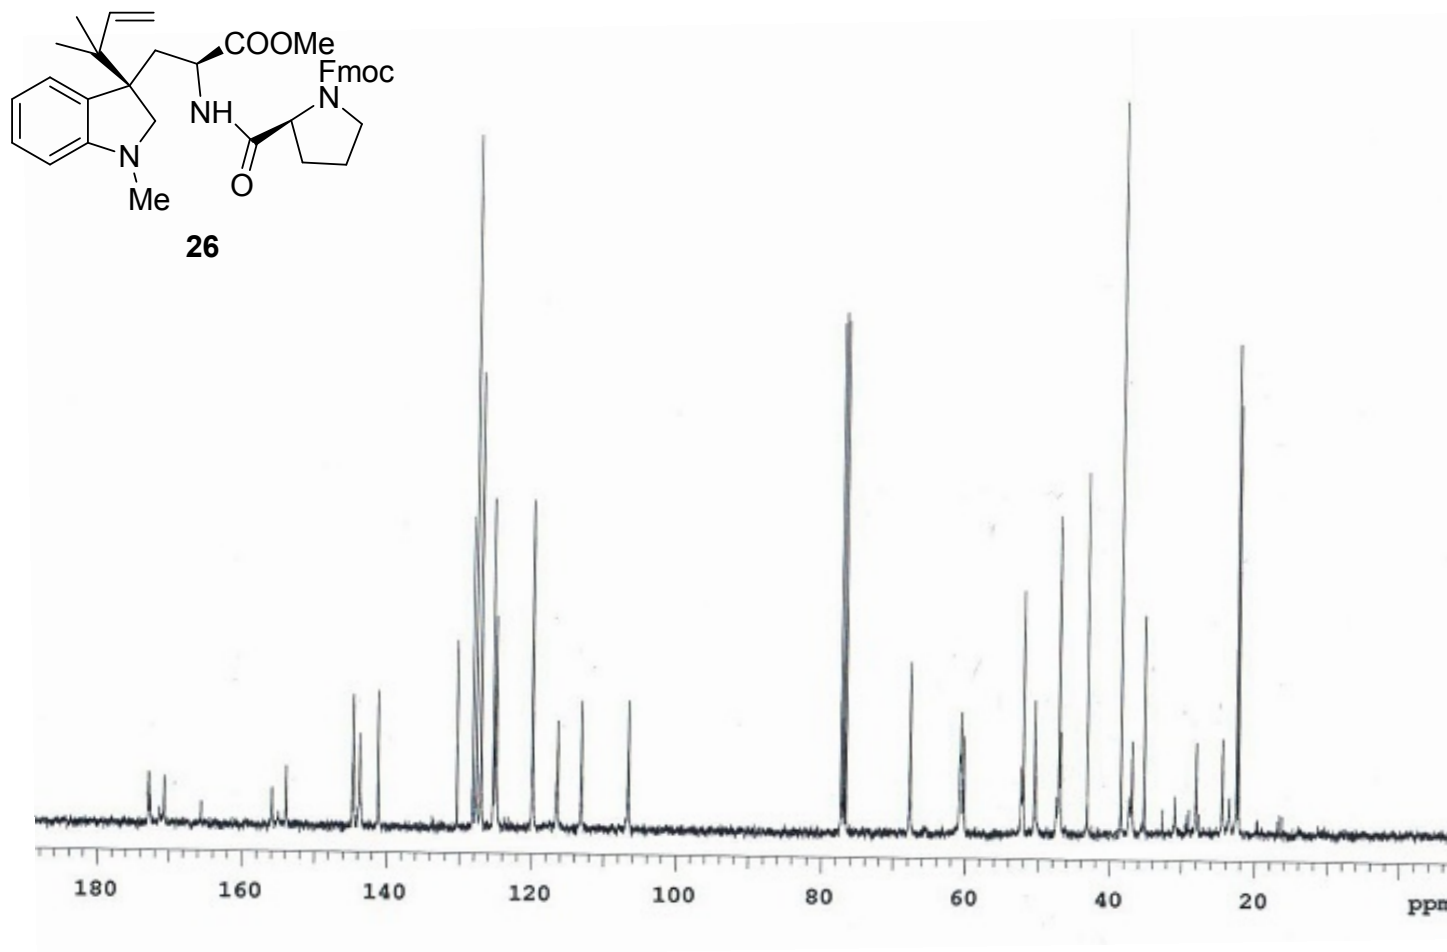

$^{13}\text{C}$  NMR spectrum of compound **26**

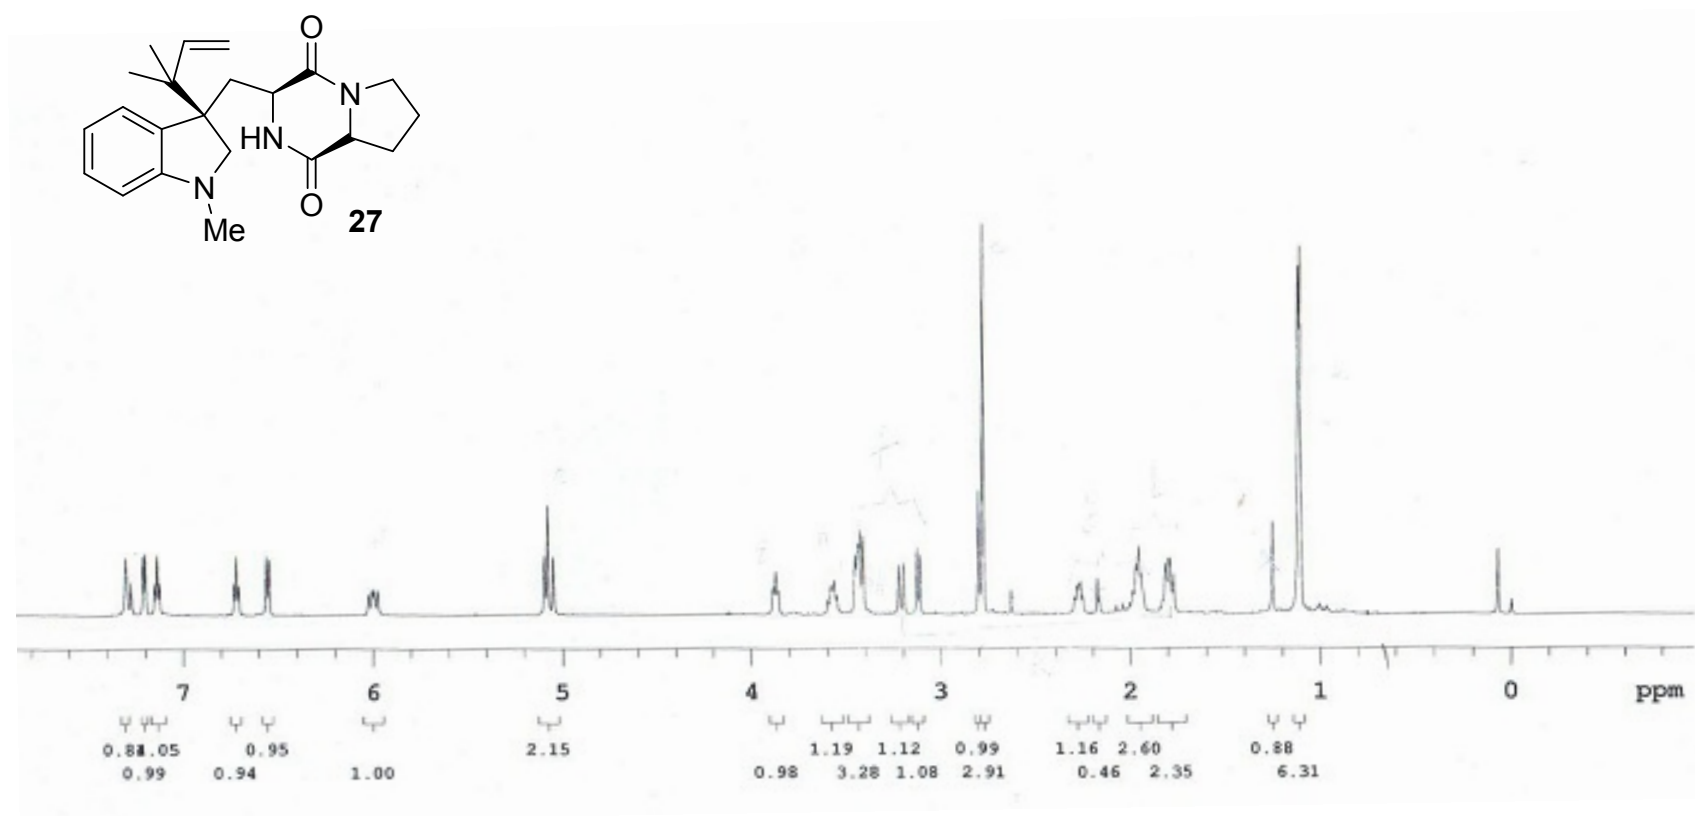

$^1\text{H}$  NMR spectrum of compound **27**

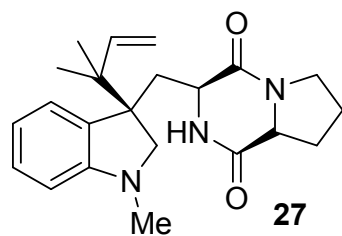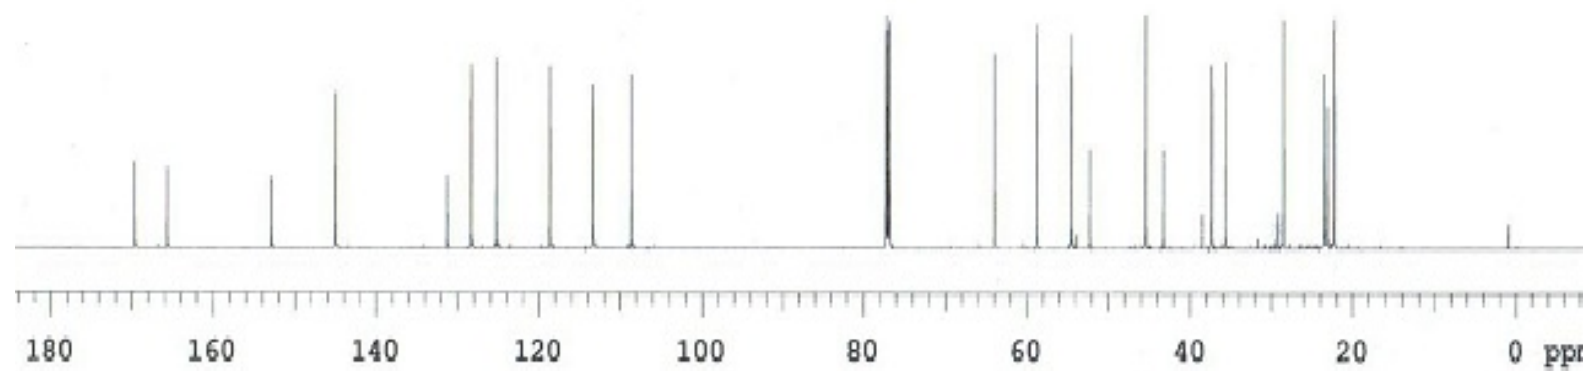

<sup>13</sup>C NMR spectrum of compound **27**

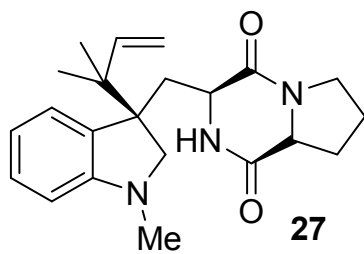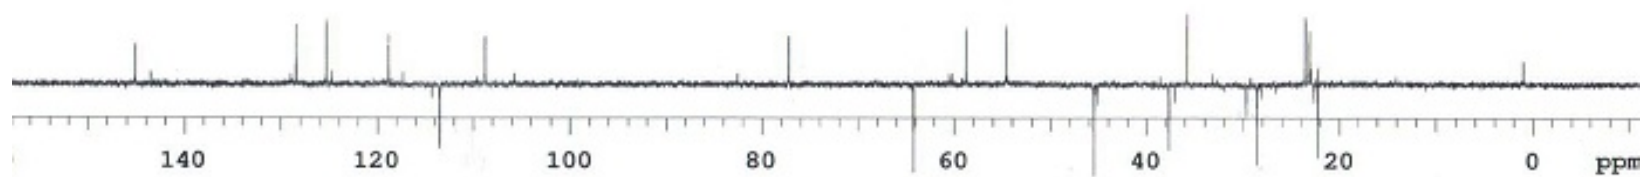

DEPT spectrum of compound **27**

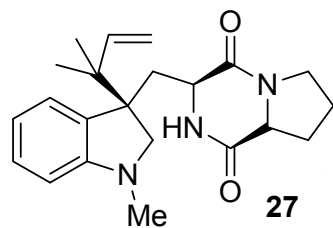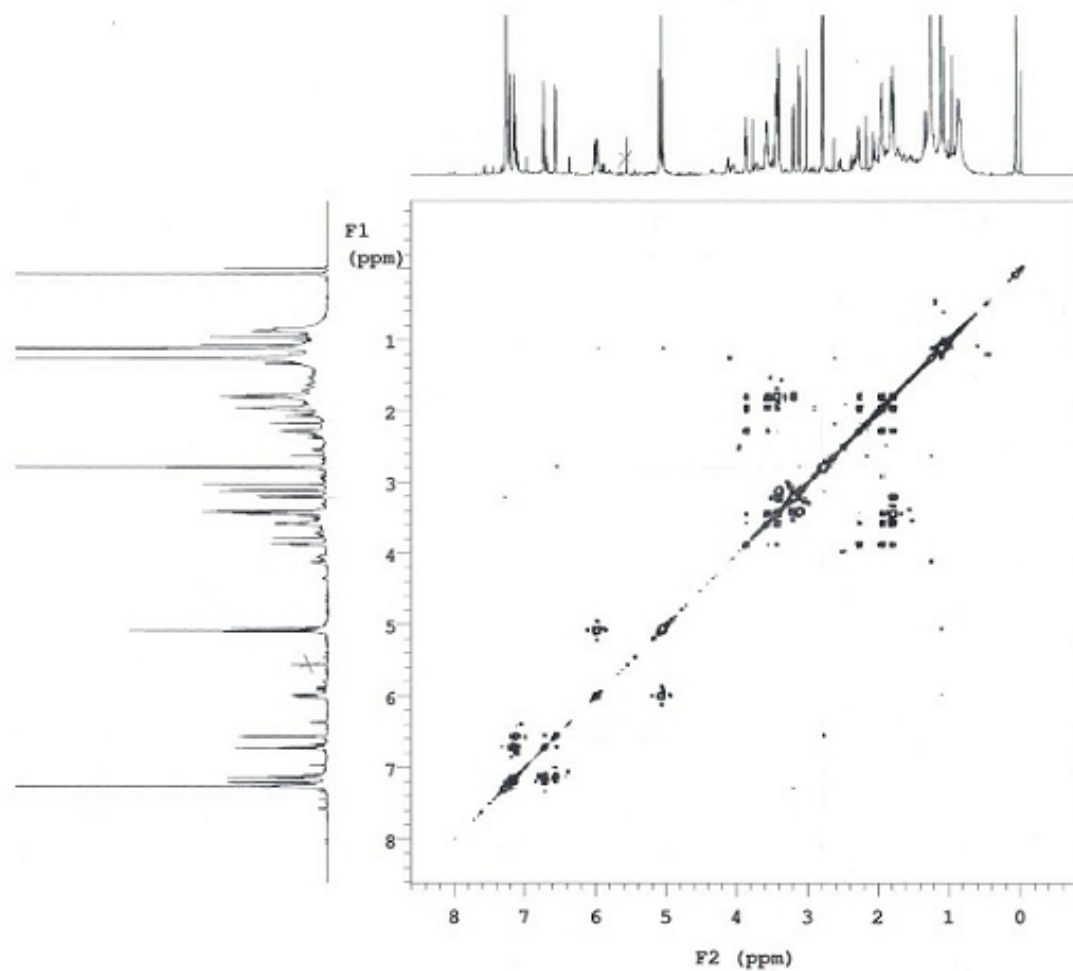

gCOSY spectrum of compound **27**

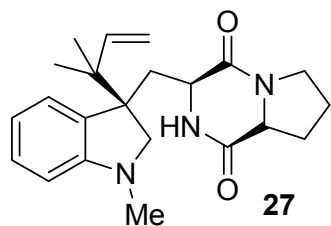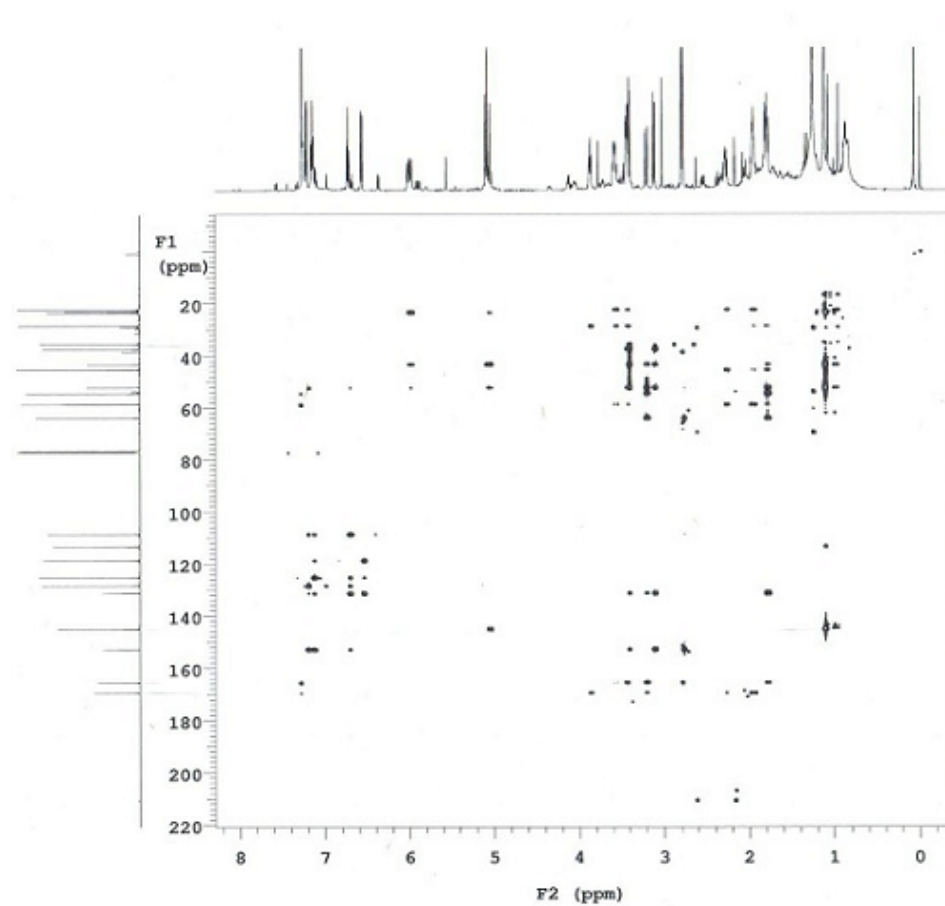

gHMBC spectrum of compound **27**

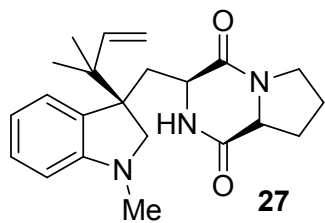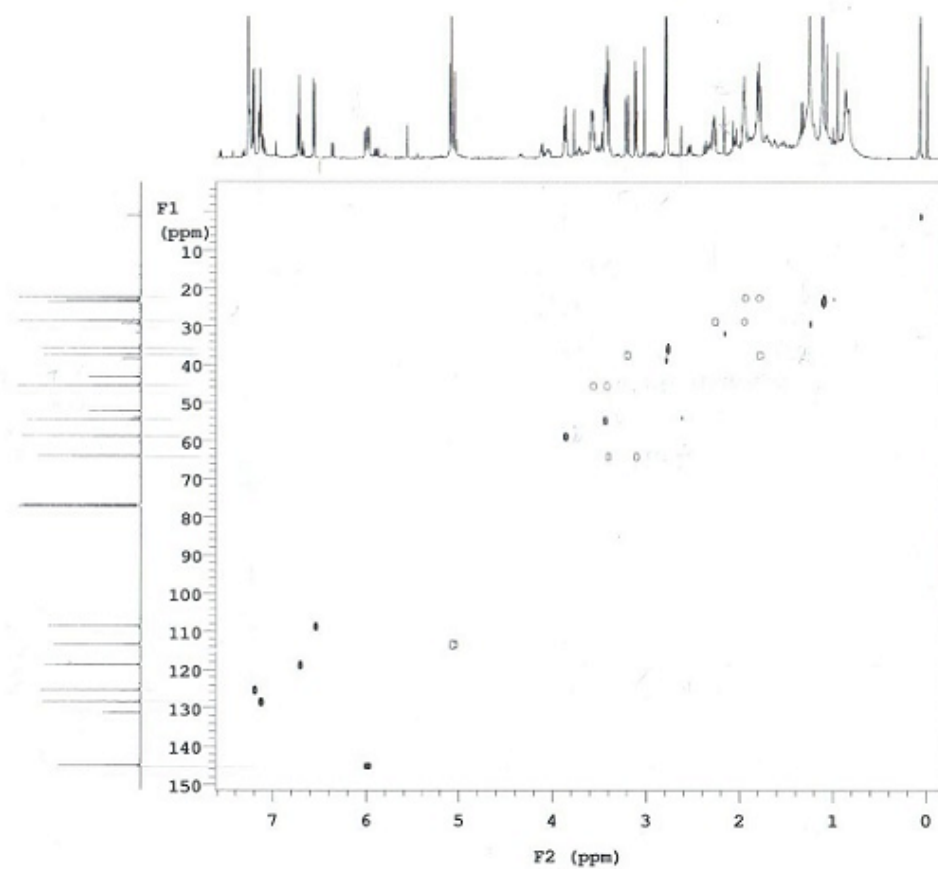

gHMQC spectrum of compound **27**

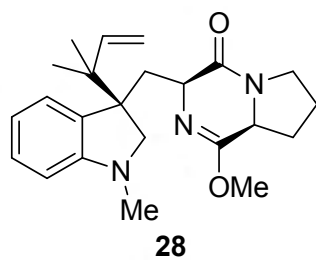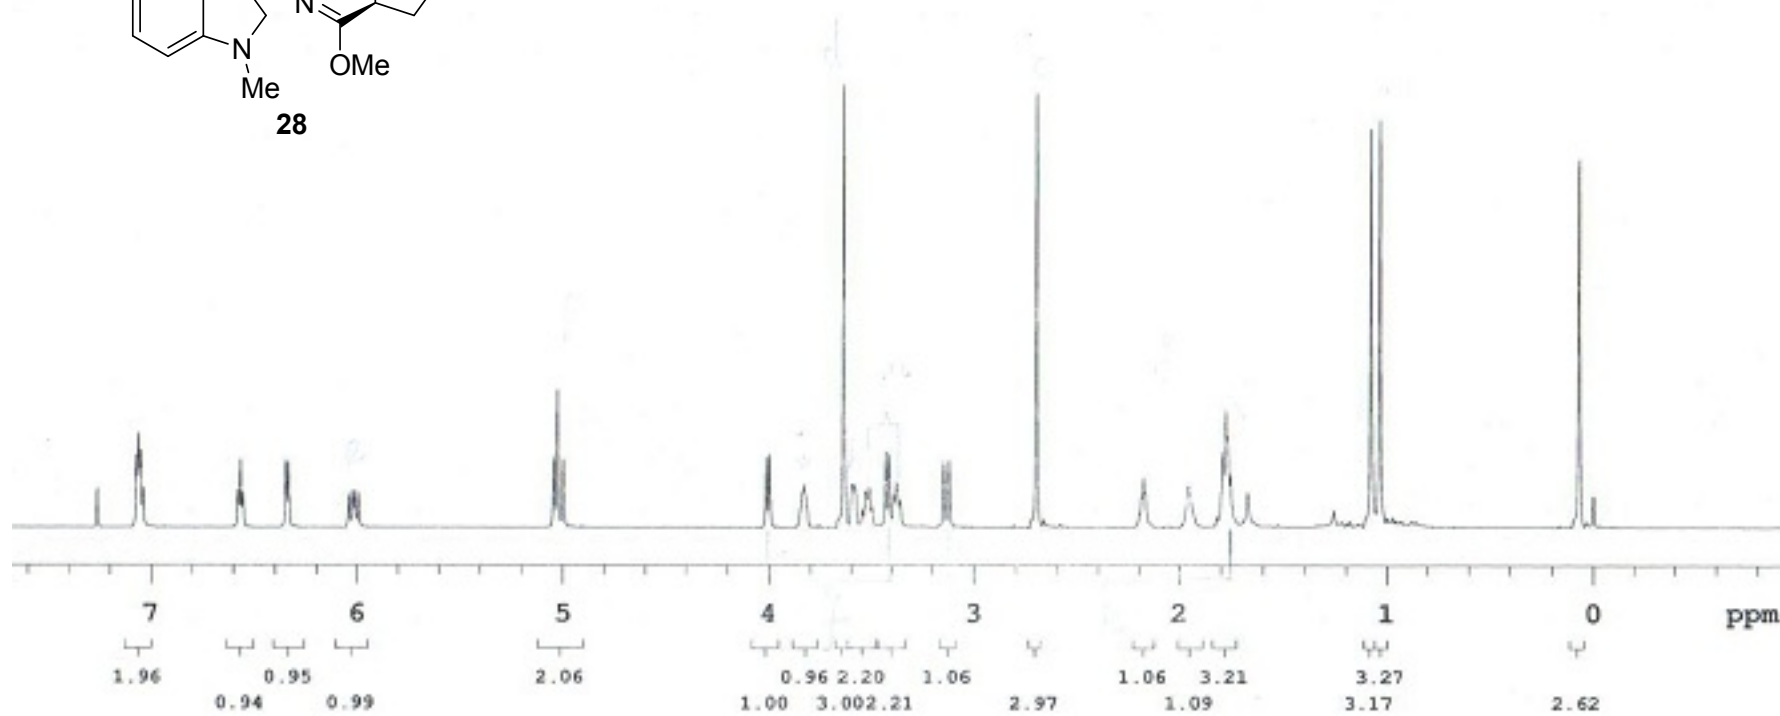

$^1\text{H}$  NMR spectrum of compound **28**



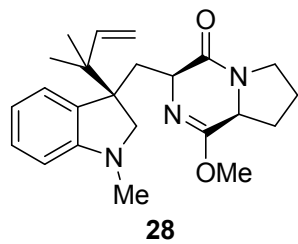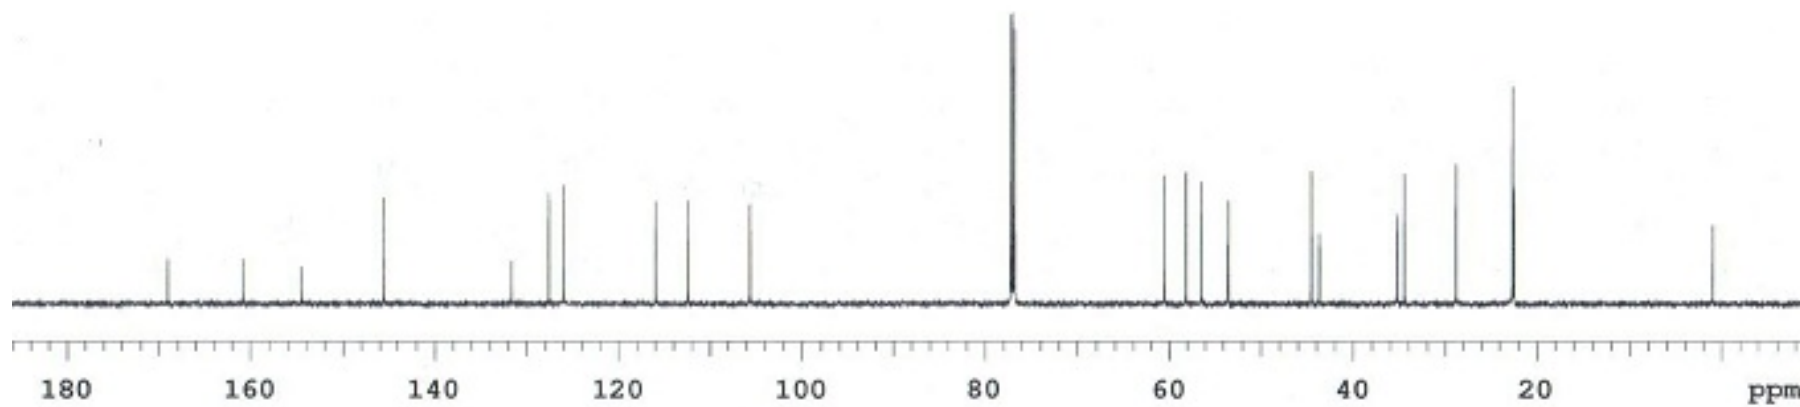

$^{13}\text{C}$  NMR spectrum of compound **28**

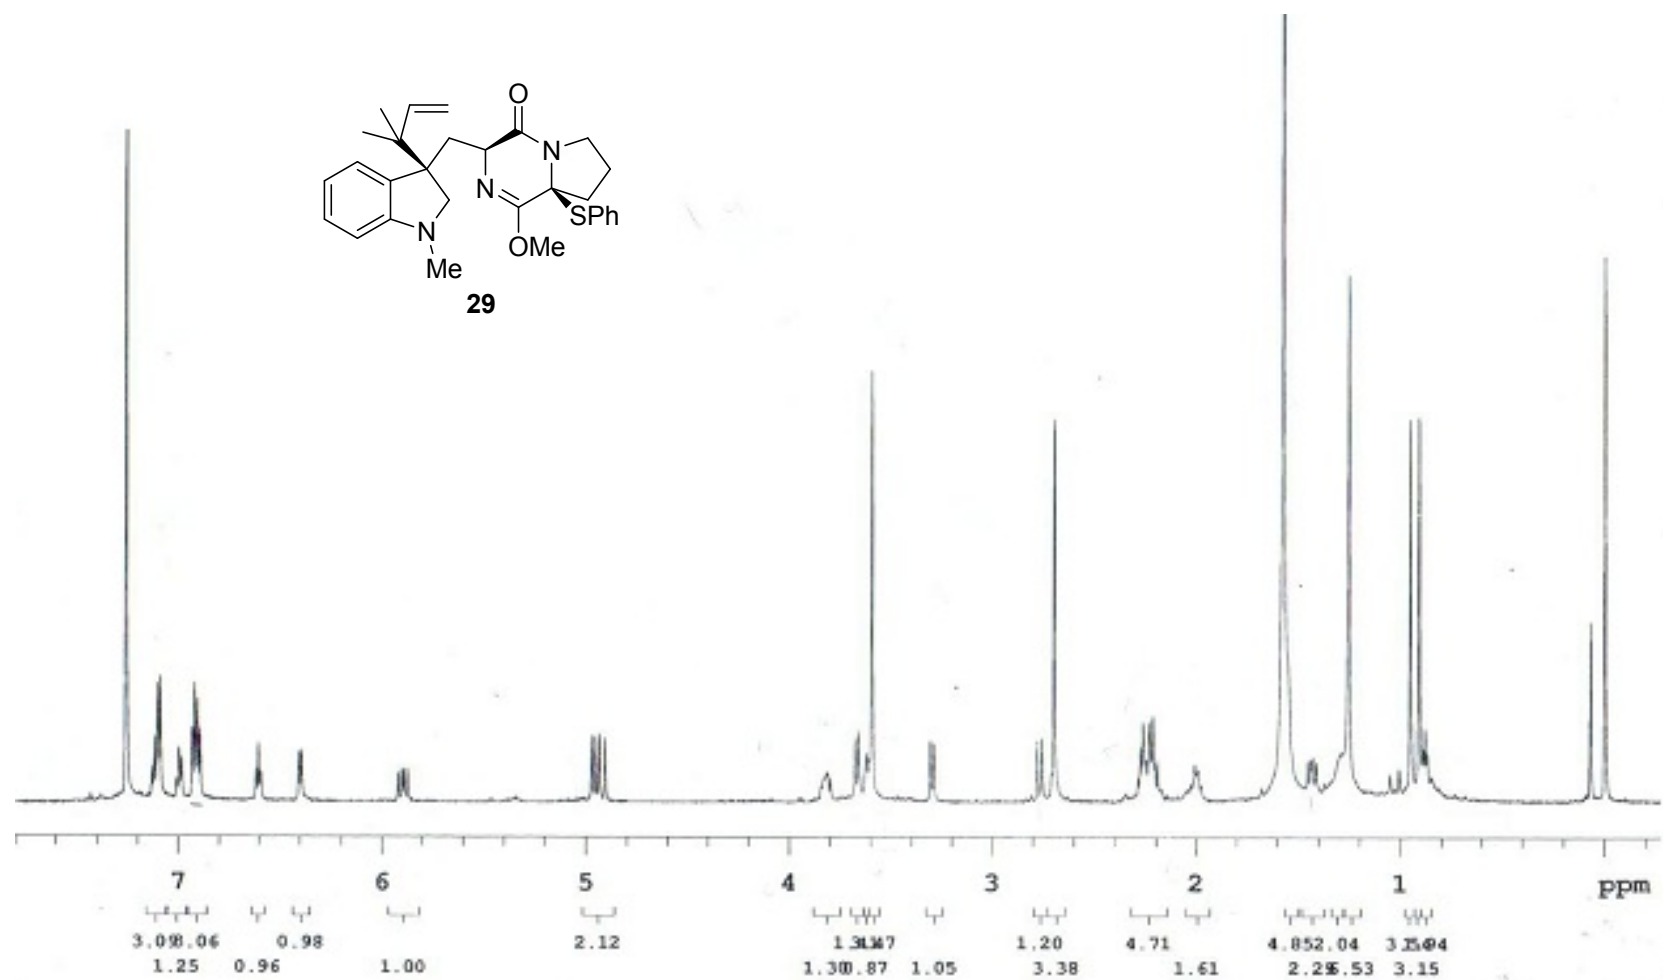

$^1\text{H}$  NMR spectrum of compound **29**

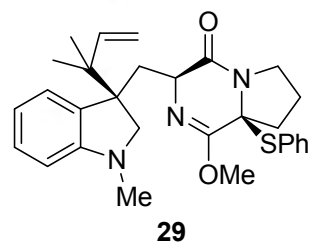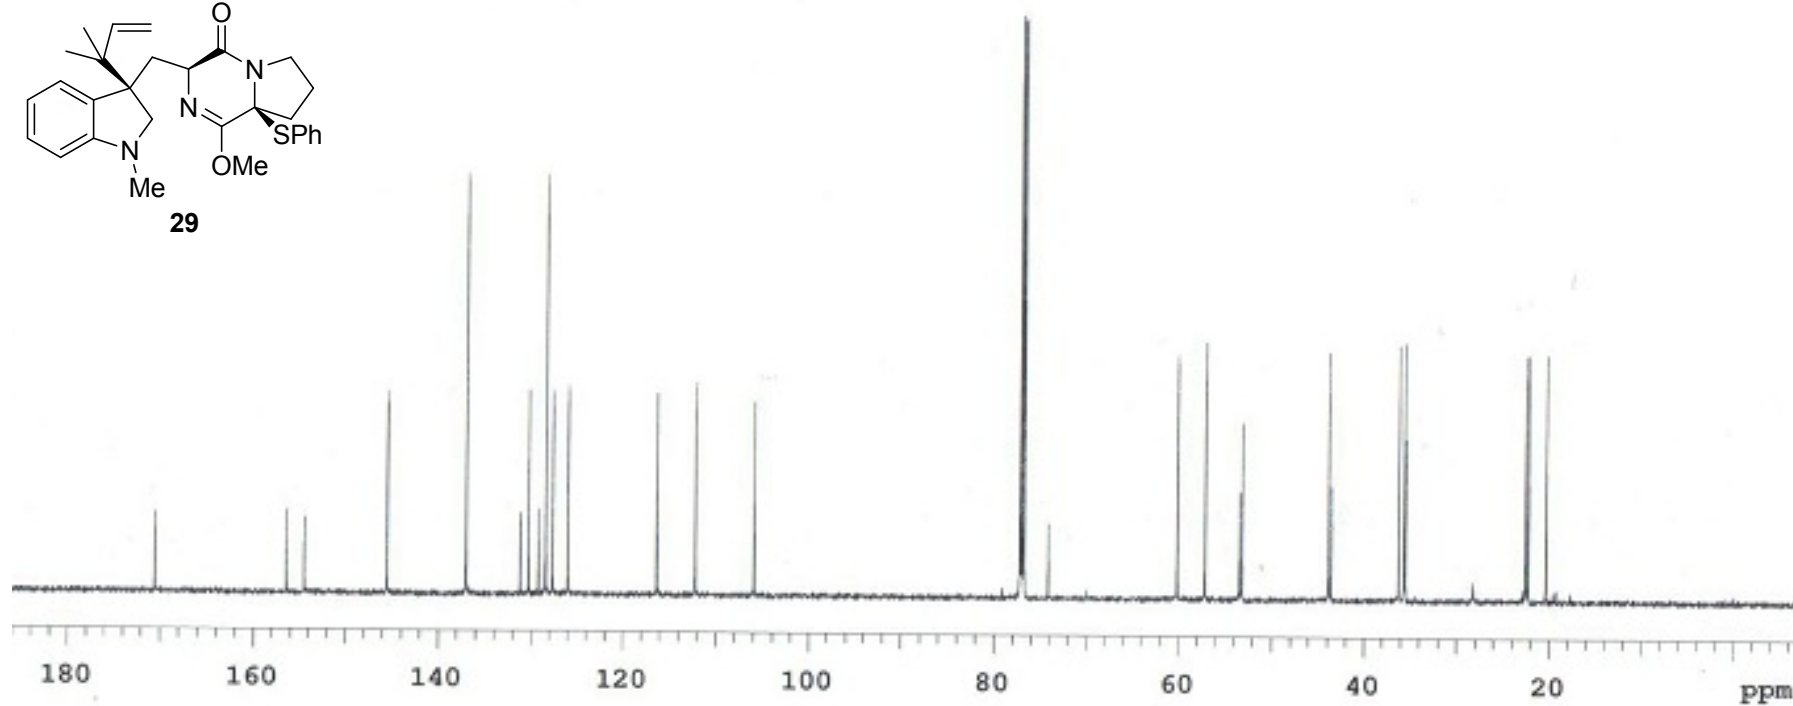

$^{13}\text{C}$  NMR spectrum of compound **29**

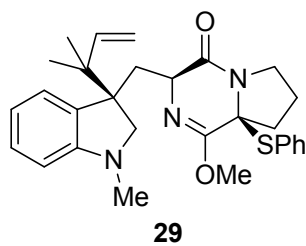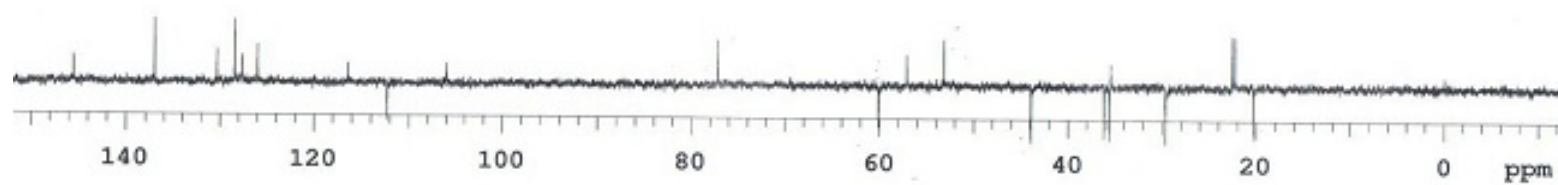

DEPT spectrum of compound **29**

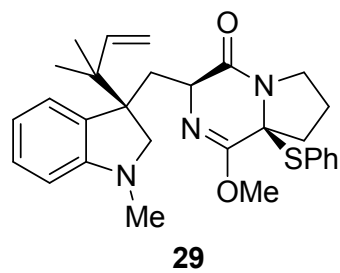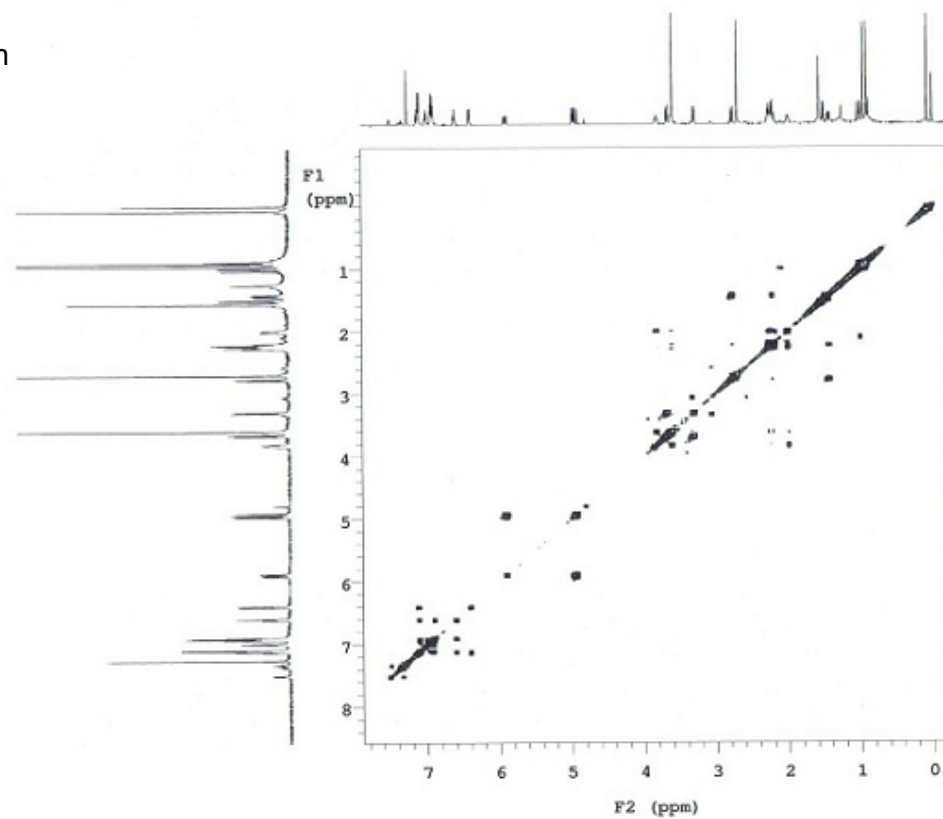

gCOSY spectrum of compound **29**

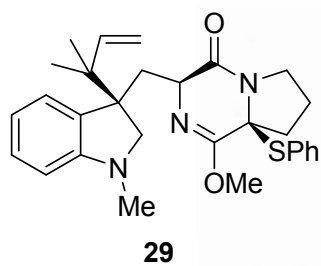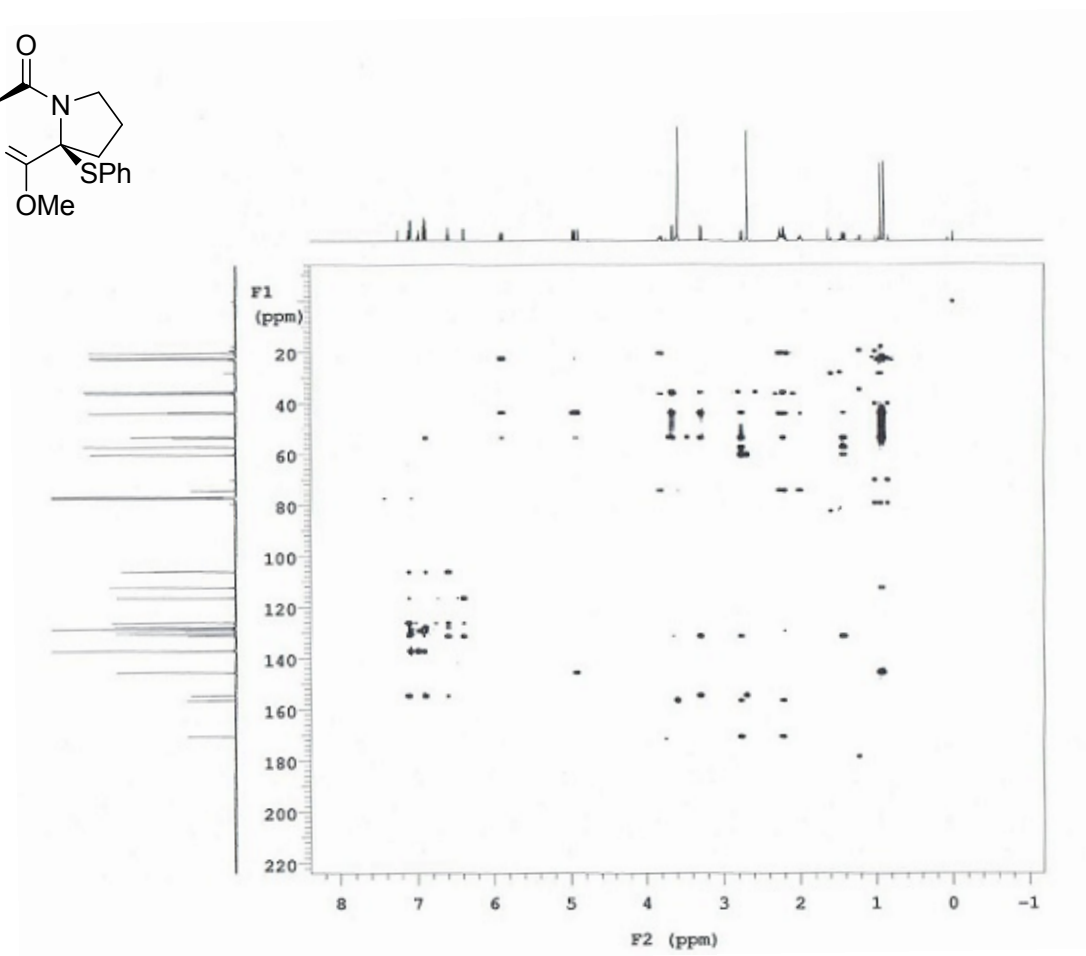

gHMBC spectrum of compound **29**

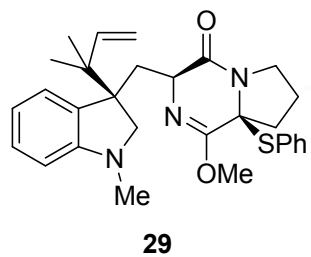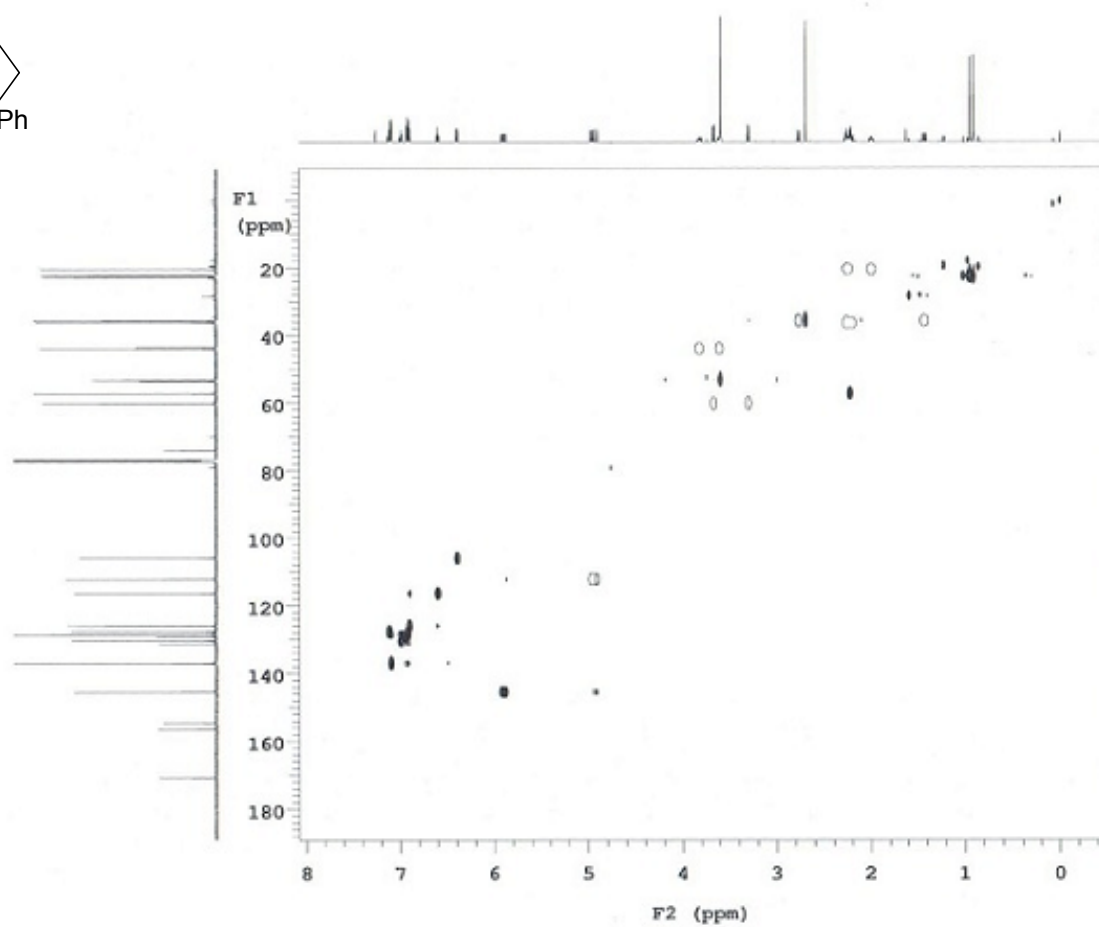

gHMQC spectrum of compound **29**

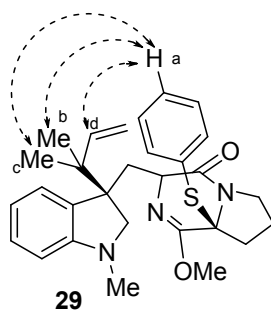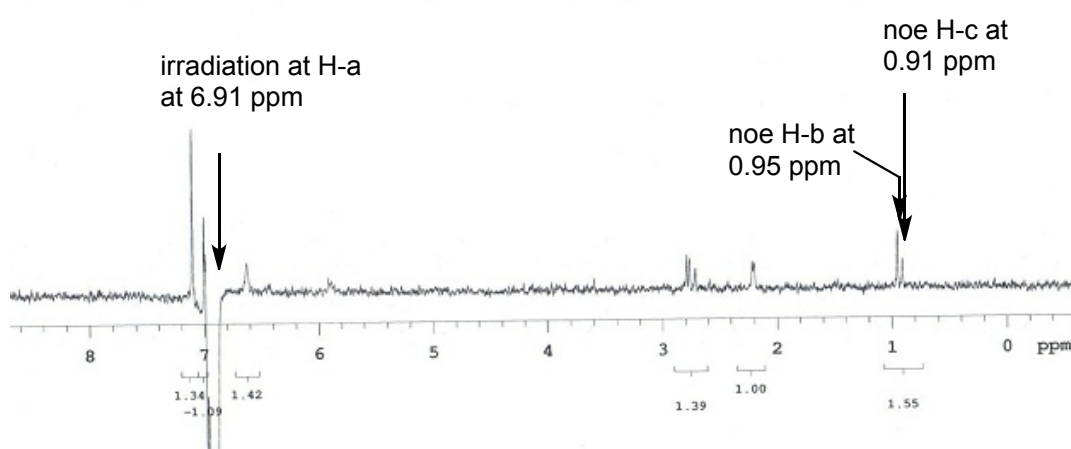

NOEDS spectrum of compound **29** (1)

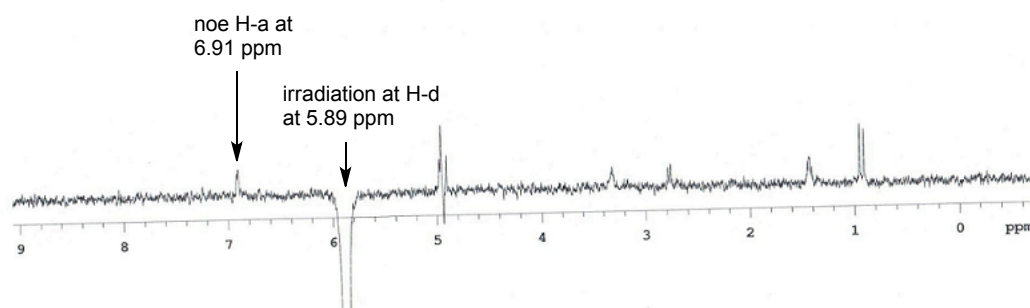

NOEDS spectrum of compound **29** (2)



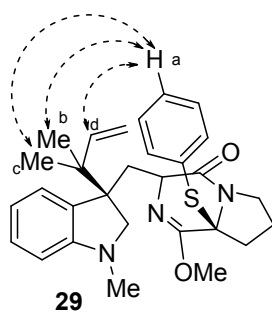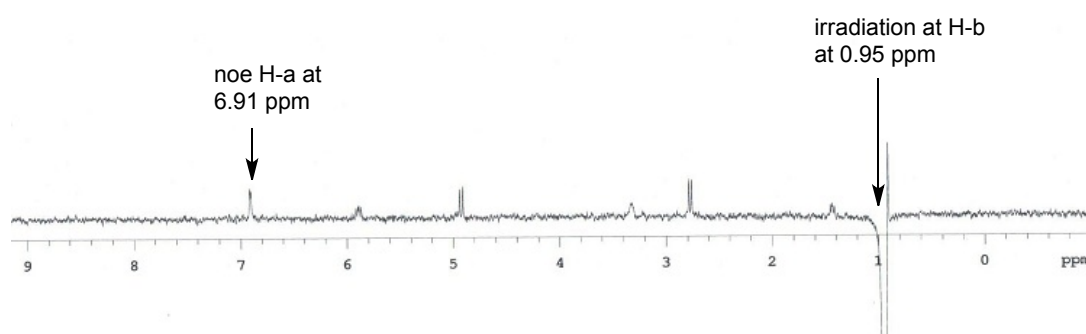

NOEDS spectrum of compound **29** (3)

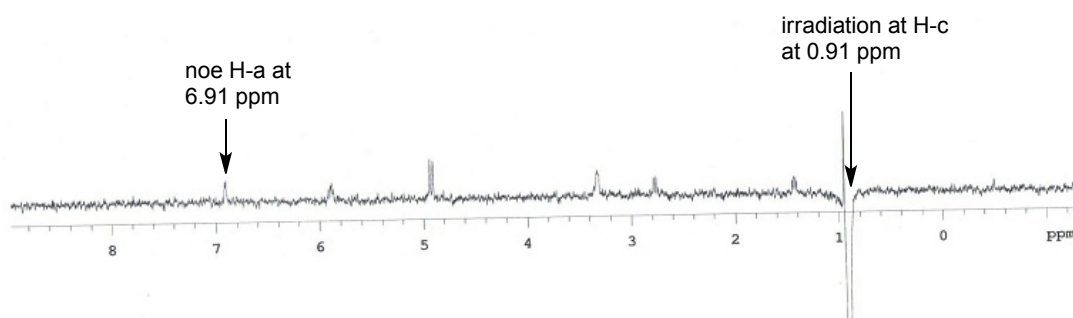

NOEDS spectrum of compound **29** (4)

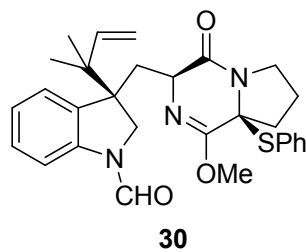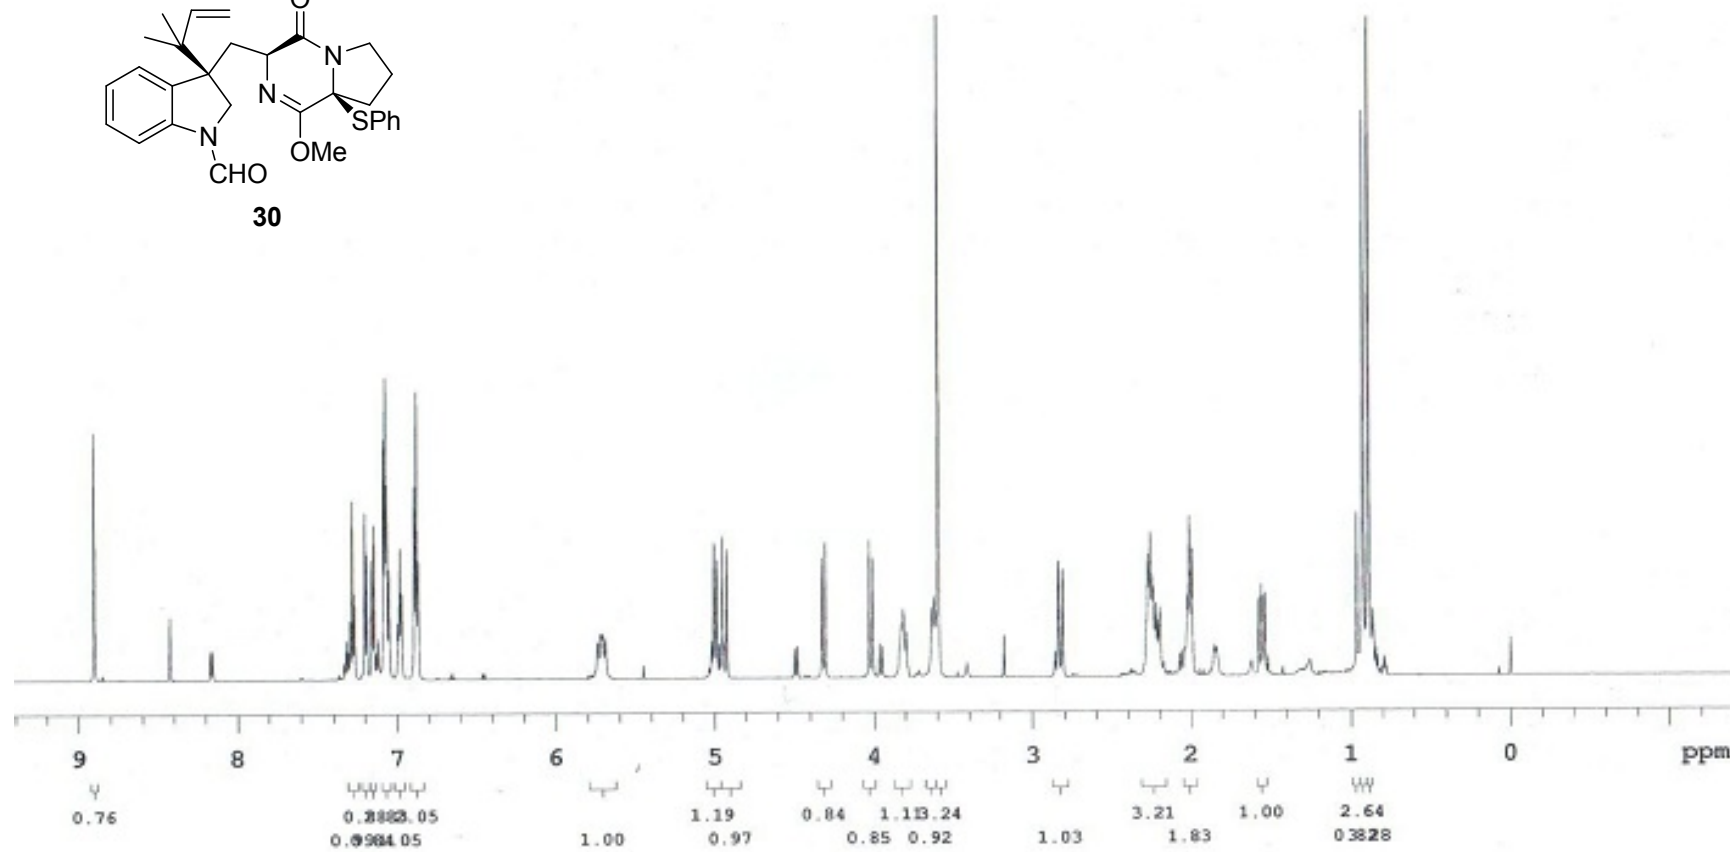

$^1\text{H}$  NMR spectrum of compound **30**

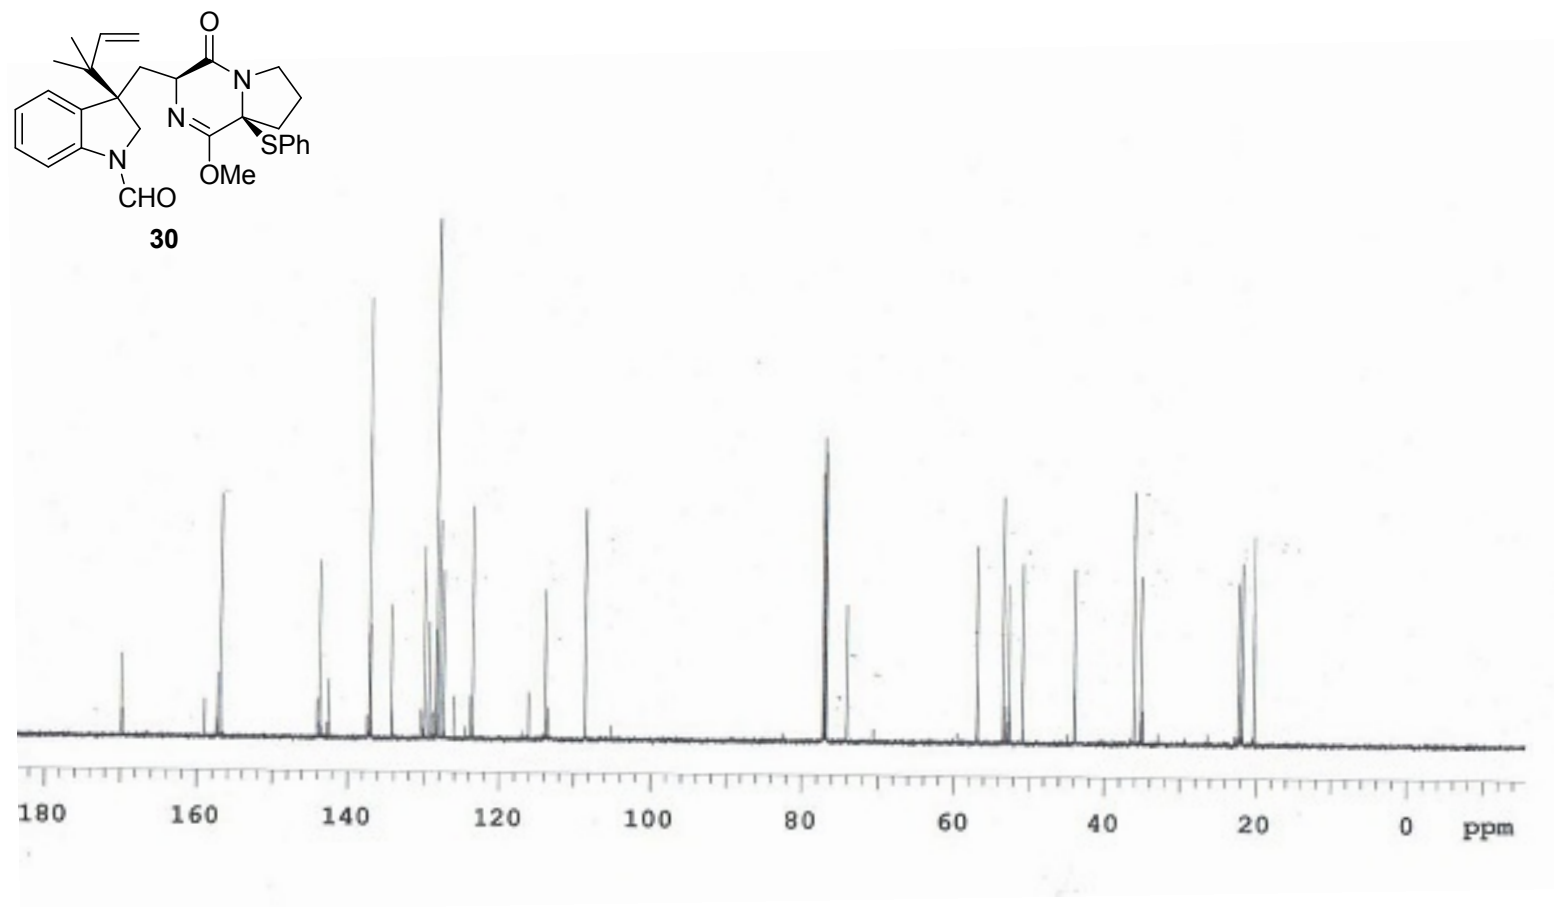

$^{13}\text{C}$  NMR spectrum of compound **30**

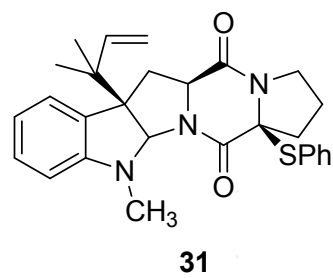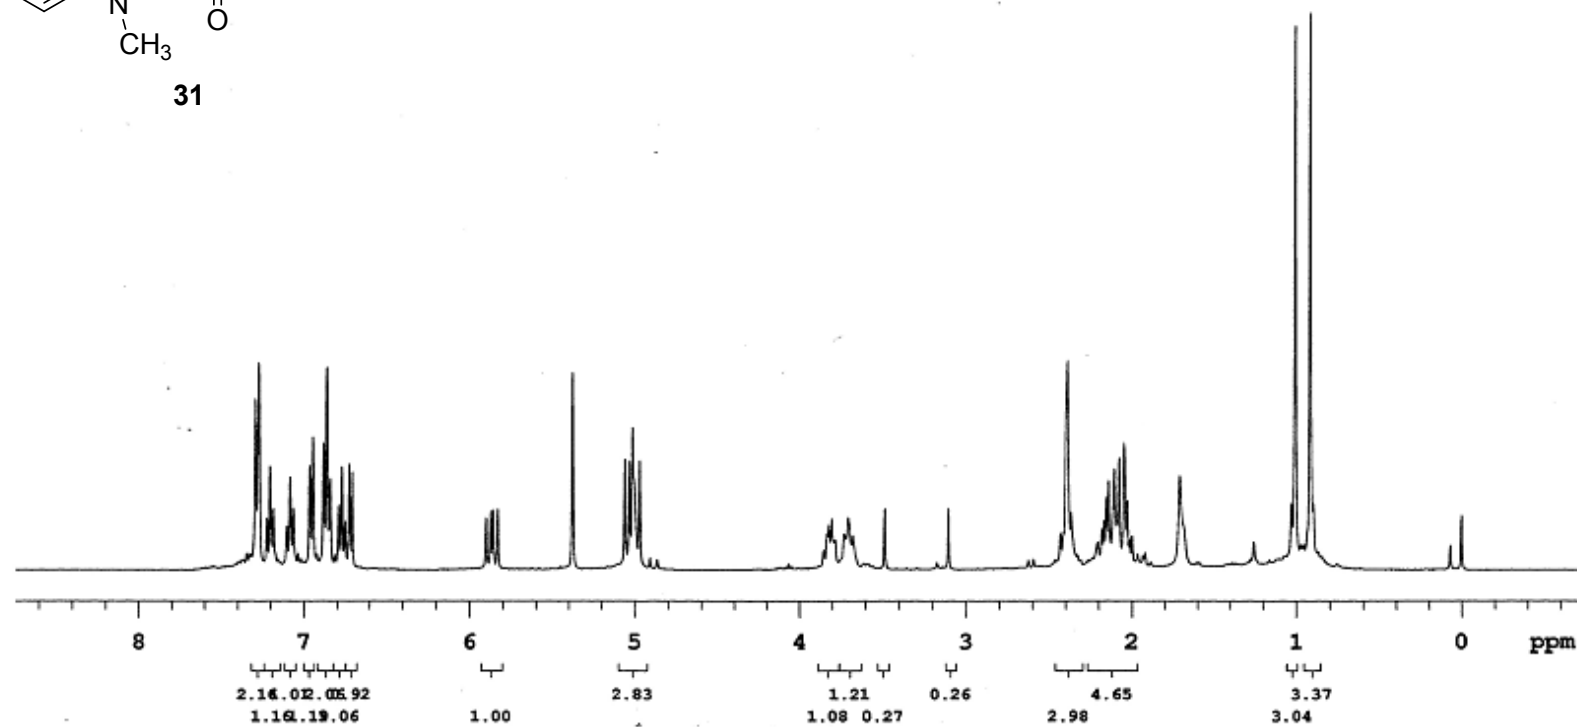

<sup>1</sup>H NMR spectrum of compound **31**

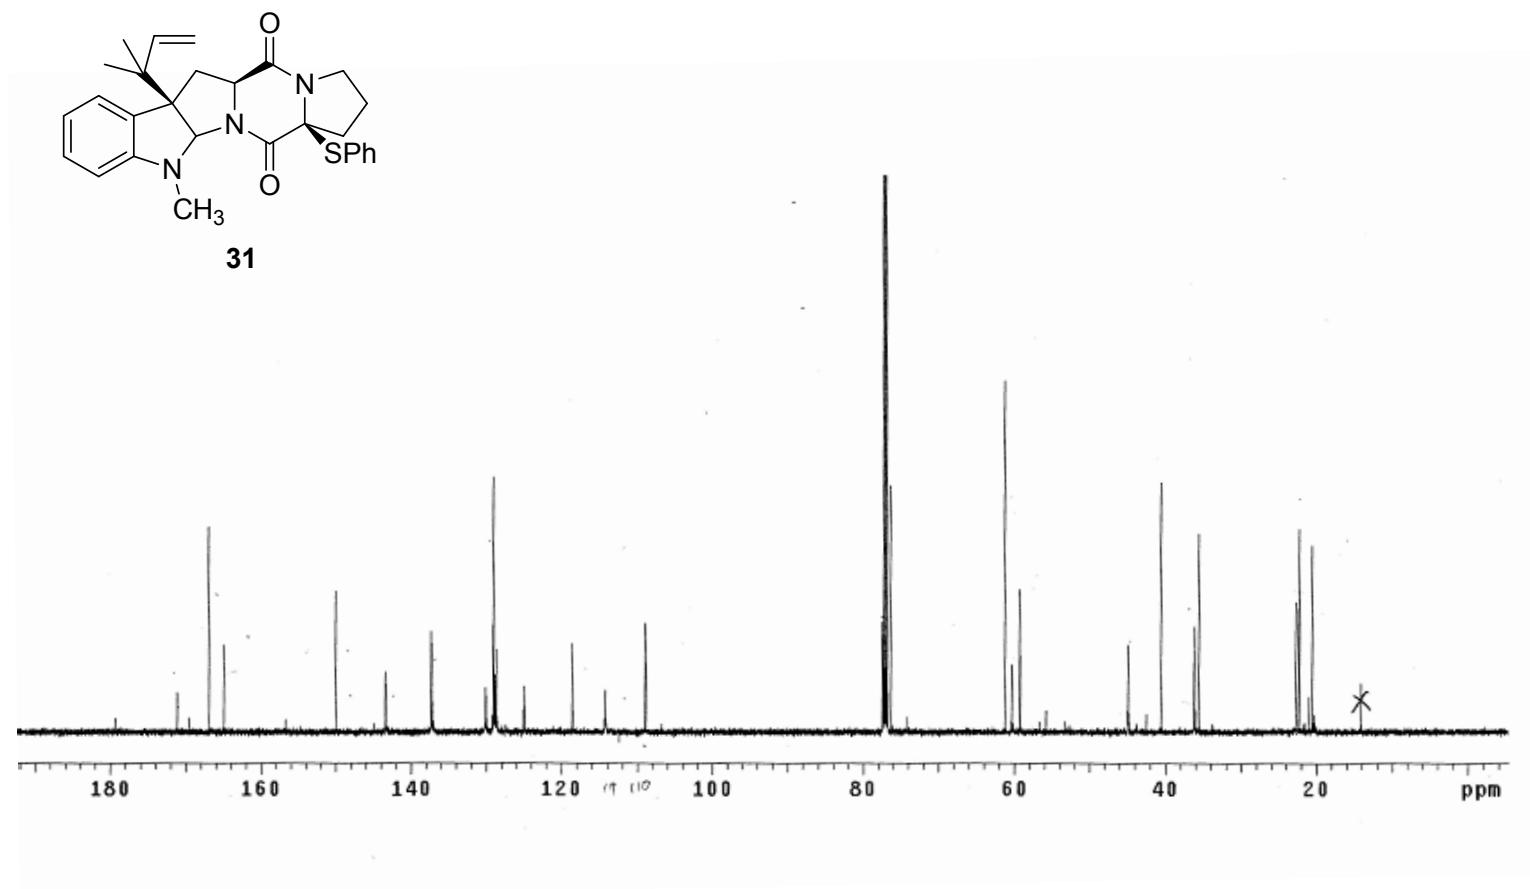

$^{13}\text{C}$  NMR spectrum of compound **31**

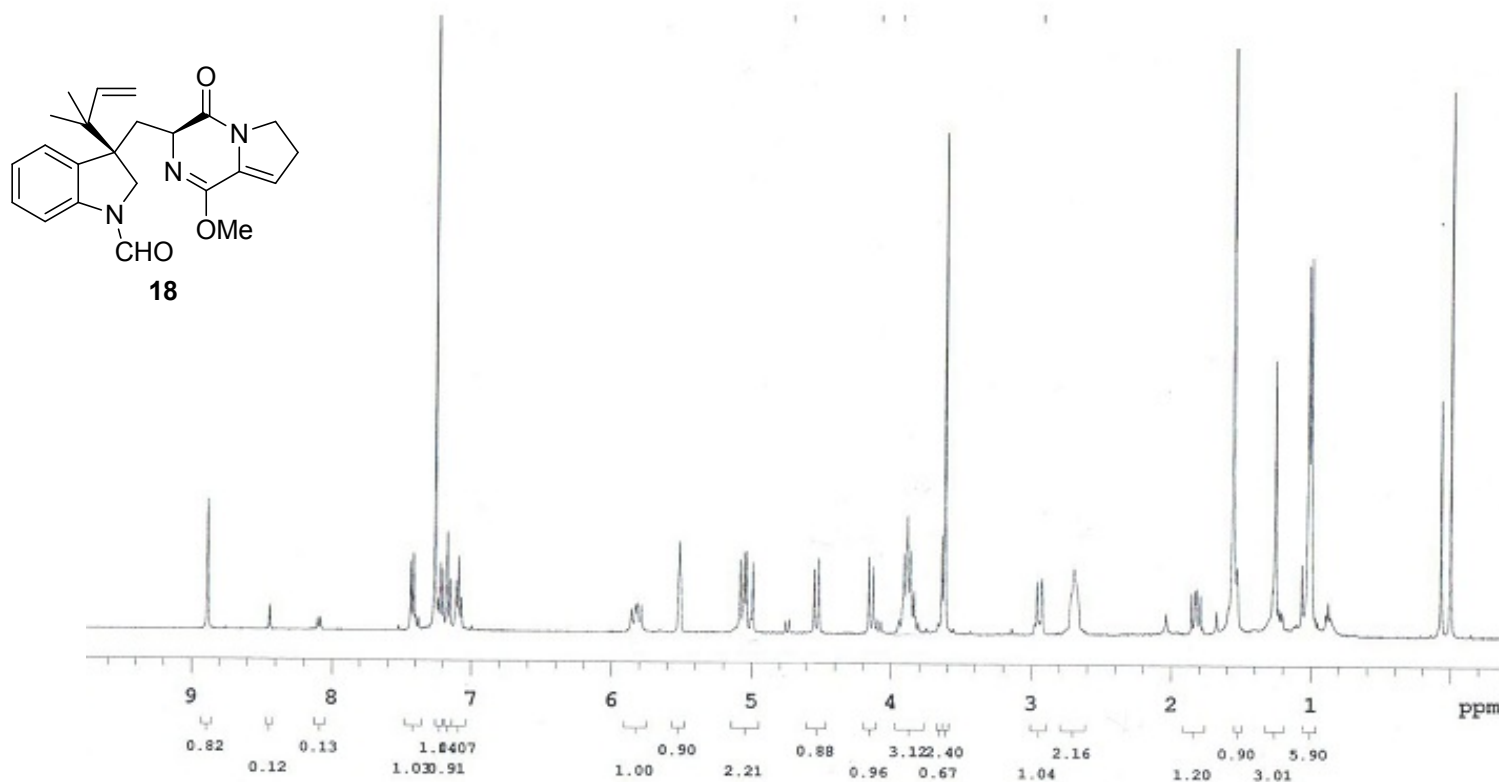

<sup>1</sup>H NMR spectrum of compound **18**

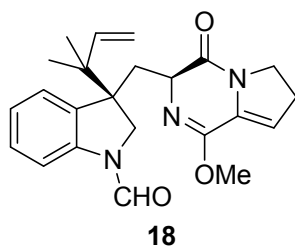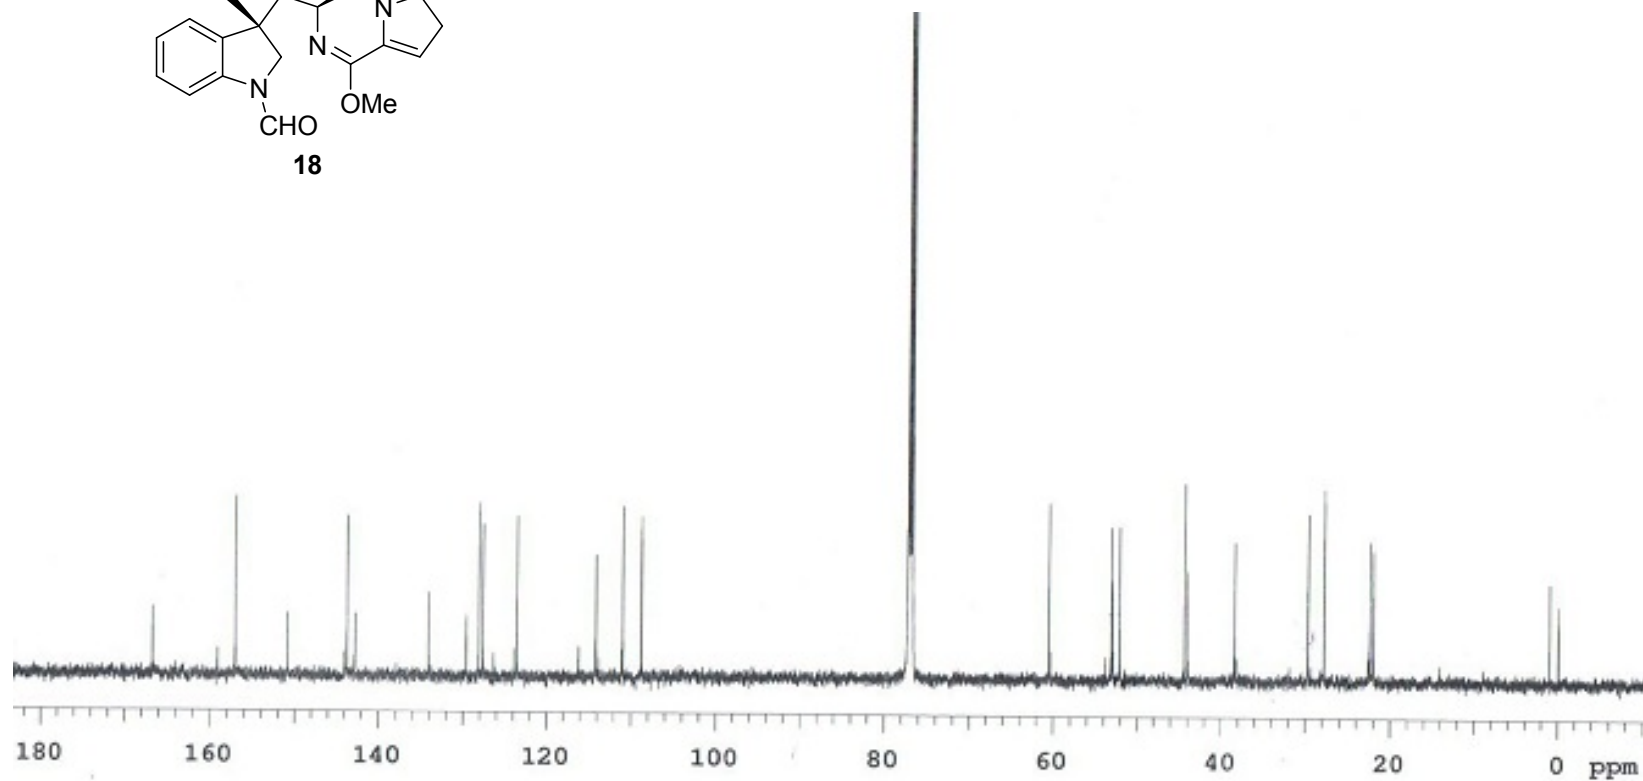

$^{13}\text{C}$  NMR spectrum of compound **18**

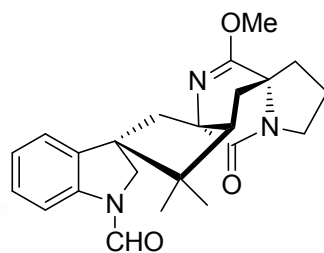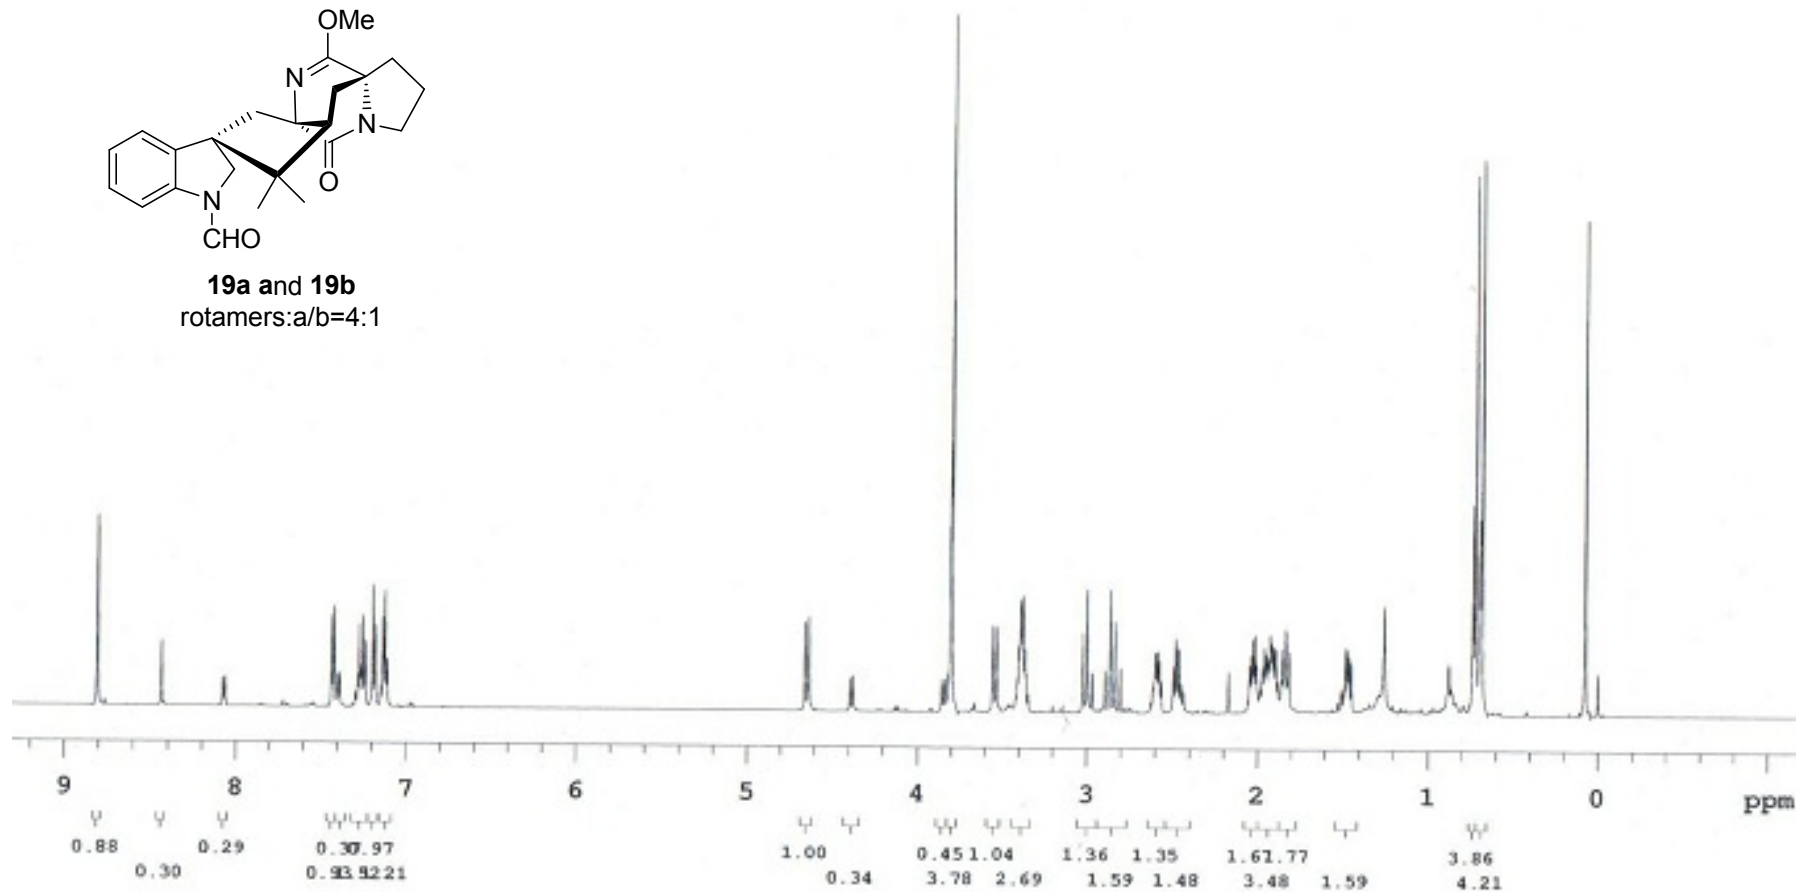

<sup>1</sup>H NMR spectrum of compound **19**



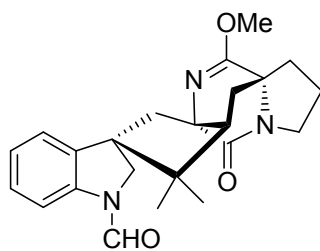

**19a and 19b**  
rotamers: a/b=4:1

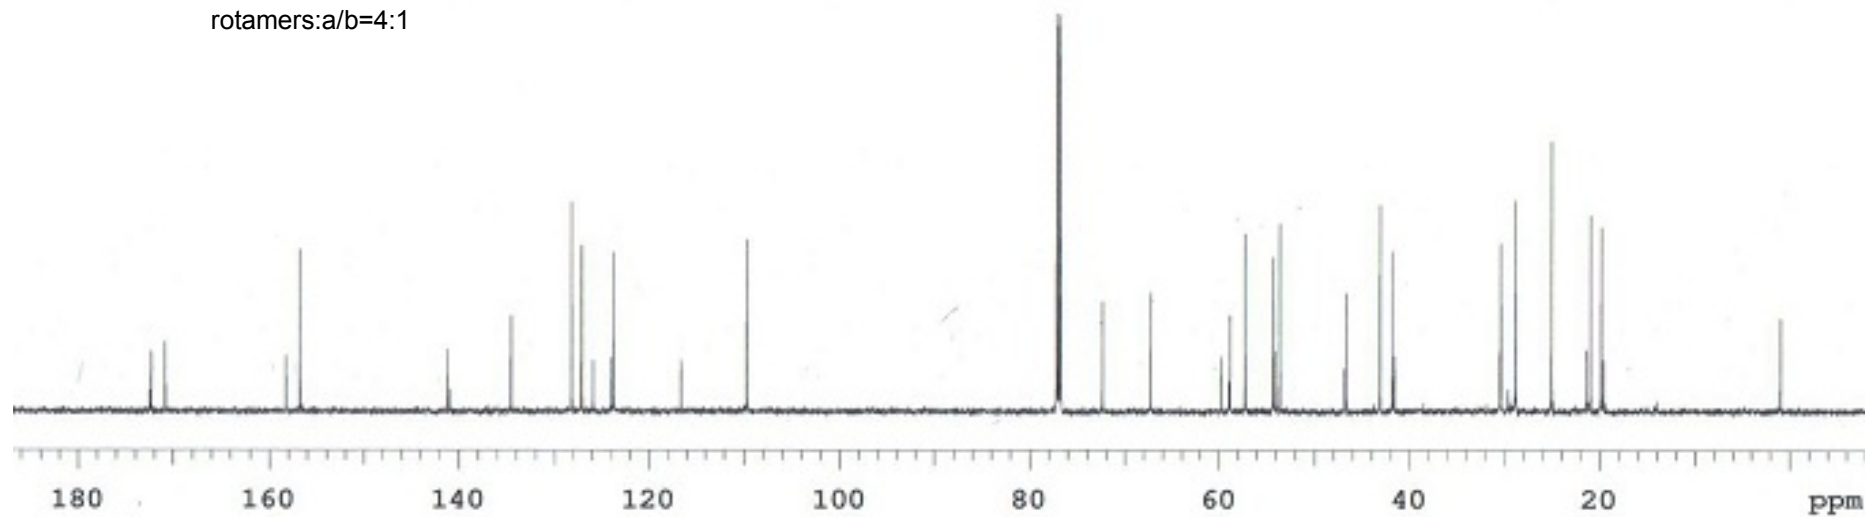

$^{13}\text{C}$  NMR spectrum of compound **19**

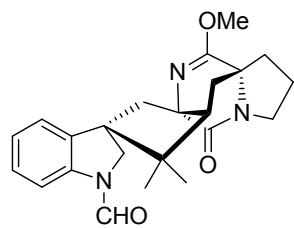

**19a and 19b**  
rotamers: a/b=4:1

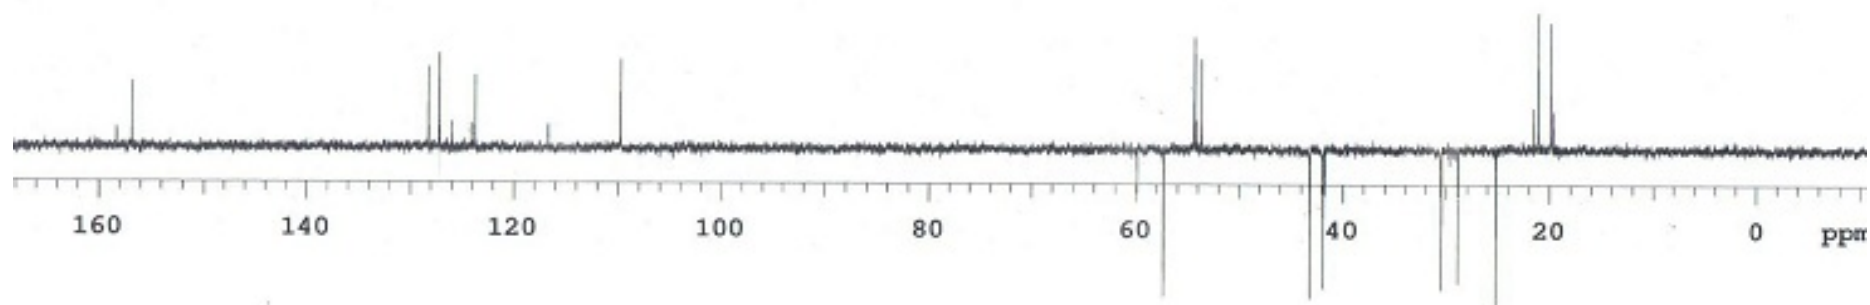

DEPT spectrum of compound **19**

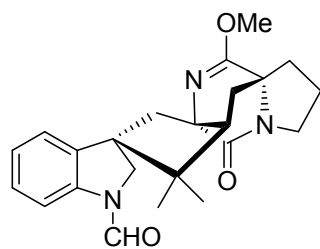

**19a and 19b**  
rotamers: a/b=4:1

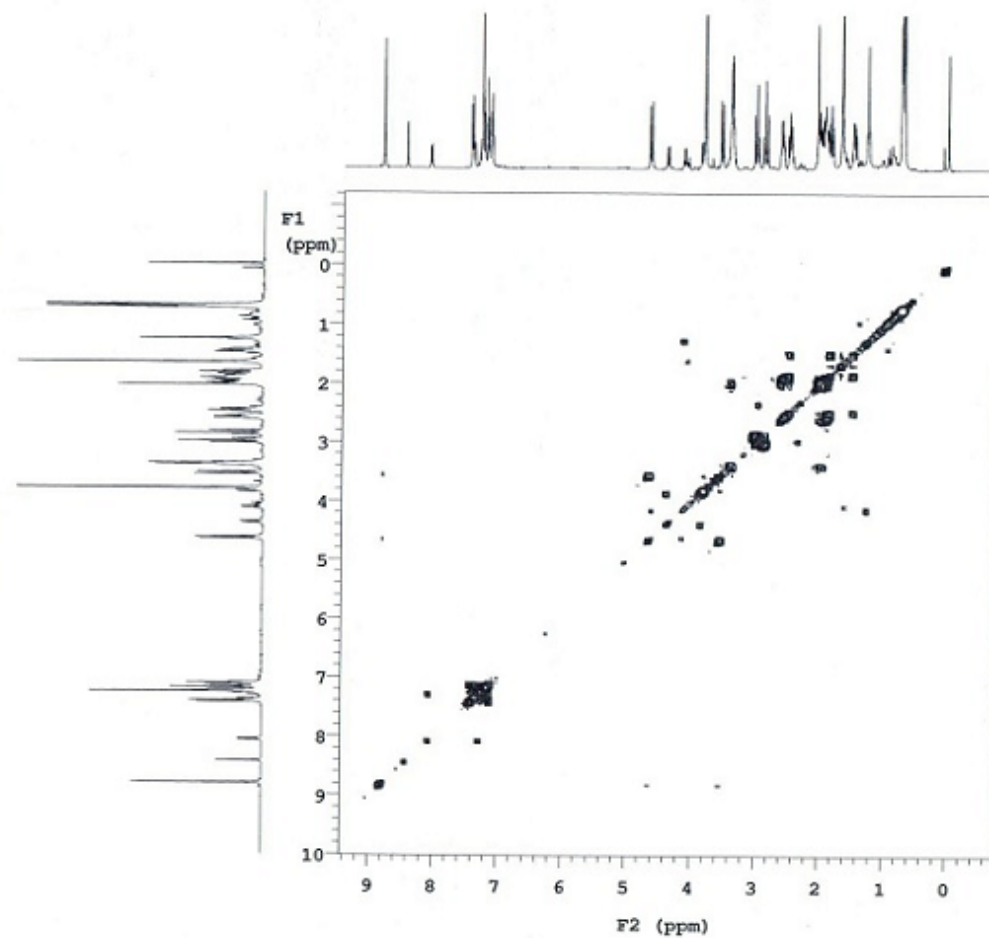

gCOSY spectrum of compound **19**

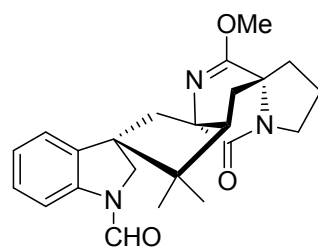

**19a and 19b**  
rotamers:a/b=4:1

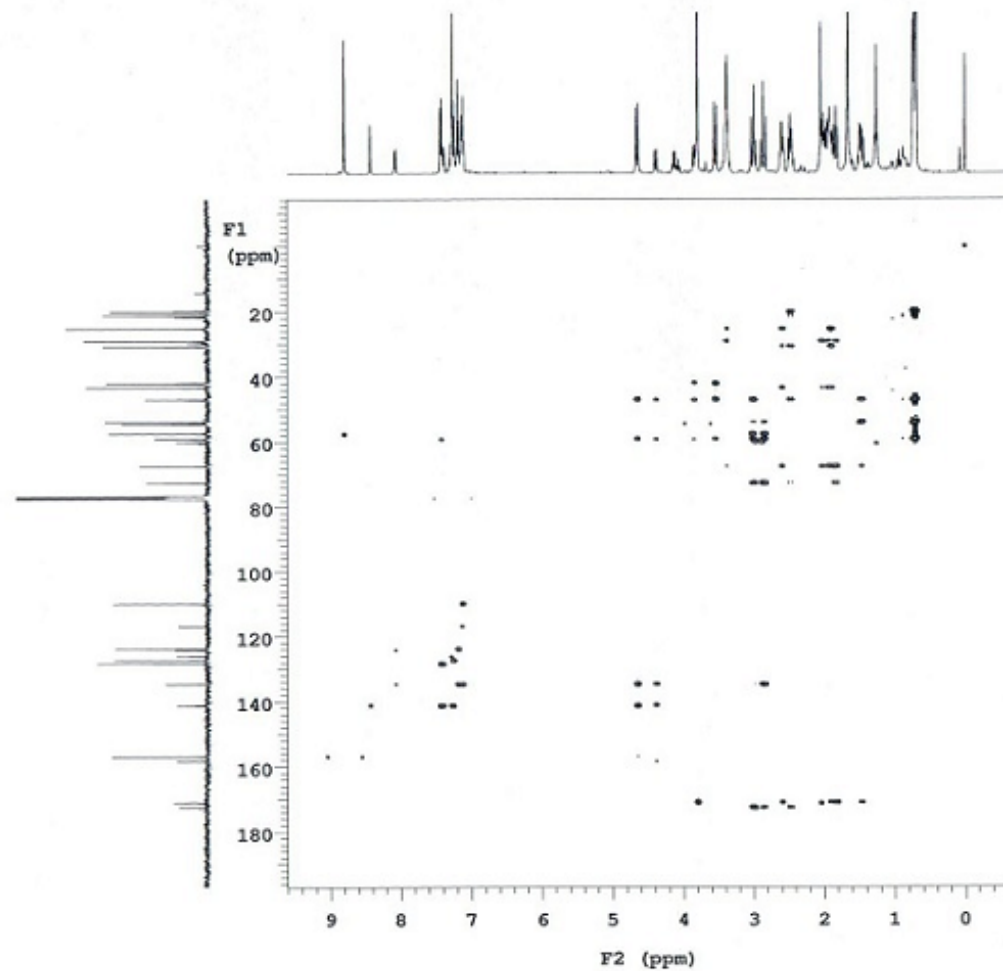

gHMBC spectrum of compound **19**

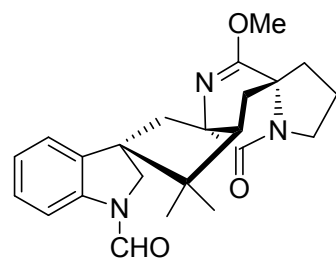

**19a and 19b**  
rotamers:a/b=4:1

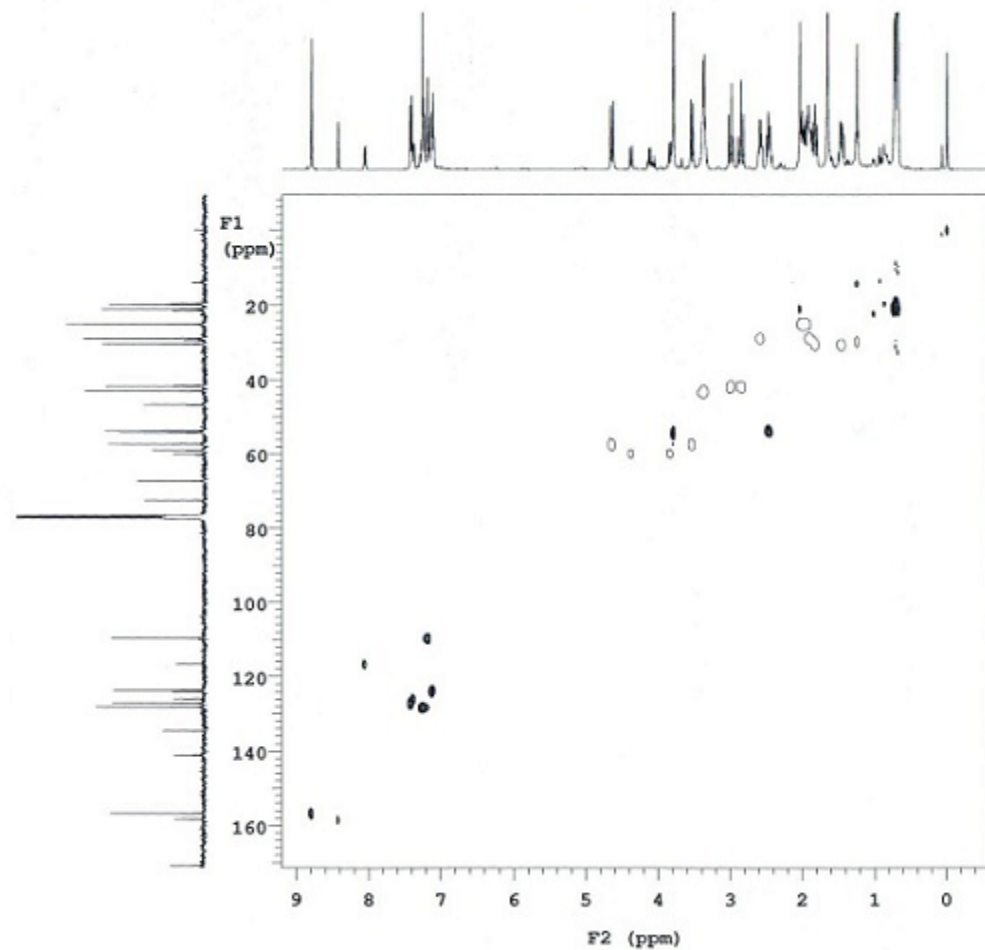

gHMQC spectrum of compound **19**

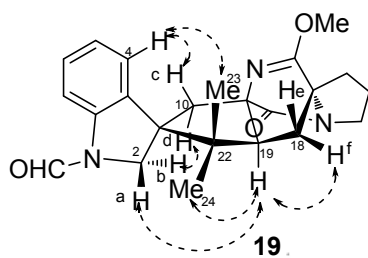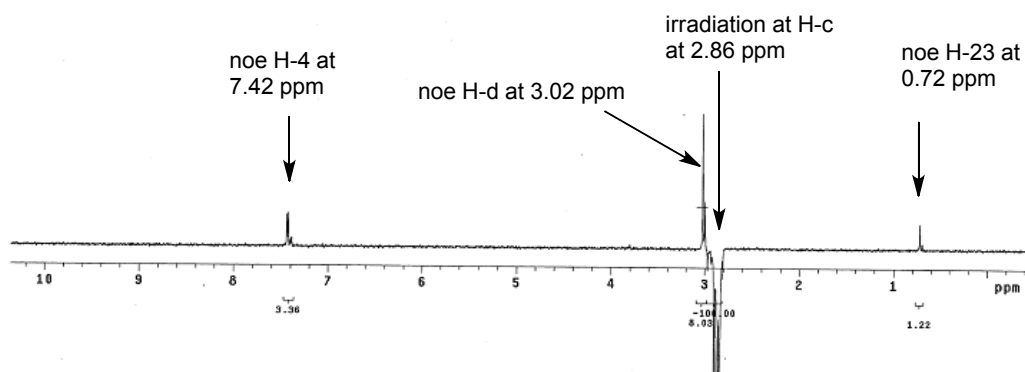

NOEDS spectrum of compound **19** (1)

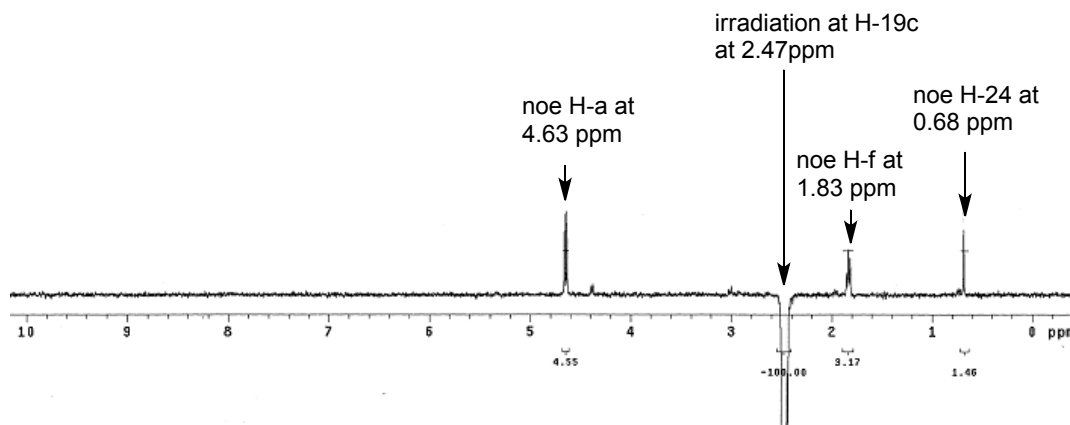

NOEDS spectrum of compound **19** (2)

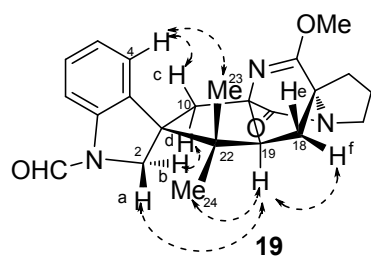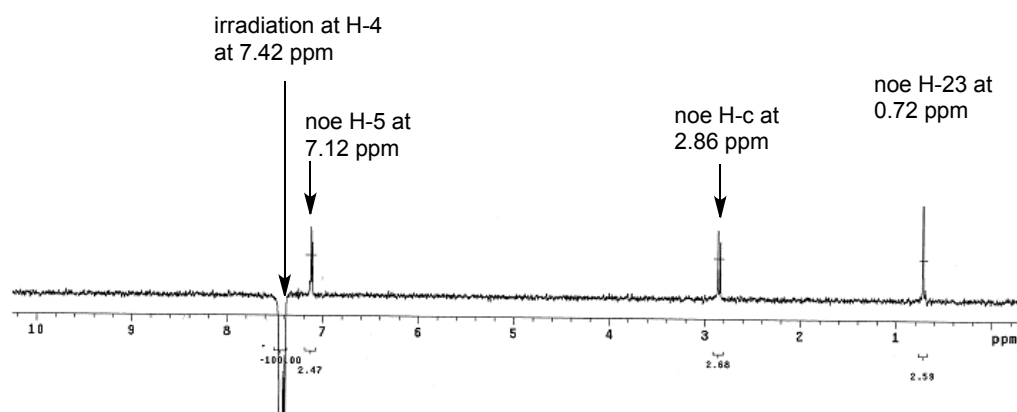

NOEDS spectrum of compound **19 (3)**

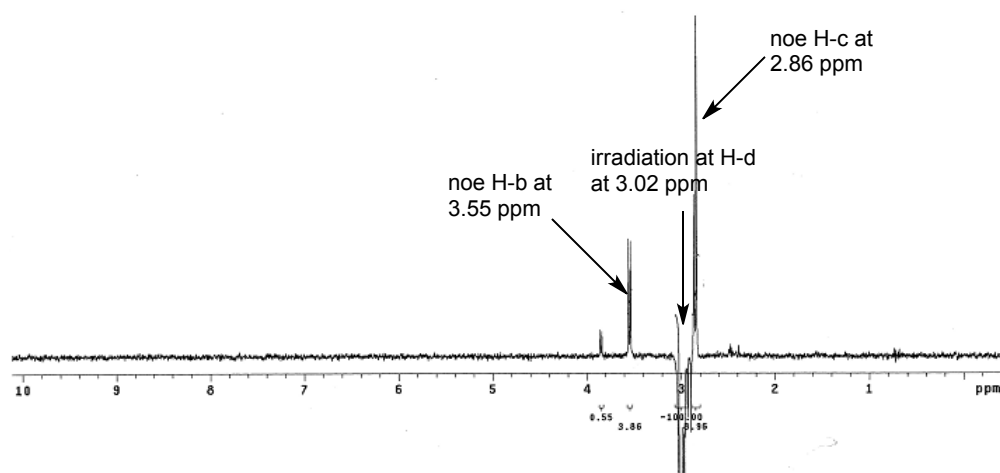

NOEDS spectrum of compound **19 (4)**

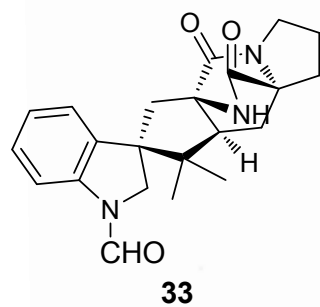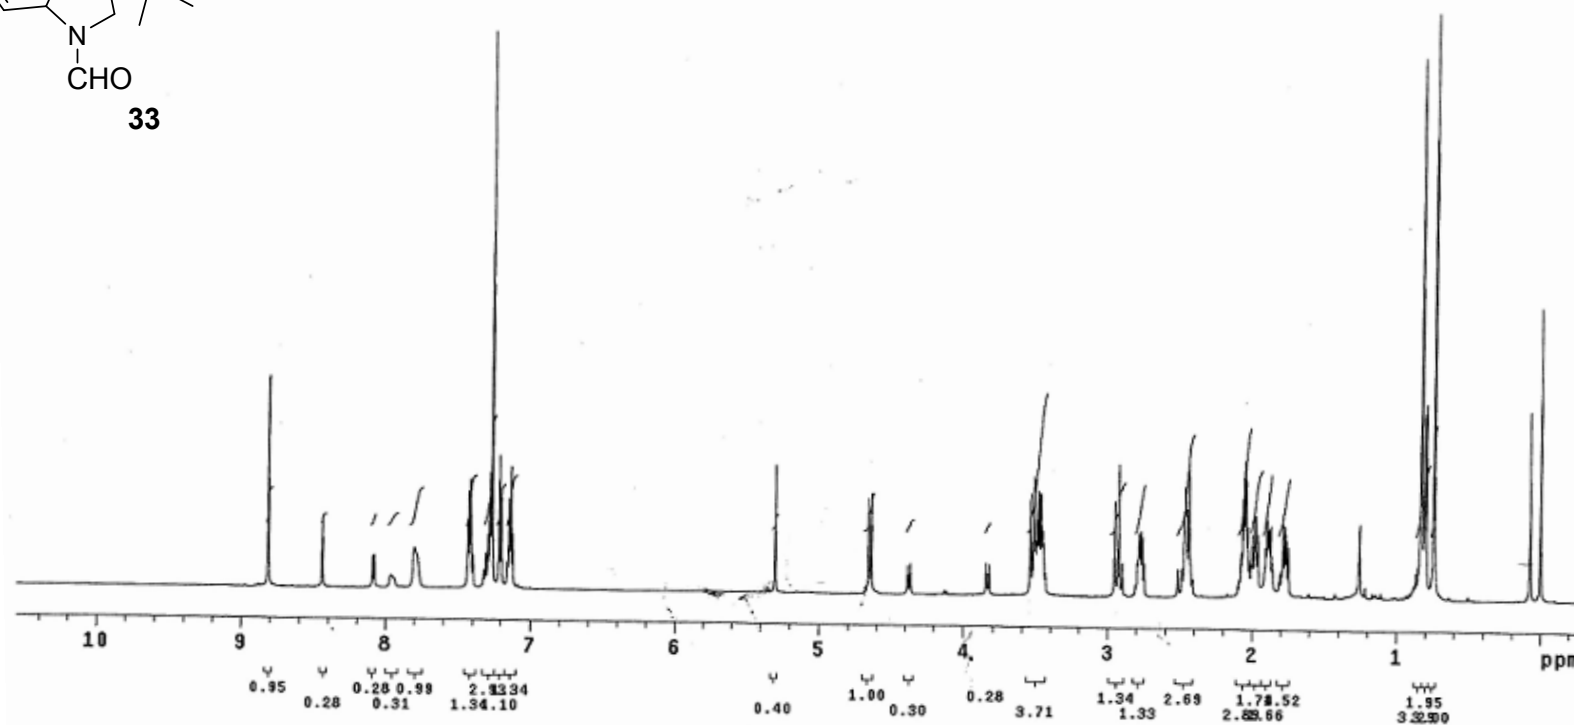

$^1\text{H}$  NMR spectrum of compound **33**



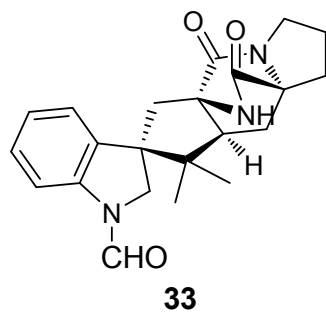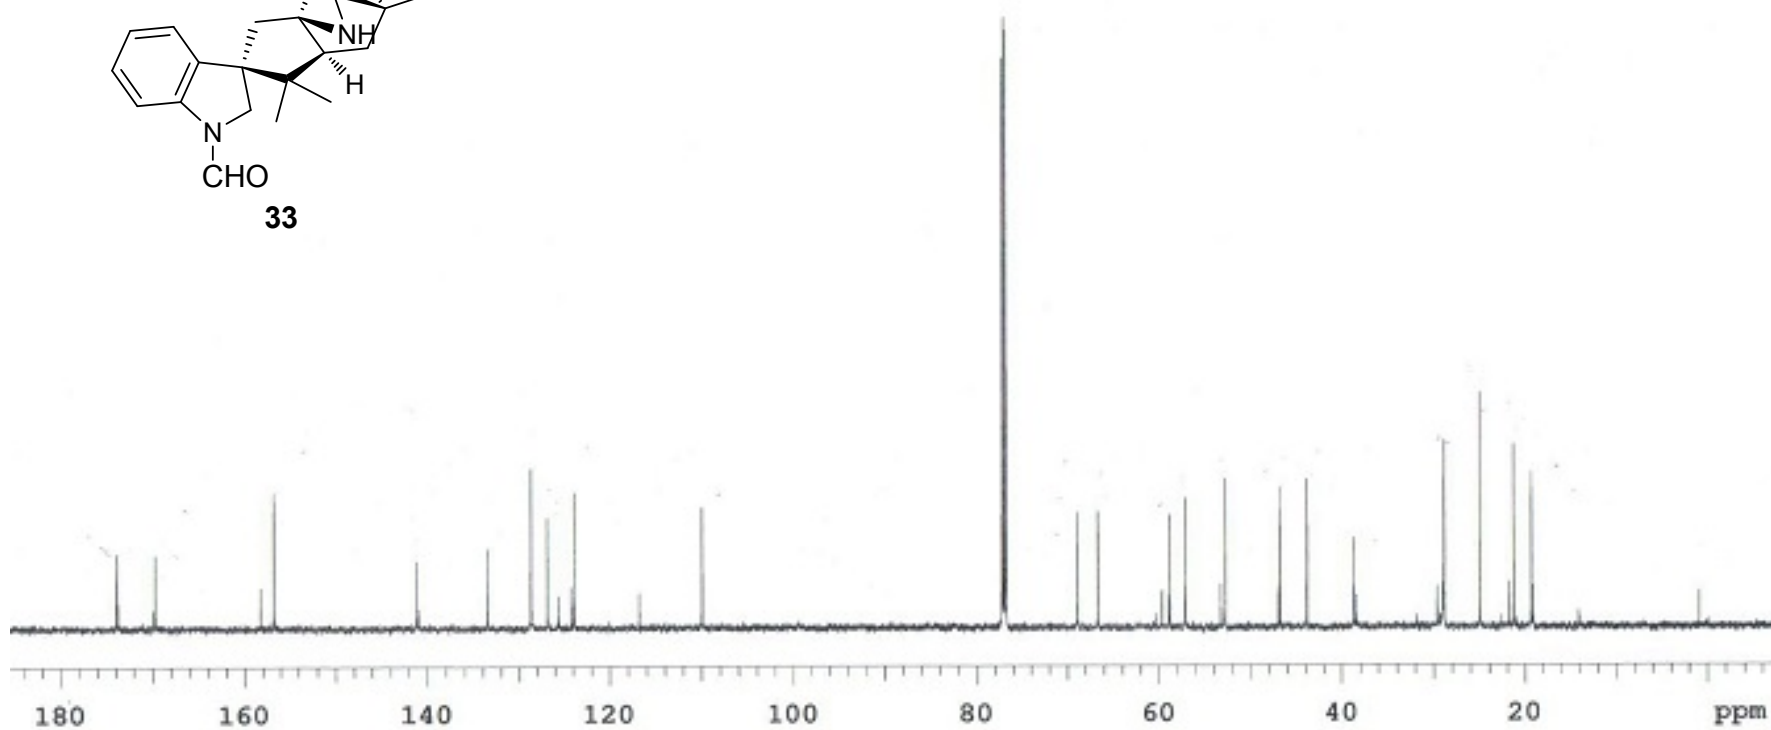

$^{13}\text{C}$  NMR spectrum of compound **33**

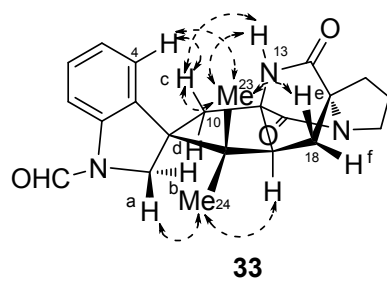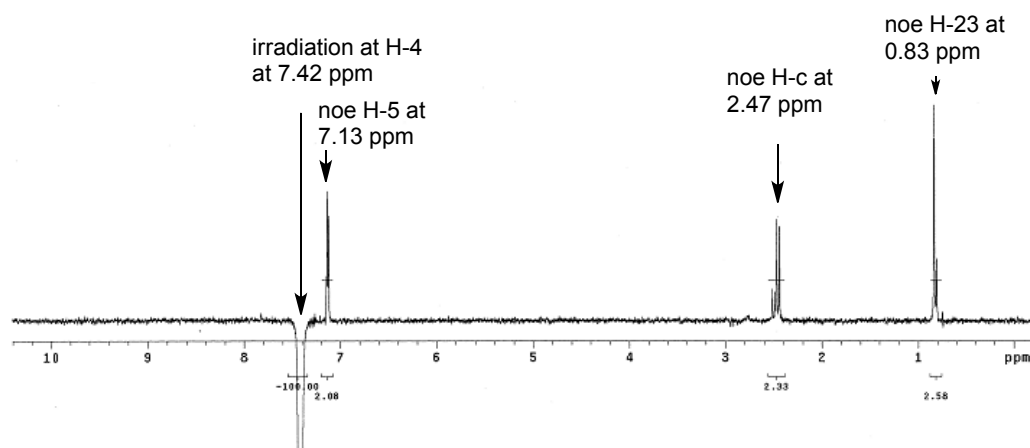

NOEDS spectrum of compound **33 (1)**

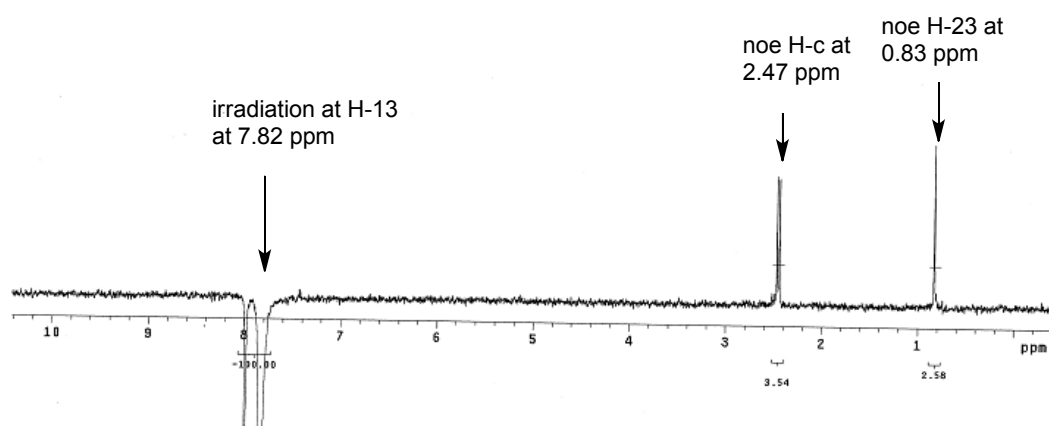

NOEDS spectrum of compound **33 (2)**

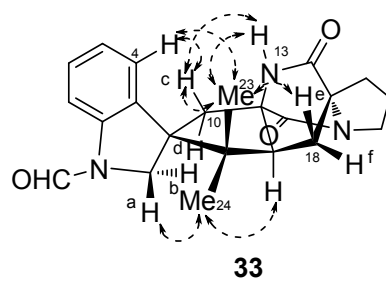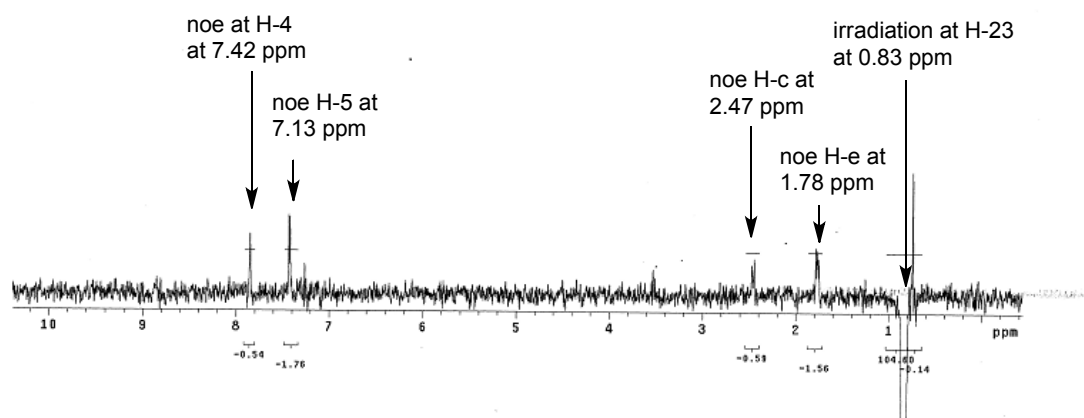

NOEDS spectrum of compound **33 (3)**

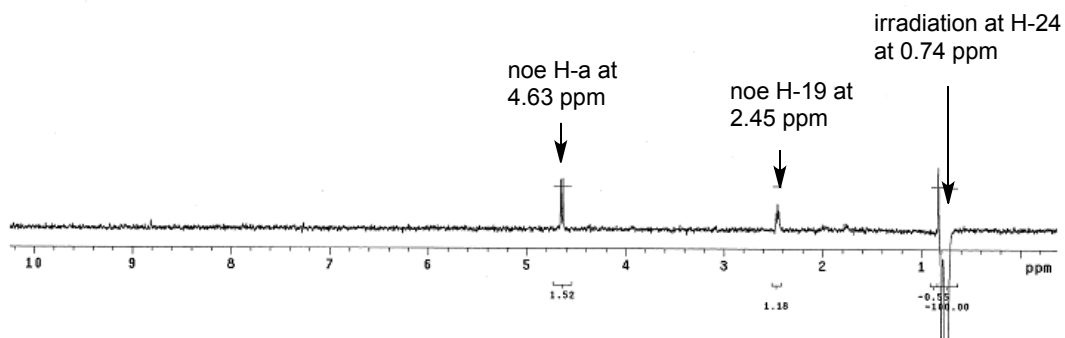

NOEDS spectrum of compound **33 (4)**

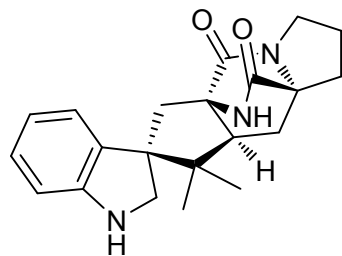

**34**

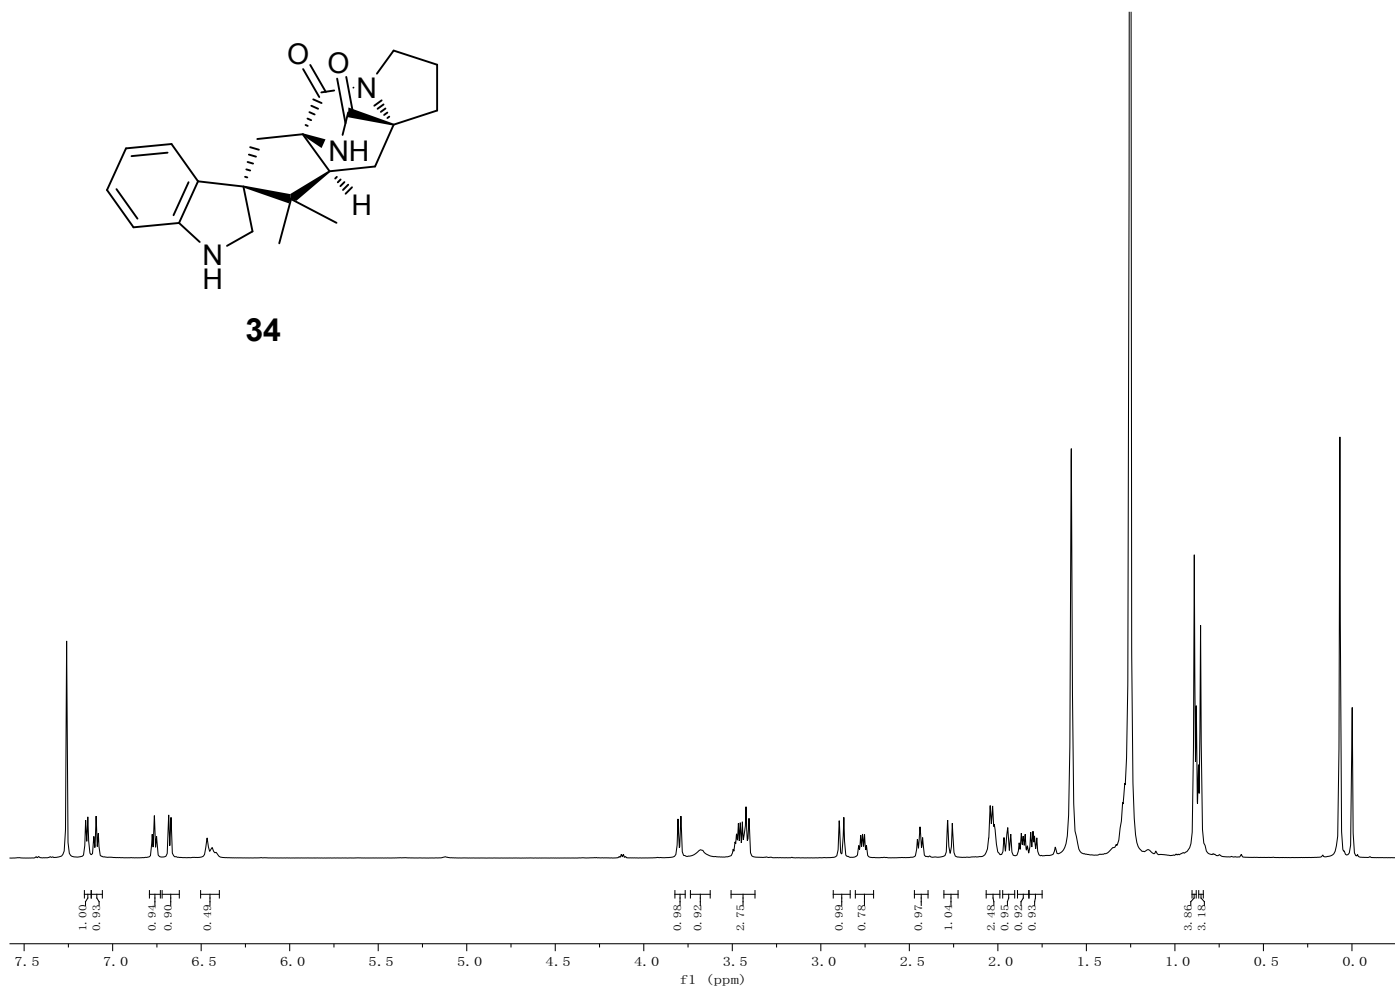

$^1\text{H}$  NMR spectrum of compound **34**

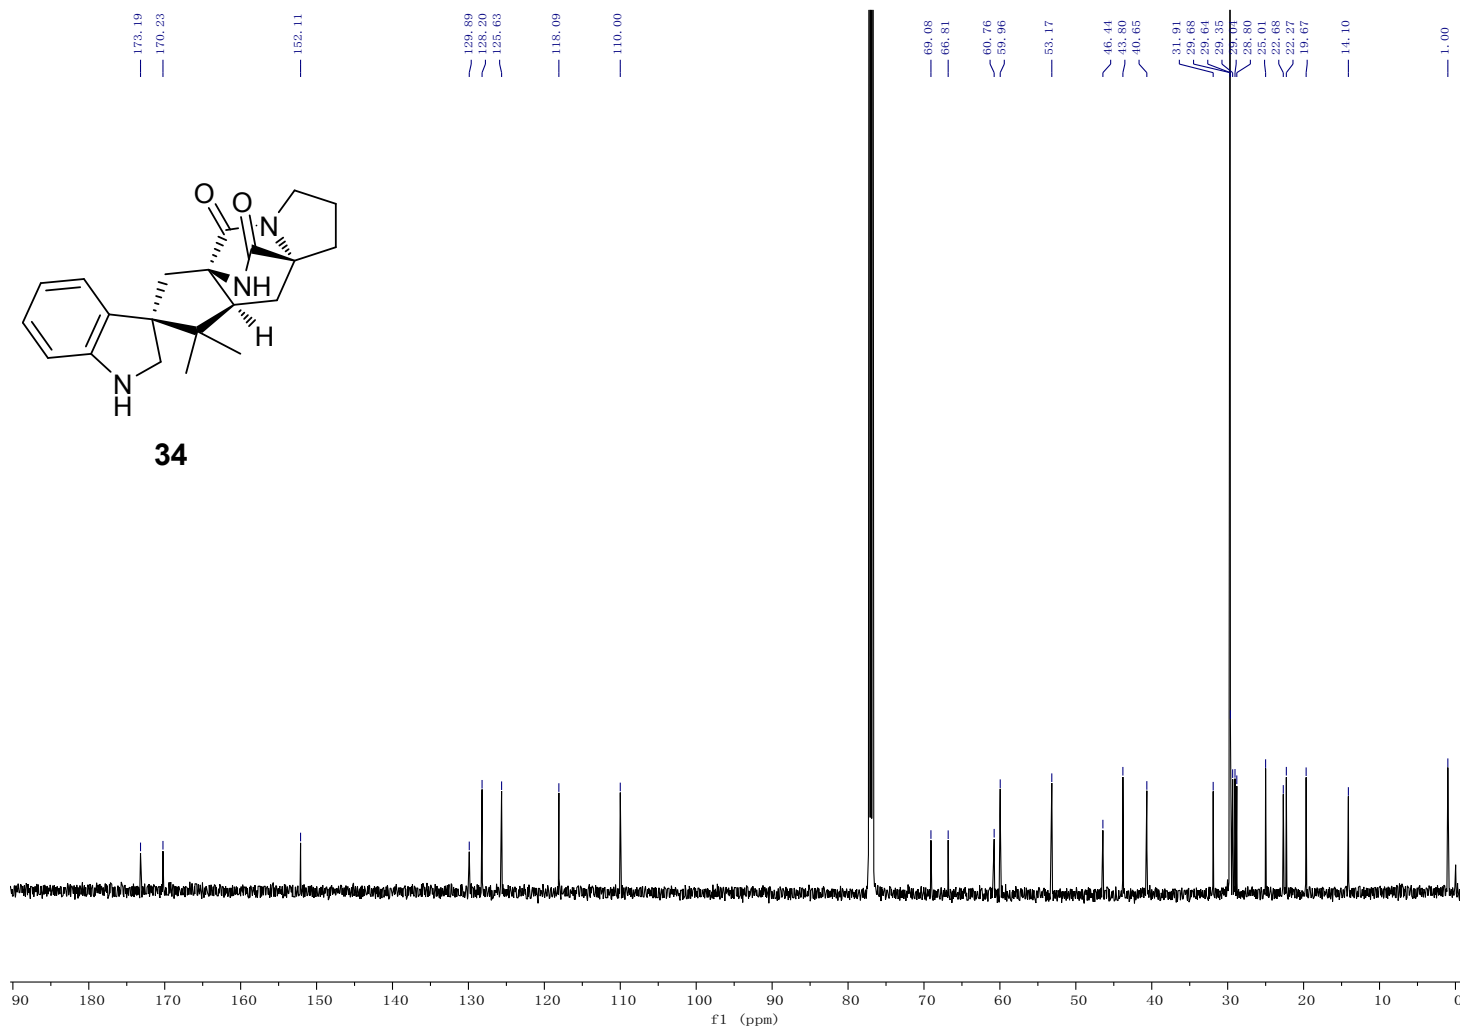

$^{13}\text{C}$  NMR spectrum of compound **34**

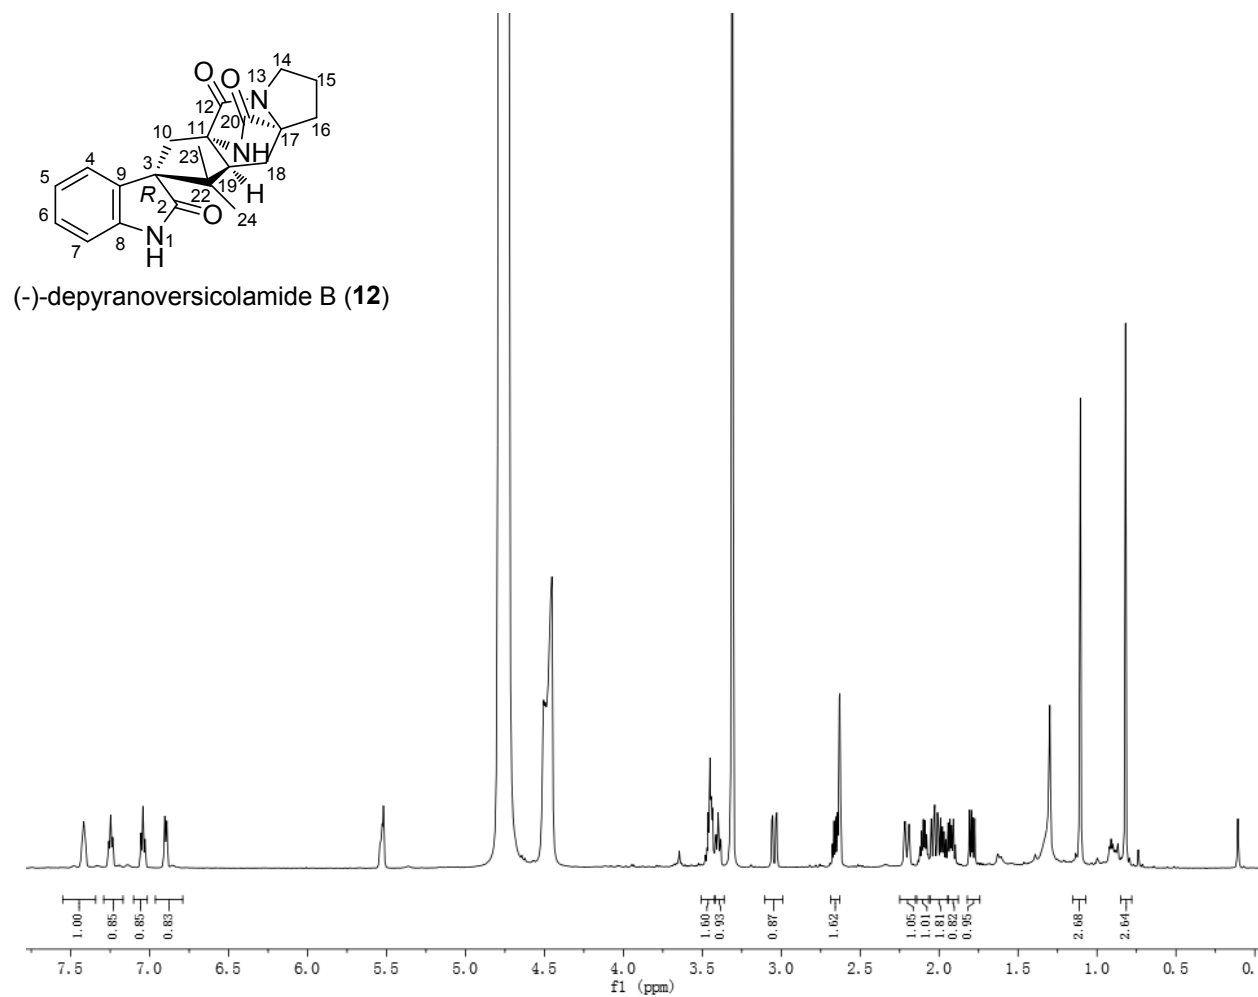

<sup>1</sup>H NMR spectrum of (-)-depyranoversicolamide B (12)

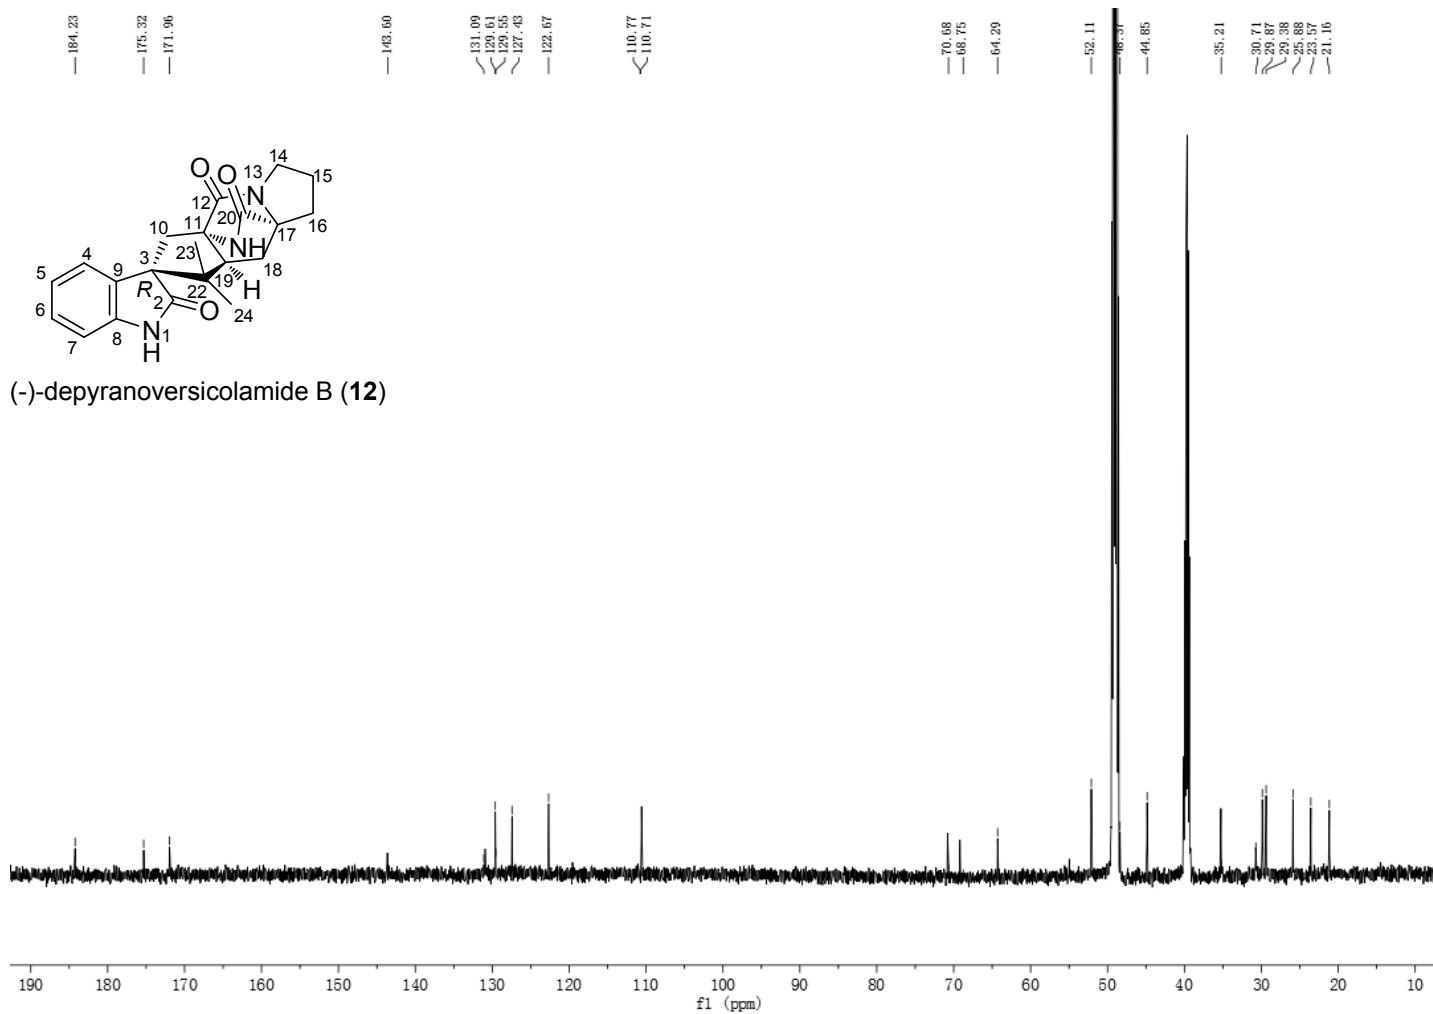

$^{13}\text{C}$  NMR spectrum of (-)-depyranoversicolamide B (12)

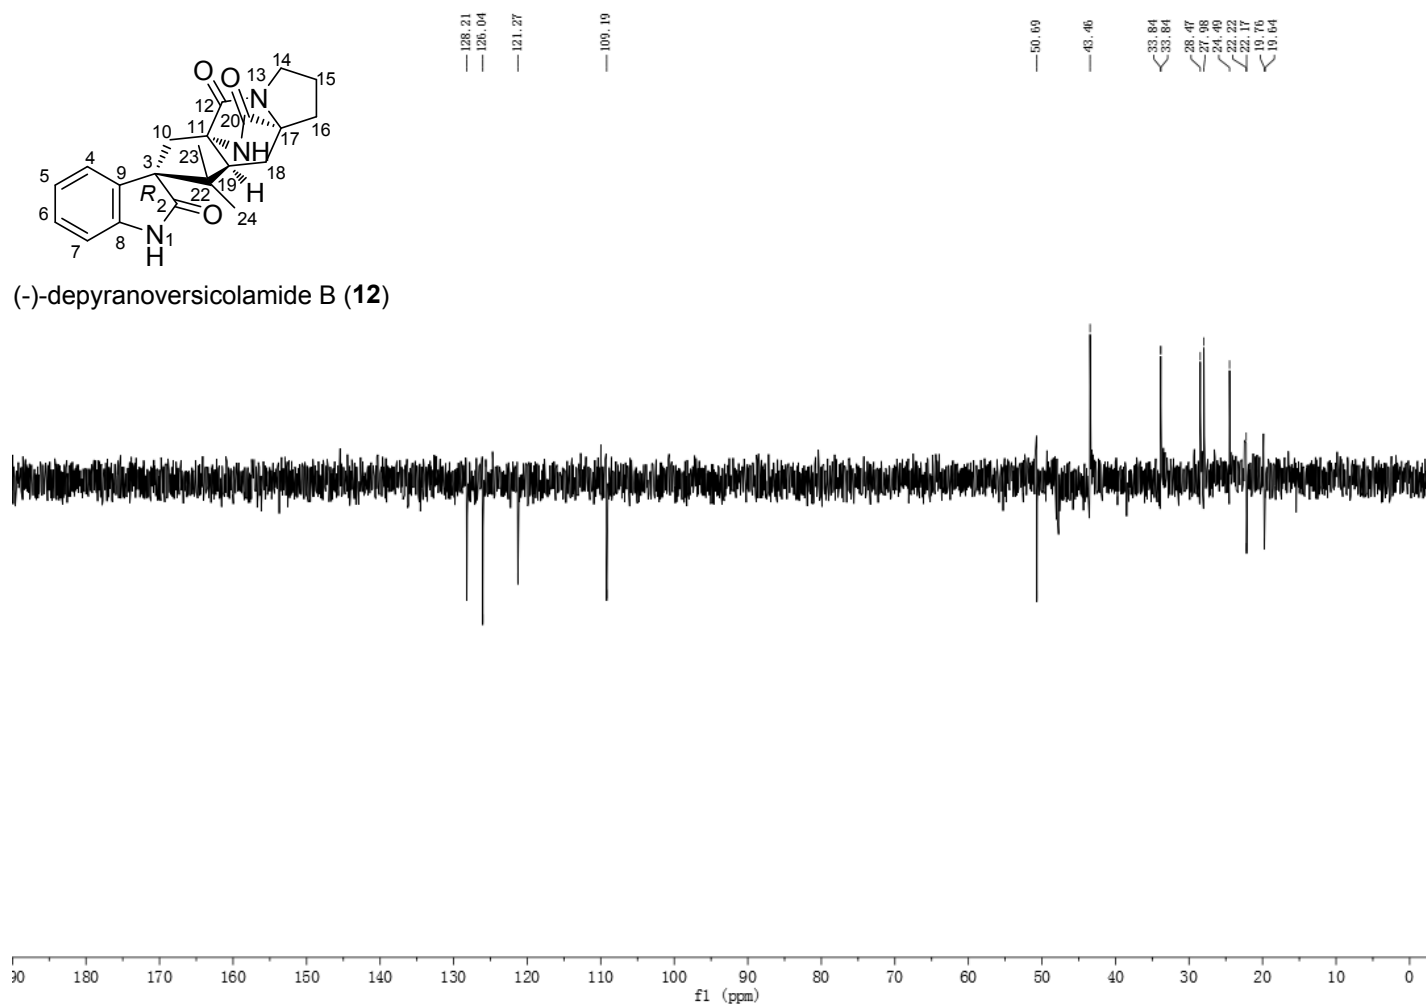

(-)-depyranoversicolamide B (12)

DEPT spectrum of (-)-depyranoversicolamide B (12)



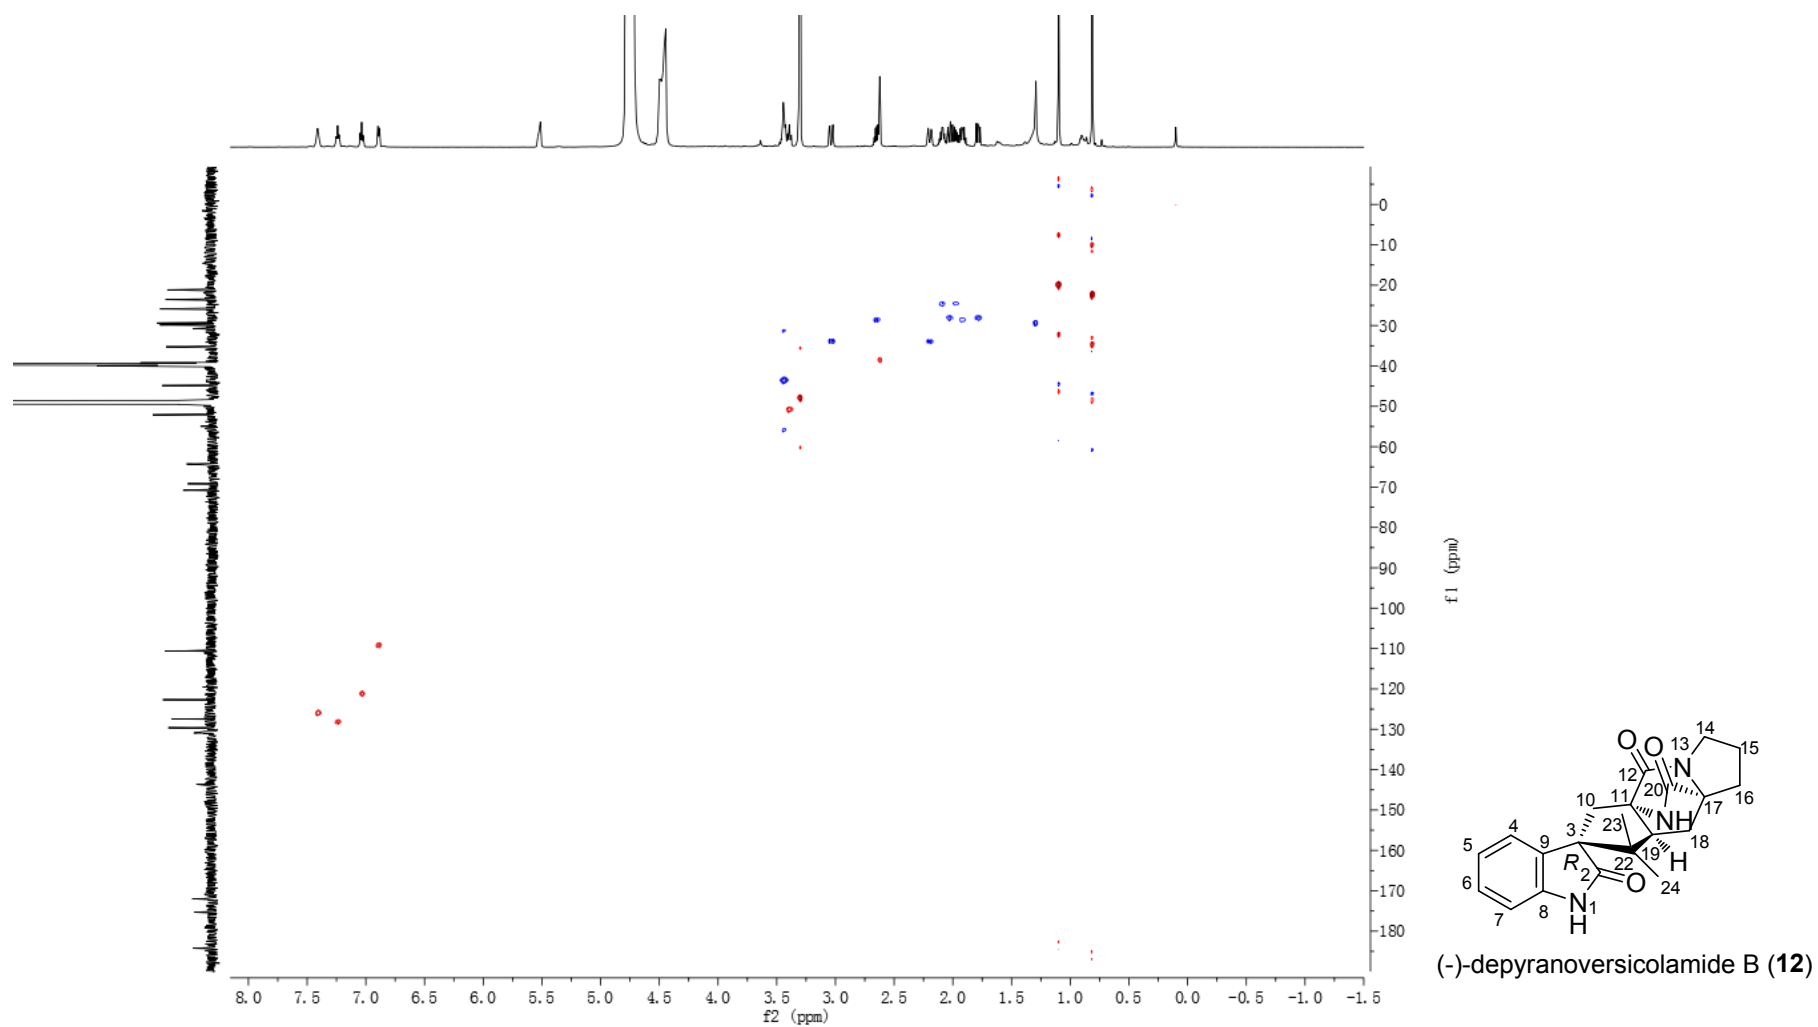

HSQC spectrum of (–)-depyranoversicolamide B (**12**)

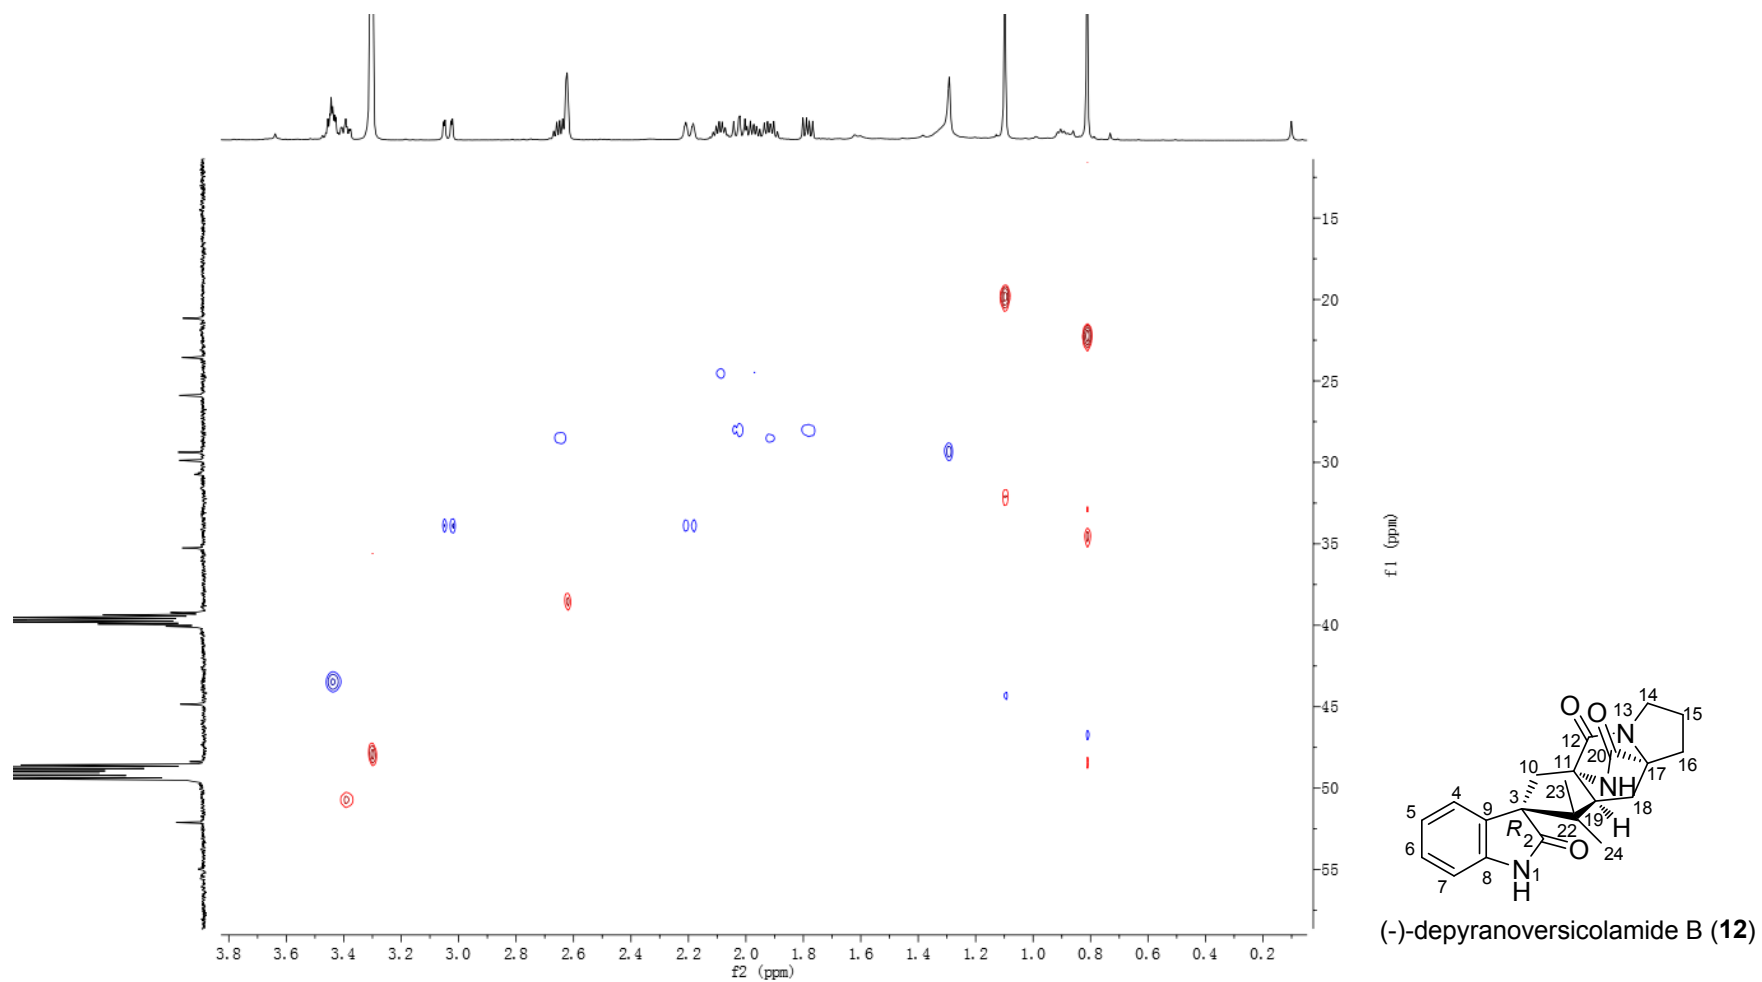

HSQC spectrum of (-)-depyranoversicolamide B (**12**)

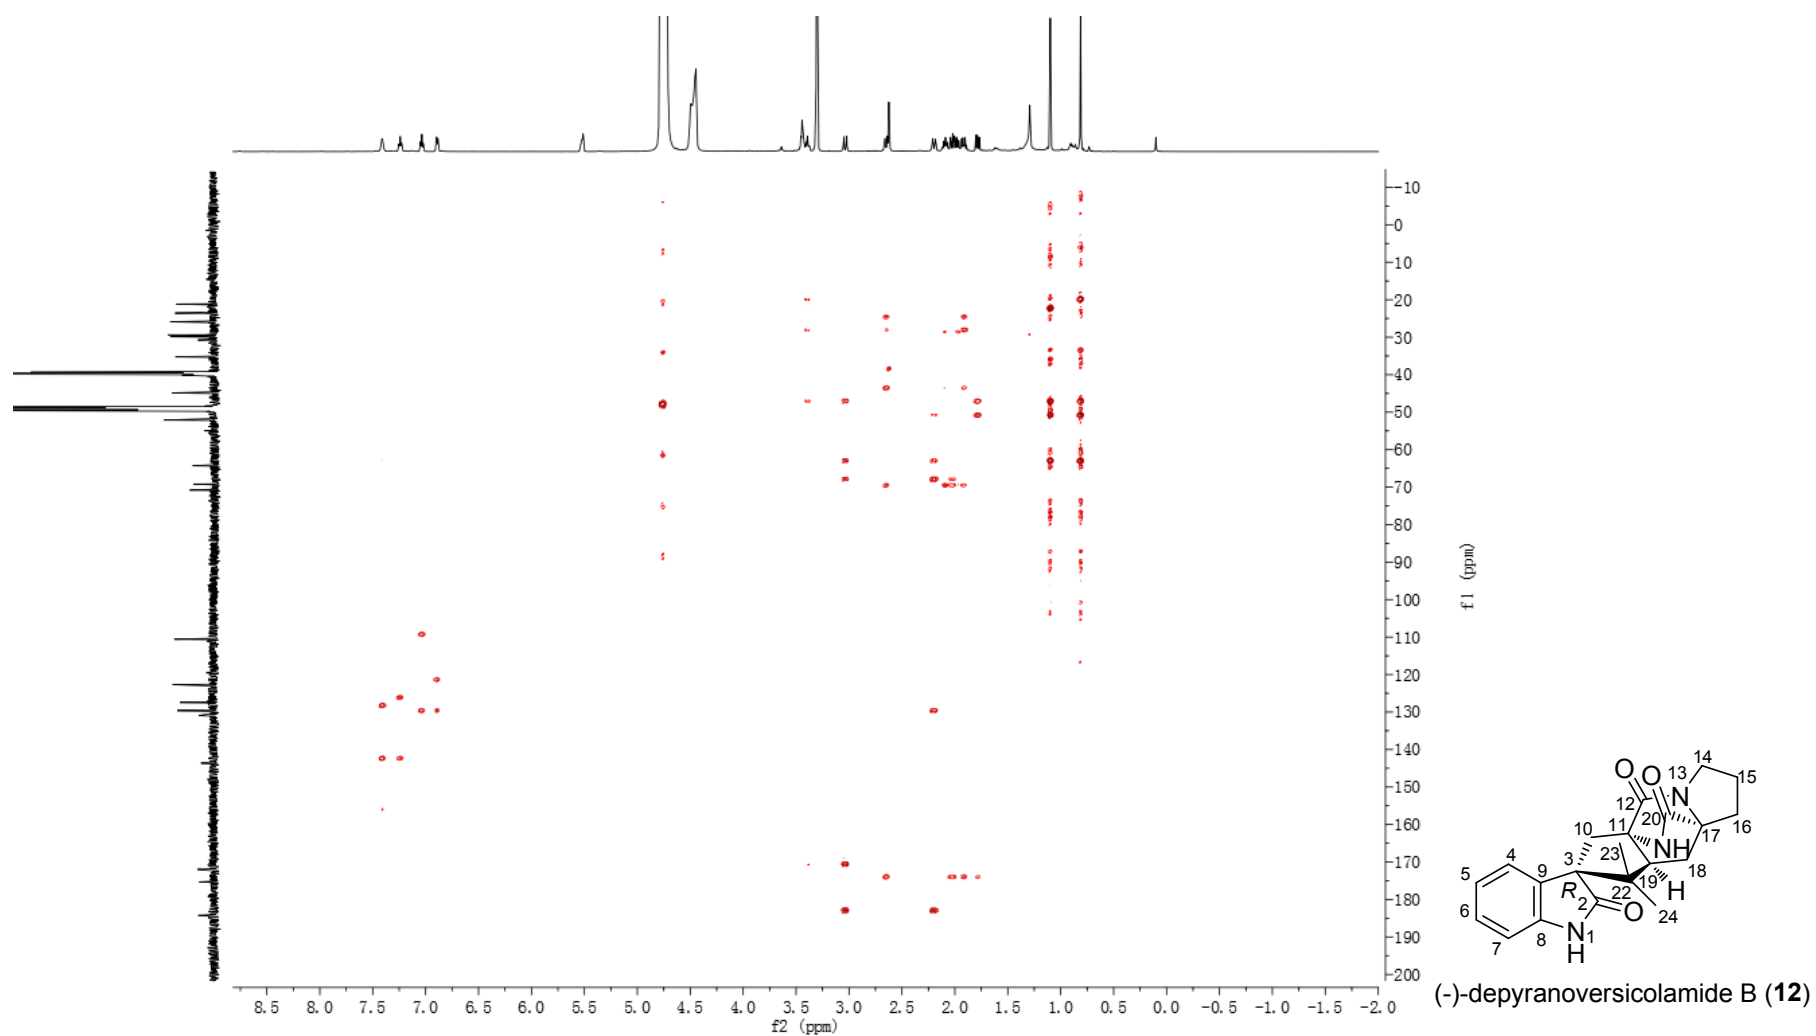

HMBC spectrum of (-)-depyranoversicolamide B (**12**)

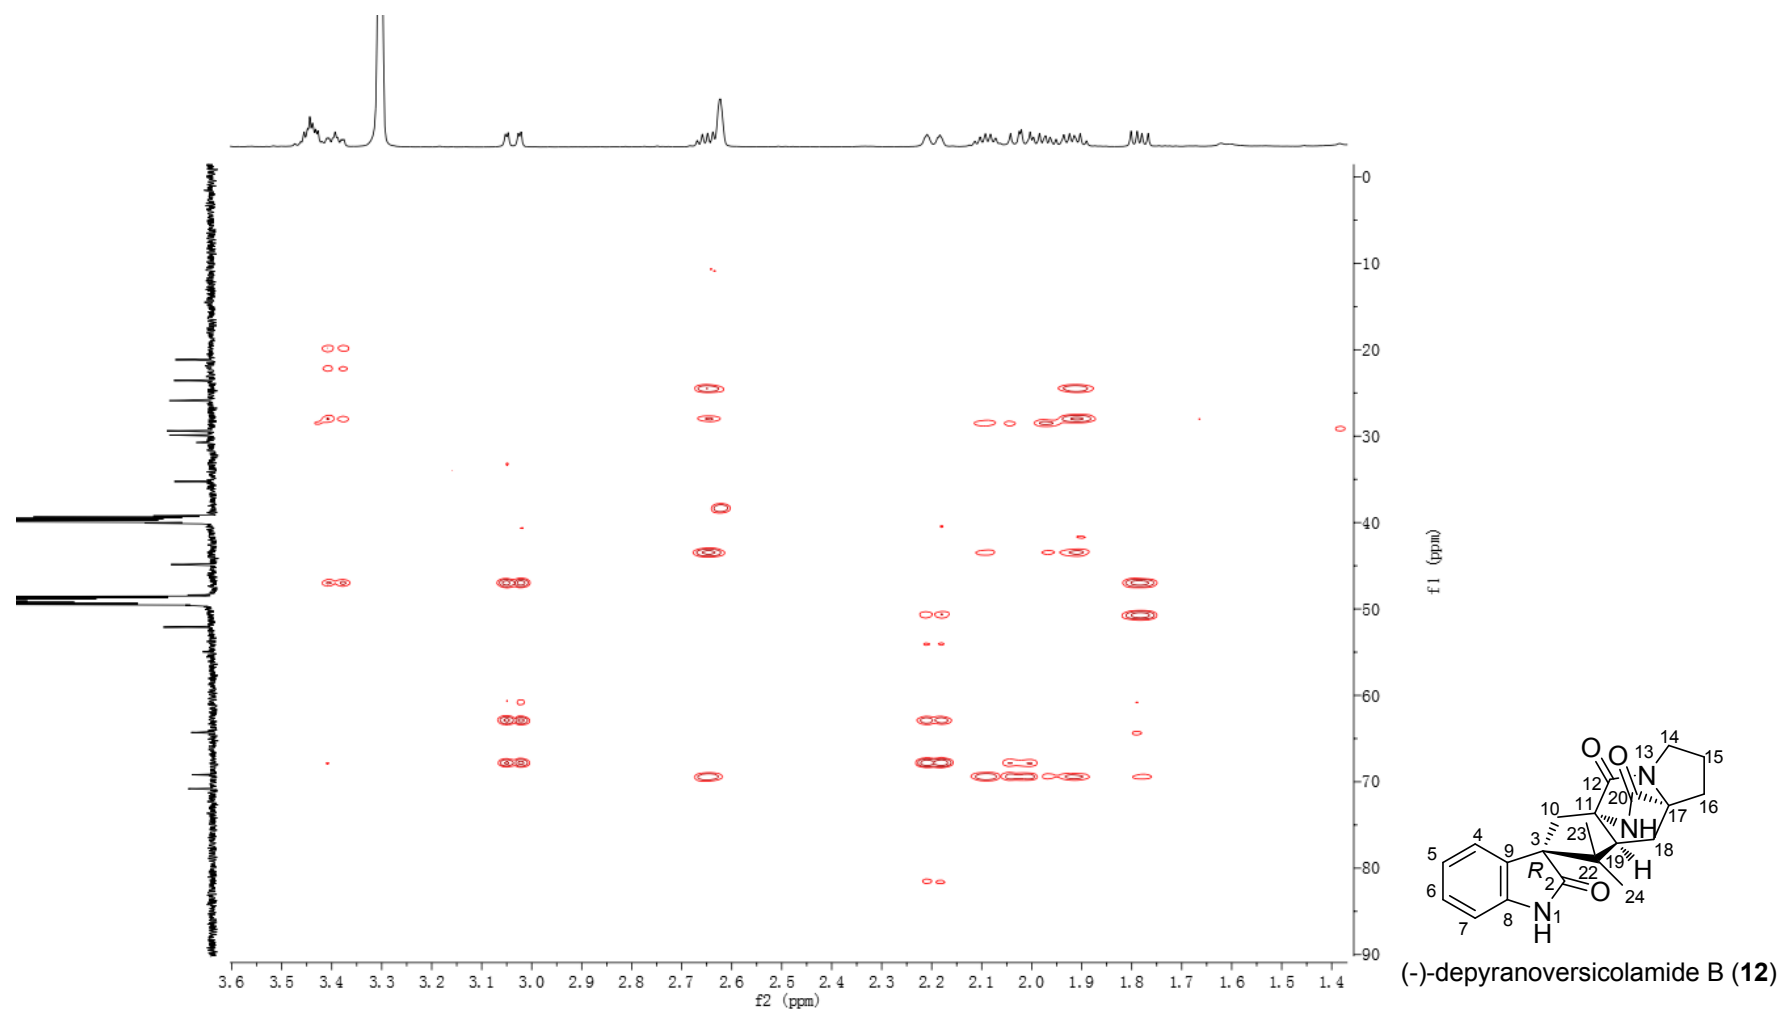

HMBC spectrum of (-)-depyranoversicolamide B (**12**)

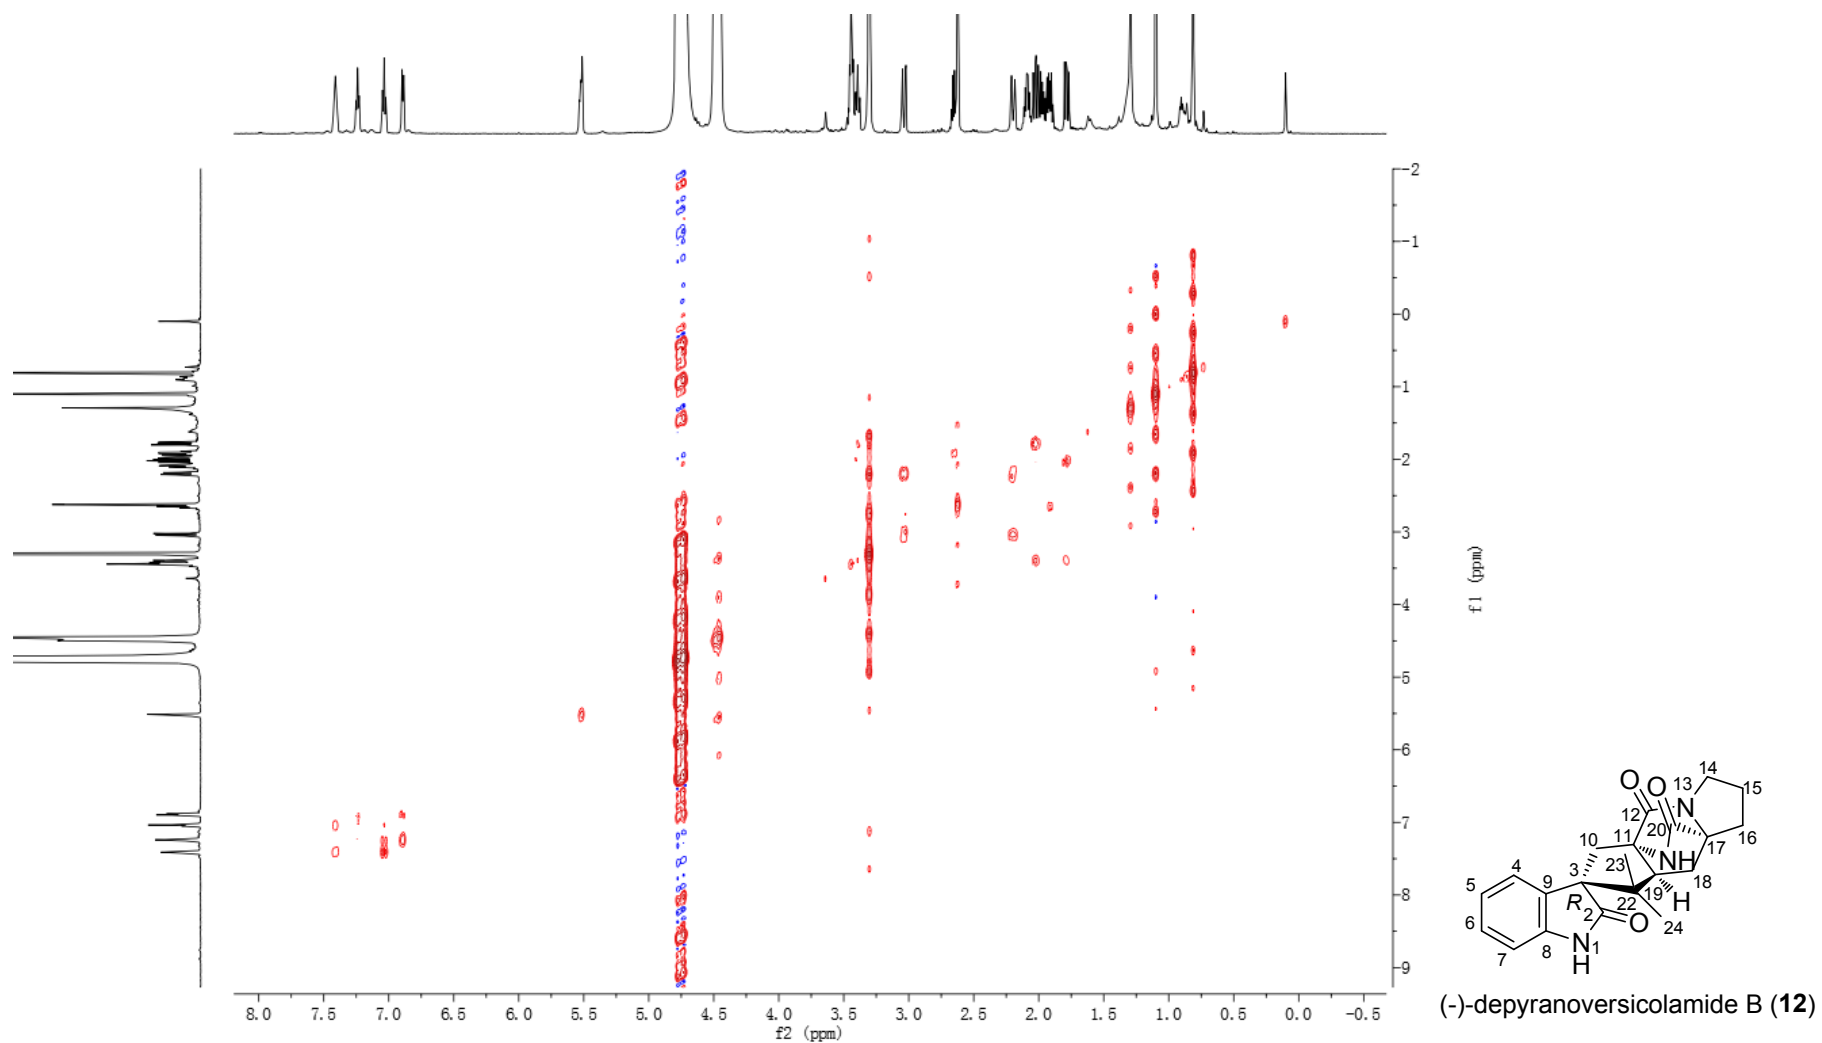

COSY spectrum of (-)-depyranoversicolamide B (**12**)

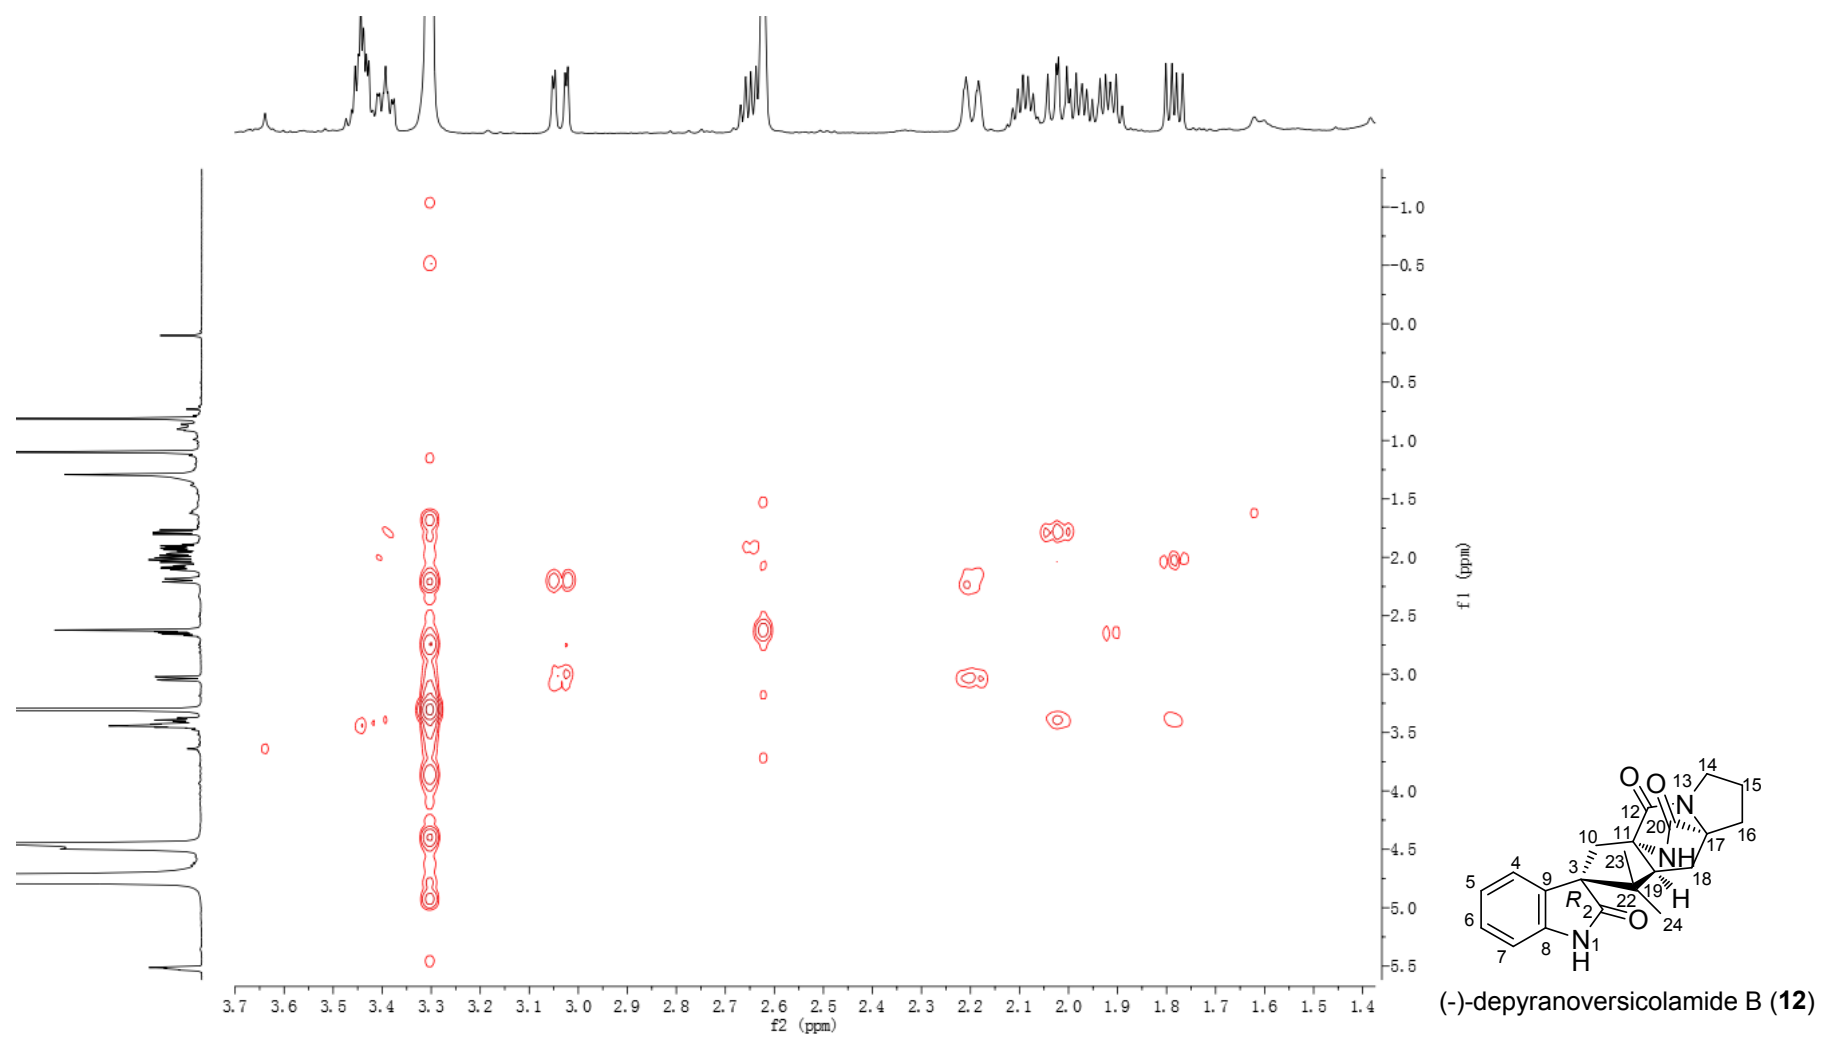

COSY spectrum of (-)-depyranoversicolamide B (**12**)
